# Supplementary material for: An acid-catalyzed 1,4-addition isocyanide-based multicomponent reaction in neat water
Source: Royal Society of Chemistry journal article supplement (doi:10.1039/d0gc00652a), 2020-01-01

## Supporting Information

# An acid-catalyzed 1,4-addition isocyanide-based multicomponent reaction in neat water

Jie Lei,<sup>a,b</sup> Yong Li,<sup>a,b</sup> Jia Xu,<sup>a</sup> Dian-Yong Tang,<sup>a</sup> Jing-Wei Shao,<sup>b</sup> Hong-yu Li,<sup>\*b</sup>  
Zhong-Zhu Chen<sup>\*a</sup> and Zhi-Gang Xu<sup>\*a</sup>

<sup>a</sup>College of Pharmacy, National & Local Joint Engineering Research Center of Targeted and Innovative Therapeutics, Chongqing Key Laboratory of Kinase Modulators as Innovative Medicine, Chongqing University of Arts and Sciences, Chongqing 402160, China. Email: 18883138277@163.com; xzg@cqwu.edu.cn

<sup>b</sup>Department of Pharmaceutical Sciences, College of Pharmacy, University of Arkansas for Medical Sciences, Little Rock, Arkansas 72205, USA. Email: HLi2@uams.edu

| <b>Table of Contents</b>                               | <b>Page</b> |
|--------------------------------------------------------|-------------|
| General Experimental.....                              | 2           |
| General procedures for compounds <b>5</b> .....        | 2           |
| General procedures for compounds <b>10</b> .....       | 2           |
| General procedures for compounds <b>11</b> .....       | 3           |
| Control experiments.....                               | 3-4         |
| Acylation of compound <b>5a</b> .....                  | 5           |
| NMR characterization data and figures of products..... | 5-46        |
| X-ray data .....                                       | 47          |

## General Experimental

<sup>1</sup>H and <sup>13</sup>C NMR were recorded on a Bruker 400 spectrometer. <sup>1</sup>H NMR data are reported as follows: chemical shift in ppm (δ), multiplicity (s = singlet, d = doublet, t = triplet, m = multiplet), coupling constant (Hz), relative intensity. <sup>13</sup>C NMR data are reported as follows: chemical shift in ppm (δ). LC/MS analyses were performed on a Shimadzu-2020 LC-MS instrument using the following conditions: Shim-pack VP-ODS C18 column (reverse phase, 150 x 4.6 mm); a linear gradient from 10% water and 90% acetonitrile to 75% acetonitrile and 25% water over 6.0 min; flow rate of 0.5 mL/min; UV photodiode array detection from 200 to 400 nm. High-resolution mass spectra (HRMS) were recorded on Thermo Scientific Exactive Plus System. The products were purified by Biotage Isolera™ Spektra Systems and hexane/EtOAc solvent systems. All reagents and solvents were obtained from commercial sources and used without further purification.

### General procedures for compound 5.

The solution of formic acid (5 mol%, aqueous solution) was added to a mixture of aldehyde (0.3 mmol), amine (0.3 mmol) and isocyanide (0.3 mmol). Then this system was stirred in water (2.0 mL) at 100 °C for 2 h and then monitored by TLC. When the reaction was completed, the reaction mixture was diluted with EtOAc (15.0 mL), washed with sat. NaHCO<sub>3</sub> and brine. The organic layer was dried over MgSO<sub>4</sub> and concentrated. The residue was purified by silica gel column chromatography using a gradient of ethyl acetate/hexane (0-100%) to afford the relative targeted product **5**.

### General procedure for compound 11

The solution of formic acid (5 mol%, aqueous solution) was added to a mixture of chromone-3-carboxaldehyde **1a** (0.2 mmol), 2-methylpropan-2-amine **2a** (0.2 mmol), 1,1,3,3-tetramethylbutyl isocyanide **3c** (0.2 mmol). Then this system was stirred in water (1.5 mL) at 100 °C for 2 h and then monitored by TLC. When the reaction was completed, the reaction mixture was concentrated under reduced pressure. In a solution of this residue in dichloromethane (DCM) (3.0 mL), [bis(trifluoroacetoxy)iodo]benzene (PIFA, 0.2 mmol) and trifluoroacetic acid (TFA, 0.2 mmol) were added and stirred at room temperature for 6 h. When the reaction was completed, the reaction mixture was diluted with EtOAc (15.0 mL), washed with sat.

Na<sub>2</sub>CO<sub>3</sub> and brine. The organic layer was dried over MgSO<sub>4</sub> and concentrated. The residue was purified by silica gel column chromatography using a gradient of ethyl acetate/hexane (0-100%) to afford the product **11**.

### Control experiments

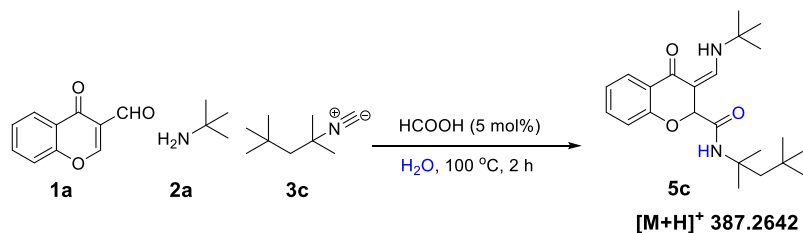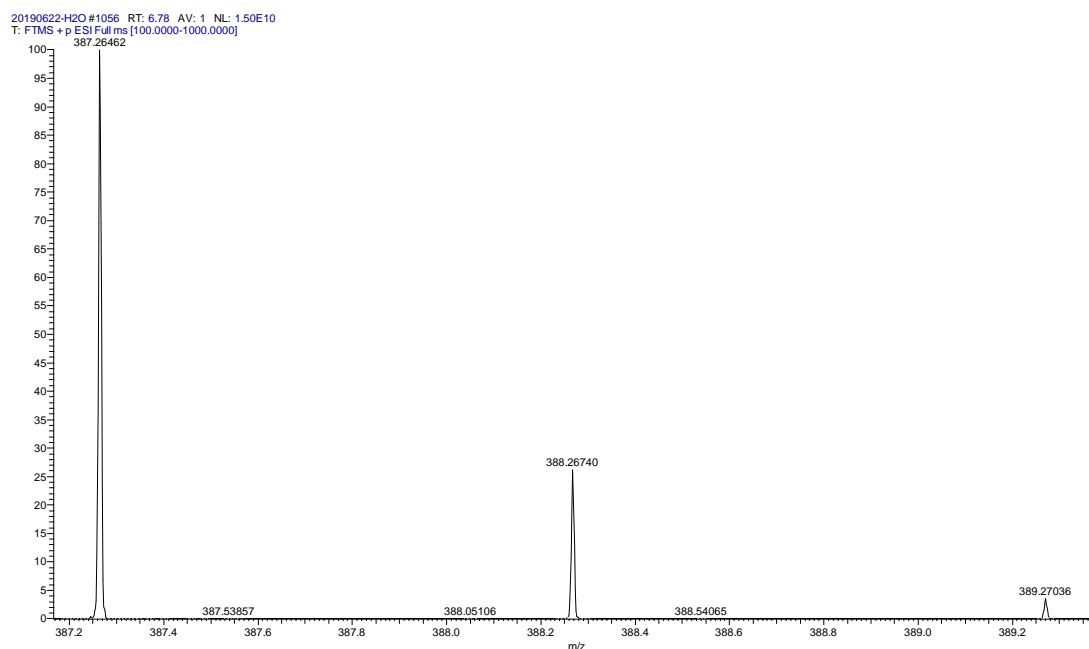

| m/z              | Intensity            | Relative      |
|------------------|----------------------|---------------|
| 121.02840        | 24675974.0           | 0.14          |
| 174.05490        | 101199264.0          | 0.58          |
| 230.11754        | 34497744.0           | 0.20          |
| 331.20160        | 30973452.0           | 0.18          |
| 385.24933        | 39078452.0           | 0.22          |
| <b>387.26462</b> | <b>17416132608.0</b> | <b>100.00</b> |
| 388.26730        | 4454016000.0         | 25.57         |
| <b>389.27026</b> | <b>619520576.0</b>   | <b>3.56</b>   |
| 390.27338        | 55054208.0           | 0.32          |

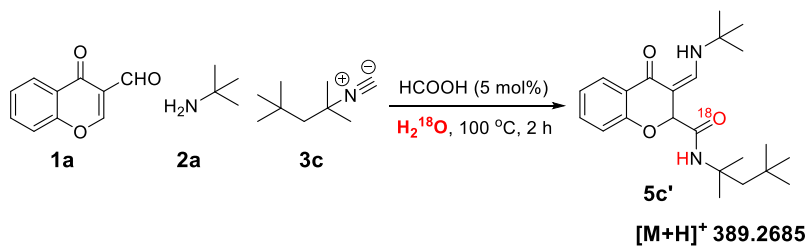

20190622-180 #1005 RT: 6.71 AV: 1 NL: 1.03E10  
T: FTMS + p ESI Full ms [100.0000-1000.0000]

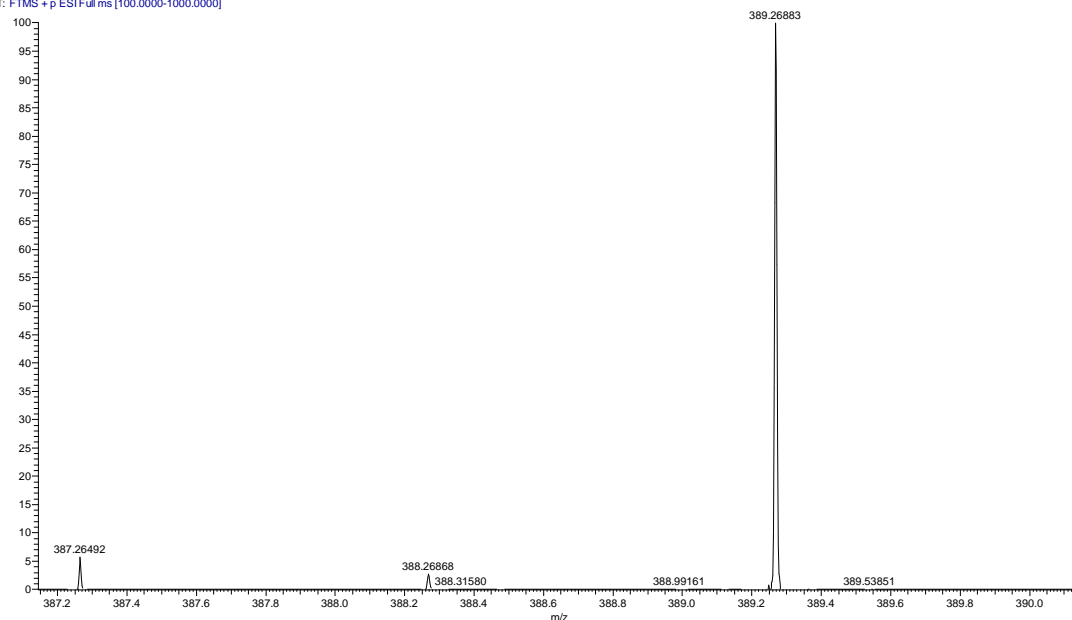

| m/z       | Intensity     | Relative |
|-----------|---------------|----------|
| 387.26495 | 751660544.0   | 5.87     |
| 388.26874 | 348332512.0   | 2.72     |
| 388.47635 | 3765759.8     | 0.03     |
| 389.00110 | 3907922.0     | 0.03     |
| 389.26883 | 12809865216.0 | 100.00   |
| 389.54413 | 4167084.3     | 0.03     |
| 390.05676 | 3746140.0     | 0.03     |
| 390.27167 | 3424700672.0  | 26.73    |
| 391.27271 | 3780219136.0  | 29.51    |

## Acylation of compound 5a

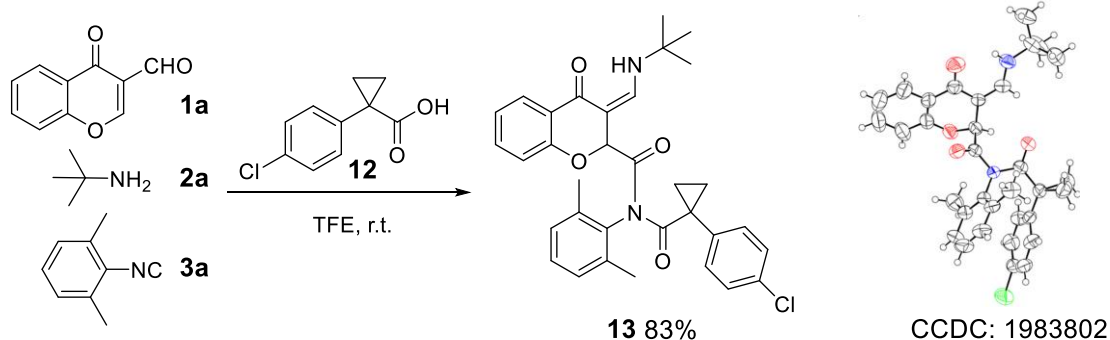

A solution of chromone-3-carboxaldehyde **1a** (0.3 mmol), 2-methylpropan-2-amine **2a** (0.3 mmol), 2-isocyano-1,3-dimethylbenzene **3a** (0.3 mmol) and 1-(4-chlorophenyl)cyclopropane-1-carboxylic acid **12** (0.3 mmol) was stirred in 2,2,2-trifluoroethanol (TFE, 2.0 mL) for 2 h. The reaction mixture was monitored by TLC. When the reaction was completed, the solvent was removed under reduced pressure. Then the reaction mixture was diluted with EtOAc (15.0 mL), washed with sat. NaHCO<sub>3</sub> and brine. The organic layer was dried over MgSO<sub>4</sub> and concentrated. The residue was purified by silica gel column chromatography using a gradient of ethyl acetate/hexane (0-100%) to afford product **13** with 83% yield.

## NMR Characterization Data and Figures of Products

### *(Z)*-3-((*tert*-butylamino)methylene)-*N*-(2,6-dimethylphenyl)-4-oxochromane-2-carboxamide

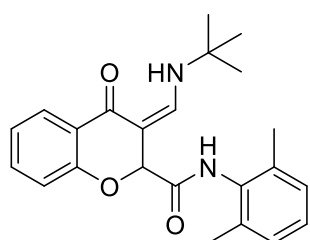

**5a**, 94 mg, light green solid, 83% (EA/Hex = 20%, R<sub>f</sub> = 0.3), <sup>1</sup>H NMR (400 MHz, CDCl<sub>3</sub>) δ 10.85 (d, *J* = 13.1 Hz, 1H), 7.93 (dd, *J* = 7.7, 1.6 Hz, 1H), 7.67 (s, 1H), 7.47 – 7.35 (m, 2H), 7.16 – 6.96 (m, 5H), 5.50 (s, 1H), 2.04 (s, 6H), 1.34 (s, 9H). <sup>13</sup>C NMR (100 MHz, CDCl<sub>3</sub>) δ 178.81, 168.96, 156.42, 149.08, 135.33, 133.67, 132.83, 128.19, 127.56, 126.62, 123.66, 122.63, 116.53, 95.50, 78.55, 52.91, 29.99, 18.14. HRMS (ESI) *m/z* calcd for C<sub>23</sub>H<sub>27</sub>N<sub>2</sub>O<sub>3</sub><sup>+</sup> (*M*+*H*)<sup>+</sup> 379.2016, found 379.2012.

***(Z)*-N-(tert-butyl)-3-((tert-butylamino)methylene)-4-oxochromane-2-carboxamide**

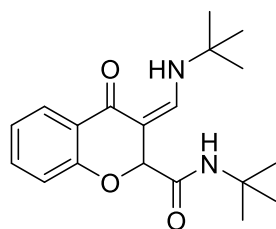

**5b**, 87 mg, light yellow solid, 88% (EA/Hex = 20%, R<sub>f</sub> = 0.25), <sup>1</sup>H NMR (400 MHz, CDCl<sub>3</sub>) δ 10.74 (d, *J* = 12.6 Hz, 1H), 7.87 (dd, *J* = 7.7, 1.7 Hz, 1H), 7.41 – 7.33 (m, 1H), 7.29 (d, *J* = 13.3 Hz, 1H), 7.10 – 7.02 (m, 1H), 6.93 (d, *J* = 8.2 Hz, 1H), 6.31 (s, 1H), 5.17 (s, 1H), 1.33 (s, 9H), 1.31 (s, 9H). <sup>13</sup>C NMR (100 MHz, CDCl<sub>3</sub>) δ 179.35, 168.87, 156.52, 148.57, 133.41, 126.48, 123.78, 122.34, 116.42, 95.96, 78.52, 52.79, 51.20, 29.99, 28.58. HRMS (ESI) *m/z* calcd for C<sub>19</sub>H<sub>27</sub>N<sub>2</sub>O<sub>3</sub><sup>+</sup> (M+H)<sup>+</sup> 331.2016, found 331.2019.

***(Z)*-3-((tert-butylamino)methylene)-4-oxo-N-(2,4,4-trimethylpentan-2-yl)chromane-2-carboxamide**

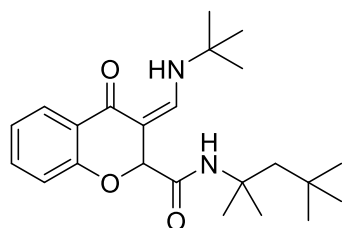

**5c**, 80 mg, light yellow solid, 70% (EA/Hex = 20%, R<sub>f</sub> = 0.30), <sup>1</sup>H NMR (400 MHz, CDCl<sub>3</sub>) δ 10.81 (d, *J* = 13.2 Hz, 1H), 7.96 (d, *J* = 2.5 Hz, 1H), 7.43 (dd, *J* = 8.6, 2.5 Hz, 1H), 7.34 (d, *J* = 13.4 Hz, 1H), 6.82 (d, *J* = 8.7 Hz, 1H), 6.31 (s, 1H), 5.14 (s, 1H), 1.38 (s, 2H), 1.34 (s, 9H), 0.91 (s, 6H). <sup>13</sup>C NMR (100 MHz, CDCl<sub>3</sub>) δ 177.55, 168.22, 155.36, 149.27, 135.90, 129.19, 125.21, 118.35, 114.92, 95.25, 78.51, 55.29, 51.94, 31.38, 29.96, 29.12, 28.69. HRMS (ESI) *m/z* calcd for C<sub>23</sub>H<sub>35</sub>N<sub>2</sub>O<sub>3</sub><sup>+</sup> (M+H)<sup>+</sup> 387.2642, found 387.2646.

***(Z)*-N-(tert-butyl)-3-(((2-methylbut-3-yn-2-yl)amino)methylene)-4-oxochromane-2-carboxamide**

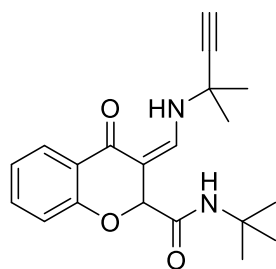

**5d**, 88 mg, light yellow solid, 86% (EA/Hex = 20%, Rf = 0.25),  $^1\text{H}$  NMR (400 MHz,  $\text{CDCl}_3$ )  $\delta$  10.64 (d,  $J = 12.7$  Hz, 1H), 7.87 (dd,  $J = 7.8, 1.7$  Hz, 1H), 7.55 (dd,  $J = 12.6, 0.8$  Hz, 1H), 7.39 (ddd,  $J = 8.2, 7.3, 1.8$  Hz, 1H), 7.11 – 7.02 (m, 1H), 6.95 (dd,  $J = 8.2, 0.8$  Hz, 1H), 6.30 (s, 1H), 5.19 (d,  $J = 0.8$  Hz, 1H), 2.49 (s, 1H), 1.60 (d,  $J = 1.3$  Hz, 6H), 1.32 (s, 9H).  $^{13}\text{C}$  NMR (100 MHz,  $\text{CDCl}_3$ )  $\delta$  180.34, 168.43, 156.81, 148.72, 133.79, 126.61, 123.56, 122.39, 116.61, 97.23, 84.85, 78.54, 73.21, 51.25, 31.26, 30.99, 28.60. HRMS (ESI)  $m/z$  calcd for  $\text{C}_{20}\text{H}_{25}\text{N}_2\text{O}_3^+$  ( $\text{M}+\text{H}$ ) $^+$  341.1860, found 341.1857.

**(Z)-3-(((2-methylbut-3-yn-2-yl)amino)methylene)-4-oxo-N-(2,4,4-trimethylpentan-2-yl)chromane-2-carboxamide**

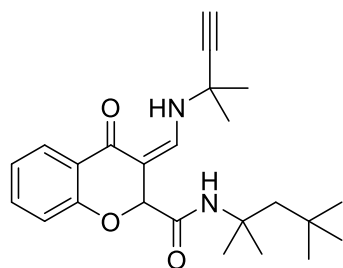

**5e**, 94 mg, light yellow solid, 79% (EA/Hex = 20%, Rf = 0.25),  $^1\text{H}$  NMR (400 MHz,  $\text{CDCl}_3$ )  $\delta$  10.66 (d,  $J = 12.5$  Hz, 1H), 7.90 – 7.80 (m, 1H), 7.56 (dd,  $J = 12.7, 0.7$  Hz, 1H), 7.38 (ddd,  $J = 8.2, 7.3, 1.8$  Hz, 1H), 7.09 – 7.00 (m, 1H), 6.93 (dd,  $J = 8.2, 0.7$  Hz, 1H), 6.34 (s, 1H), 5.16 (d,  $J = 0.7$  Hz, 1H), 2.49 (s, 1H), 1.59 (d,  $J = 3.0$  Hz, 5H), 1.36 (d,  $J = 7.7$  Hz, 6H), 0.89 (s, 9H).  $^{13}\text{C}$  NMR (100 MHz,  $\text{CDCl}_3$ )  $\delta$  180.17, 168.26, 156.76, 148.96, 133.78, 126.61, 123.48, 122.35, 116.57, 96.98, 84.87, 78.51, 73.23, 55.19, 51.95, 51.17, 31.36, 29.14, 28.68. HRMS (ESI)  $m/z$  calcd for  $\text{C}_{24}\text{H}_{33}\text{N}_2\text{O}_3^+$  ( $\text{M}+\text{H}$ ) $^+$  397.2486, found 397.2502.

**(Z)-N-(2,6-dimethylphenyl)-3-(((2-methylbut-3-yn-2-yl)amino)methylene)-4-oxochromane-2-carboxamide**

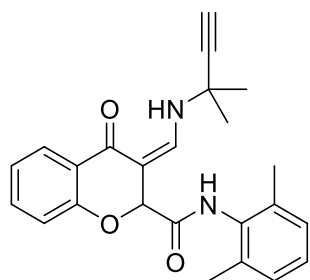

**5f**, 67 mg, light yellow solid, 57% (EA/Hex = 30%, R<sub>f</sub> = 0.35), <sup>1</sup>H NMR (400 MHz, CDCl<sub>3</sub>) δ 10.75 (d, *J* = 12.5 Hz, 1H), 7.93 (dd, *J* = 7.7, 1.7 Hz, 1H), 7.73 – 7.56 (m, 2H), 7.42 (ddd, *J* = 8.2, 7.4, 1.7 Hz, 1H), 7.10 – 6.99 (m, 5H), 5.52 (s, 1H), 2.50 (s, 1H), 2.04 (s, 6H), 1.60 (d, *J* = 1.9 Hz, 6H). <sup>13</sup>C NMR (100 MHz, CDCl<sub>3</sub>) δ 179.81, 168.53, 156.71, 149.25, 135.36, 134.06, 132.84, 128.18, 127.56, 126.75, 123.45, 122.68, 116.74, 96.75, 84.81, 78.54, 73.33, 51.23, 31.10, 18.19. HRMS (ESI) *m/z* calcd for C<sub>24</sub>H<sub>25</sub>N<sub>2</sub>O<sub>3</sub><sup>+</sup> (M+H)<sup>+</sup> 389.1860, found 389.1861.

**(Z)-N-(tert-butyl)-3-((isopropylamino)methylene)-4-oxochromane-2-carboxamide**

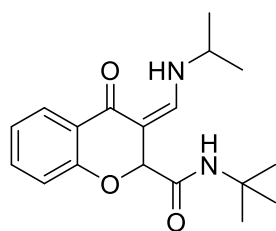

**5g**, 65 mg, light yellow solid, 69% (EA/Hex = 20%, R<sub>f</sub> = 0.25), <sup>1</sup>H NMR (400 MHz, CDCl<sub>3</sub>) δ 10.41 (s, 1H), 7.87 (d, *J* = 6.6 Hz, 1H), 7.36 (dd, *J* = 11.3, 4.1 Hz, 1H), 7.18 (d, *J* = 13.0 Hz, 1H), 7.05 (t, *J* = 7.5 Hz, 1H), 6.93 (d, *J* = 8.2 Hz, 1H), 6.30 (s, 1H), 5.15 (s, 1H), 3.53 (dt, *J* = 13.2, 6.5 Hz, 1H), 1.30 (dd, *J* = 5.4, 4.7 Hz, 9H), 1.27 (d, *J* = 6.5 Hz, 6H). <sup>13</sup>C NMR (100 MHz, CDCl<sub>3</sub>) δ 179.33, 168.93, 156.50, 150.76, 133.46, 126.53, 122.34, 116.39, 95.90, 78.29, 51.23, 50.60, 28.60, 23.77, 23.57. HRMS (ESI) *m/z* calcd for C<sub>18</sub>H<sub>25</sub>N<sub>2</sub>O<sub>3</sub><sup>+</sup> (M+H)<sup>+</sup> 317.1860, found 317.1861.

**(Z)-3-((isopropylamino)methylene)-4-oxo-N-(2,4,4-trimethylpentan-2-yl)chromane-2-carboxamide**



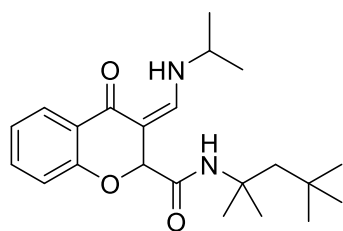

**5h**, 66 mg, light yellow solid, 60% (EA/Hex = 25%, R<sub>f</sub> = 0.30), <sup>1</sup>H NMR (400 MHz, CDCl<sub>3</sub>) δ 10.43 (d, *J* = 7.4 Hz, 1H), 7.93 – 7.78 (m, 1H), 7.36 (ddd, *J* = 8.6, 7.4, 1.7 Hz, 1H), 7.20 (d, *J* = 13.0 Hz, 1H), 7.04 (ddd, *J* = 7.4, 4.4, 0.8 Hz, 1H), 6.92 (dd, *J* = 8.2, 0.4 Hz, 1H), 6.35 (s, 1H), 5.12 (s, 1H), 3.52 (td, *J* = 13.3, 6.6 Hz, 1H), 1.65 (d, *J* = 18.8 Hz, 2H), 1.35 (d, *J* = 3.8 Hz, 6H), 1.27 (dd, *J* = 6.5, 0.8 Hz, 6H), 0.87 (s, 9H). <sup>13</sup>C NMR (100 MHz, CDCl<sub>3</sub>) δ 179.26, 168.81, 156.46, 151.06, 133.46, 126.53, 123.59, 122.31, 116.36, 95.63, 78.30, 55.17, 51.81, 50.64, 31.53, 31.33, 29.21, 28.74, 23.82, 23.54. HRMS (ESI) *m/z* calcd for C<sub>22</sub>H<sub>33</sub>N<sub>2</sub>O<sub>3</sub><sup>+</sup> (M+H)<sup>+</sup> 373.2486, found 373.2486.

***(Z)*-6-bromo-*N*-(*tert*-butyl)-3-(((*tert*-butylamino)methylene)-4-oxochromane-2-carboxamide**

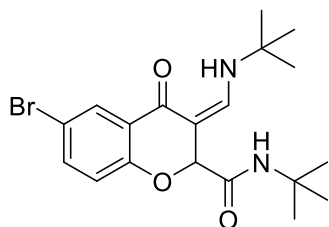

**5i**, 72 mg, light green solid, 59% (EA/Hex = 20%, R<sub>f</sub> = 0.25), <sup>1</sup>H NMR (400 MHz, CDCl<sub>3</sub>) δ 10.78 (d, *J* = 12.6 Hz, 1H), 7.97 (d, *J* = 2.5 Hz, 1H), 7.44 (dd, *J* = 8.6, 2.5 Hz, 1H), 7.31 (d, *J* = 13.4 Hz, 1H), 6.83 (d, *J* = 8.6 Hz, 1H), 6.25 (s, 1H), 5.17 (s, 1H), 1.33 (s, 9H), 1.32 (s, 9H). <sup>13</sup>C NMR (100 MHz, CDCl<sub>3</sub>) δ 177.66, 168.44, 155.39, 149.04, 135.93, 129.21, 118.38, 114.98, 95.48, 78.53, 53.03, 51.34, 29.94, 28.59. HRMS (ESI) *m/z* calcd for C<sub>19</sub>H<sub>26</sub>BrN<sub>2</sub>O<sub>3</sub><sup>+</sup> (M+H)<sup>+</sup> 409.1121, found 409.1131.

***(Z)*-6-bromo-*N*-(*tert*-butyl)-3-(((2-methylbut-3-yn-2-yl)amino)methylene)-4-oxochromane-2-carboxamide**

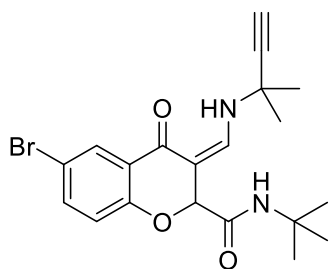

**5j**, 92 mg, light yellow solid, 74% (EA/Hex = 20%, R<sub>f</sub> = 0.25), <sup>1</sup>H NMR (400 MHz, CDCl<sub>3</sub>) δ 10.67 (d, *J* = 12.5 Hz, 1H), 7.96 (d, *J* = 2.5 Hz, 1H), 7.58 (d, *J* = 12.7 Hz, 1H), 7.49 – 7.43 (m, 1H), 6.85 (d, *J* = 8.7 Hz, 1H), 6.24 (s, 1H), 5.19 (s, 1H), 2.50 (d, *J* = 0.5 Hz, 1H), 1.60 (s, 6H), 1.33 (s, 9H). <sup>13</sup>C NMR (100 MHz, CDCl<sub>3</sub>) δ 178.74, 168.02, 155.68, 149.24, 136.32, 129.31, 125.04, 118.58, 115.03, 96.67, 84.58, 78.56, 73.50, 51.40, 31.24, 30.97, 28.63. HRMS (ESI) *m/z* calcd for C<sub>20</sub>H<sub>24</sub>BrN<sub>2</sub>O<sub>3</sub><sup>+</sup> (M+H)<sup>+</sup> 419.0965, found 419.0997.

**(Z)-6-bromo-3-(((2-methylbut-3-yn-2-yl)amino)methylene)-4-oxo-N-(2,4,4-trimethylpentan-2-yl)chromane-2-carboxamide**

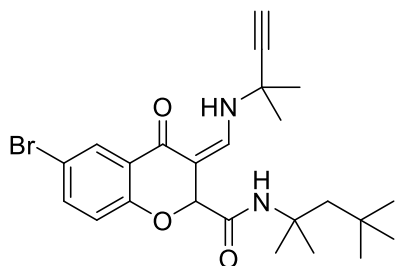

**5k**, 112 mg, light yellow solid, 80% (EA/Hex = 30%, R<sub>f</sub> = 0.25), <sup>1</sup>H NMR (400 MHz, CDCl<sub>3</sub>) δ 10.70 (d, *J* = 12.7 Hz, 1H), 7.96 (d, *J* = 2.5 Hz, 1H), 7.60 (d, *J* = 12.7 Hz, 1H), 7.46 (dd, *J* = 8.7, 2.5 Hz, 1H), 6.84 (d, *J* = 8.7 Hz, 1H), 6.30 (s, 1H), 5.17 (s, 1H), 2.51 (s, 1H), 1.67 (s, 2H), 1.60 (d, *J* = 2.5 Hz, 6H), 1.38 (d, *J* = 9.0 Hz, 6H), 0.91 (s, 9H). <sup>13</sup>C NMR (100 MHz, CDCl<sub>3</sub>) δ 178.87, 167.83, 155.65, 149.47, 137.28, 136.30, 129.30, 128.80, 124.96, 119.73, 118.55, 114.98, 96.44, 78.54, 73.52, 55.35, 52.47, 52.01, 31.60, 30.99, 29.68, 29.11. HRMS (ESI) *m/z* calcd for C<sub>24</sub>H<sub>31</sub>BrN<sub>2</sub>O<sub>3</sub><sup>+</sup> (M+H)<sup>+</sup> 475.1591, found 475.1595.

**(Z)-N-(2,6-dimethylphenyl)-3-((isopropylamino)methylene)-4-oxochromane-2-carboxamide**

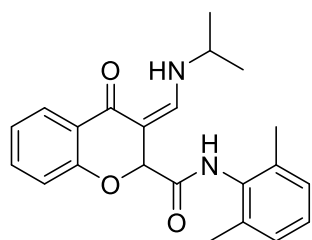

**5l**, 78 mg, white solid, 71% (EA/Hex = 30%, Rf = 0.25),  $^1\text{H}$  NMR (400 MHz,  $\text{CDCl}_3$ )  $\delta$  10.44 (d,  $J = 11.7$  Hz, 1H), 7.93 (dd,  $J = 7.8, 1.5$  Hz, 1H), 7.66 (s, 1H), 7.40 (ddd,  $J = 8.3, 7.4, 1.1$  Hz, 1H), 7.26 (dd,  $J = 13.6, 6.8$  Hz, 2H), 7.13 – 7.02 (m, 4H), 5.48 (s, 1H), 3.53 (dq,  $J = 13.3, 6.7$  Hz, 1H), 2.03 (s, 6H), 1.28 (dd,  $J = 6.5, 3.7$  Hz, 6H).  $^{13}\text{C}$  NMR (100 MHz,  $\text{CDCl}_3$ )  $\delta$  179.02, 168.94, 156.47, 151.15, 135.31, 133.75, 132.80, 128.19, 127.55, 126.68, 123.61, 122.64, 116.56, 95.52, 78.44, 50.74, 23.72, 23.62, 18.12. HRMS (ESI)  $m/z$  calcd for  $\text{C}_{22}\text{H}_{25}\text{N}_2\text{O}_3^+$  ( $\text{M}+\text{H}$ ) $^+$  365.1860, found 365.1865.

***(Z)-6-bromo-N-(tert-butyl)-3-((isopropylamino)methylene)-4-oxochromane-2-carboxamide***

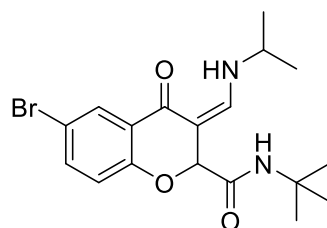

**5m**, 82 mg, white solid, 69% (EA/Hex = 20%, Rf = 0.35),  $^1\text{H}$  NMR (400 MHz,  $\text{CDCl}_3$ )  $\delta$  10.45 (d,  $J = 21.3$  Hz, 1H), 7.96 (d,  $J = 2.5$  Hz, 1H), 7.44 (dd,  $J = 8.6, 2.5$  Hz, 1H), 7.23 (d,  $J = 13.4$  Hz, 1H), 6.82 (d,  $J = 8.7$  Hz, 1H), 6.30 (s, 1H), 5.12 (d,  $J = 0.4$  Hz, 1H), 3.54 (td,  $J = 13.3, 6.6$  Hz, 1H), 1.36 (d,  $J = 5.6$  Hz, 6H), 1.28 (d,  $J = 6.5$  Hz, 6H), 0.90 (s, 9H).  $^{13}\text{C}$  NMR (100 MHz,  $\text{CDCl}_3$ )  $\delta$  178.50, 169.19, 156.22, 152.30, 136.82, 130.09, 125.97, 119.20, 115.80, 96.05, 79.19, 56.19, 52.74, 51.64, 32.44, 32.23, 30.06, 29.61, 24.61, 24.37. HRMS (ESI)  $m/z$  calcd for  $\text{C}_{18}\text{H}_{24}\text{BrN}_2\text{O}_3^+$  ( $\text{M}+\text{H}$ ) $^+$  395.0965, found 395.0961.

***(Z)-N-butyl-3-((tert-butylamino)methylene)-4-oxochromane-2-carboxamide***

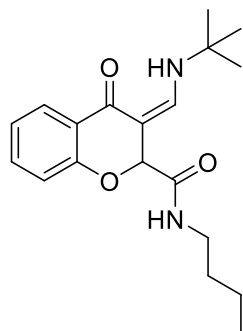

**5n**, 35mg, yellow solid, 36% (EA/Hex = 20%, Rf = 0.3),  $^1\text{H}$  NMR (400 MHz,  $\text{CDCl}_3$ )  $\delta$  10.78 (d,  $J$  = 13.7 Hz, 1H), 7.87 (d,  $J$  = 7.8 Hz, 1H), 7.40 – 7.28 (m, 2H), 7.05 (t,  $J$  = 7.5 Hz, 1H), 6.94 (d,  $J$  = 8.2 Hz, 1H), 6.42 (s, 1H), 5.28 (s, 1H), 3.25 (ddd,  $J$  = 29.6, 13.4, 6.8 Hz, 2H), 1.48 – 1.43 (m, 2H), 1.25 (s, 9H), 1.20 (d,  $J$  = 7.2 Hz, 2H), 0.84 (dd,  $J$  = 8.0, 6.7 Hz, 3H).  $^{13}\text{C}$  NMR (101 MHz,  $\text{CDCl}_3$ )  $\delta$  179.02, 169.97, 156.48, 148.86, 133.48, 126.50, 123.58, 122.34, 116.35, 95.58, 52.82, 38.99, 31.46, 29.98, 29.66, 29.39, 19.81, 13.62. HRMS (ESI)  $m/z$  calcd for  $\text{C}_{19}\text{H}_{27}\text{N}_2\text{O}_3^+$  ( $\text{M}+\text{H}$ ) $^+$  331.2016, found 331.2014.

***(Z)*-N-benzyl-3-((*tert*-butylamino)methylene)-4-oxochromane-2-carboxamide**

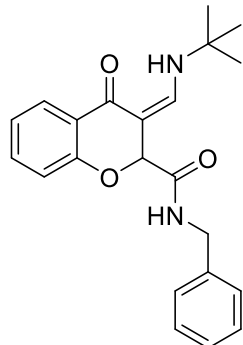

**5o**, 45 mg, yellow solid, 42% (EA/Hex = 20%, Rf = 0.3),  $^1\text{H}$  NMR (400 MHz,  $\text{cdcl}_3$ )  $\delta$  10.78 (d,  $J$  = 13.5 Hz, 1H), 7.89 (d,  $J$  = 8.1 Hz, 1H), 7.40 – 7.24 (m, 6H), 7.11 (d,  $J$  = 6.8 Hz, 1H), 7.06 (t,  $J$  = 7.4 Hz, 1H), 6.91 (d,  $J$  = 8.0 Hz, 1H), 6.78 (s, 1H), 5.36 (s, 1H), 4.57 – 4.38 (m, 2H), 1.33 (s, 9H).  $^{13}\text{C}$  NMR (101 MHz,  $\text{CDCl}_3$ )  $\delta$  170.09, 156.44, 148.83, 137.69, 133.57, 128.66, 127.45, 1127.28, 126.53, 123.99, 122.43, 116.50, 95.49, 52.86, 43.06, 29.53. HRMS (ESI)  $m/z$  calcd for  $\text{C}_{22}\text{H}_{25}\text{N}_2\text{O}_3^+$  ( $\text{M}+\text{H}$ ) $^+$  365.1860, found 365.1859.

***(Z)*-3-((*tert*-butylamino)methylene)-4-oxo-N-((*S*)-1-phenylethyl)chromane-2-carboxamide**

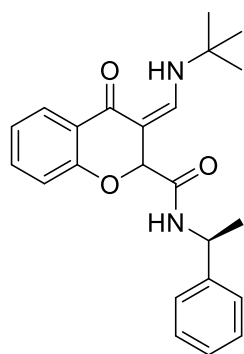

**5p** (*dr* =1:1), 62mg, yellow solid, 55% (EA/Hex = 20%, *R<sub>f</sub>* = 0.3), <sup>1</sup>H NMR (400 MHz, CDCl<sub>3</sub>) δ 10.79 (d, *J* = 12.9 Hz, 1H), 10.70 (d, *J* = 12.4 Hz, 1H), 7.99 (d, *J* = 7.7 Hz, 1H), 7.90 – 7.86 (m, 1H), 7.67 (s, 1H), 7.54 (s, 1H), 7.45 (d, *J* = 8.5 Hz, 1H), 7.42 (s, 1H), 7.33 (d, *J* = 7.1 Hz, 4H), 7.28 (s, 2H), 7.22 (d, *J* = 7.7 Hz, 2H), 7.19 – 7.14 (m, 3H), 7.05 (dd, *J* = 17.2, 7.7 Hz, 2H), 6.96 – 6.91 (m, 1H), 5.29 (d, *J* = 14.8 Hz, 2H), 5.07 – 4.99 (m, 2H), 1.46 (s, 3H), 1.34 (s, 3H), 1.23 (s, 9H). <sup>13</sup>C NMR (101 MHz, CDCl<sub>3</sub>) δ 181.17, 179.02, 169.28, 168.94, 158.21, 156.45, 154.77, 149.06, 148.34, 134.22, 133.44, 128.84, 128.54, 128.40, 128.38, 127.49, 126.11, 126.05, 125.61, 125.47, 125.43, 124.02, 123.87, 122.38, 117.32, 116.52, 116.46, 78.42, 78.22, 52.81, 52.48, 48.76, 48.53, 29.99, 29.45, 22.00, 21.87. HRMS (ESI) *m/z* calcd for C<sub>23</sub>H<sub>27</sub>N<sub>2</sub>O<sub>3</sub><sup>+</sup> (*M*+*H*)<sup>+</sup> 379.2016, found 379.2015.

**(Z)-3-((tert-butylamino)methylene)-N-cyclohexyl-4-oxochromane-2-carboxamide**

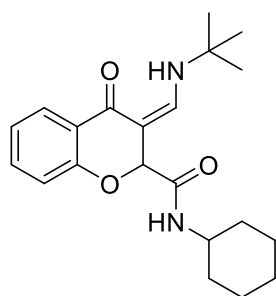

**5q**, 41mg, yellow solid, 39% (EA/Hex = 20%, *R<sub>f</sub>* = 0.3), <sup>1</sup>H NMR (400 MHz, CDCl<sub>3</sub>) δ 10.76 (d, *J* = 13.2 Hz, 1H), 8.18 (s, 1H), 7.37 (dd, *J* = 17.8, 8.6 Hz, 2H), 7.04 (t, *J* = 7.5 Hz, 1H), 6.94 (d, *J* = 8.2 Hz, 1H), 6.32 (d, *J* = 6.8 Hz, 1H), 5.26 (s, 1H), 3.70 (d, *J* = 12.7 Hz, 1H), 1.75 – 1.65 (m, 3H), 1.59 – 1.48 (m, 3H), 1.33 (s, 9H), 1.20 – 1.10 (m, 4H). <sup>13</sup>C NMR (101 MHz, CDCl<sub>3</sub>) δ 179.19, 169.02, 155.50, 134.11, 133.73, 133.14, 126.49, 125.72, 125.17, 122.35, 118.20, 116.34, 96.20, 52.55, 48.15, 29.90, 29.54,

25.38, 24.54. HRMS (ESI)  $m/z$  calcd for  $C_{21}H_{29}N_2O_3^+$  (M+H)<sup>+</sup> 357.2173, found 357.2177.

***(Z)*-3-((*tert*-butylamino)methylene)-6-methyl-4-oxo-*N*-(2,4,4-trimethylpentan-2-yl)chromane-2-carboxamide**

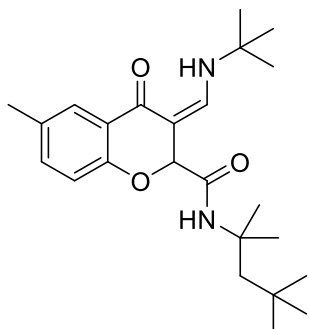

**5r**, 95 mg, yellow solid, 79% (EA/Hex = 20%,  $R_f$  = 0.3), <sup>1</sup>H NMR (400 MHz, CDCl<sub>3</sub>)  $\delta$  10.76 (d,  $J$  = 13.2 Hz, 1H), 7.65 (s, 1H), 7.30 (d,  $J$  = 13.4 Hz, 1H), 7.16 (d,  $J$  = 8.3 Hz, 1H), 6.81 (d,  $J$  = 8.3 Hz, 1H), 6.37 (s, 1H), 5.10 (d,  $J$  = 0.9 Hz, 1H), 2.29 (s, 3H), 1.66 (s, 2H), 1.36 (d,  $J$  = 7.9 Hz, 6H), 1.33 (d,  $J$  = 1.7 Hz, 9H), 0.89 (d,  $J$  = 1.4 Hz, 9H). <sup>13</sup>C NMR (101 MHz, CDCl<sub>3</sub>)  $\delta$  179.47, 168.79, 154.42, 148.70, 134.18, 131.67, 126.42, 123.31, 116.14, 95.88, 78.42, 55.12, 52.73, 51.92, 31.54, 31.48, 31.35, 29.99, 29.14, 28.78, 28.67, 20.57. HRMS (ESI)  $m/z$  calcd for  $C_{24}H_{37}N_2O_3^+$  (M+H)<sup>+</sup> 401.2799, found 401.2800.

***(Z)*-3-((*tert*-butylamino)methylene)-6,8-dichloro-4-oxo-*N*-(2,4,4-trimethylpentan-2-yl)chromane-2-carboxamide**

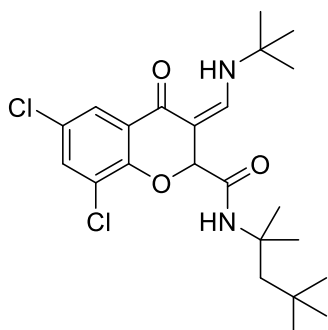

**5s**, 113 mg, yellow solid, 83% (EA/Hex = 20%,  $R_f$  = 0.3), <sup>1</sup>H NMR (400 MHz, CDCl<sub>3</sub>)  $\delta$  9.63 (d,  $J$  = 2.9 Hz, 1H), 7.73 (d,  $J$  = 1.2 Hz, 1H), 7.49 (d,  $J$  = 3.3 Hz, 1H), 7.41 (s, 1H), 7.34 (d,  $J$  = 5.1 Hz, 1H), 5.18 (s, 1H), 1.67 (s, 2H) 1.46 (s, 6H), 1.36 (s,

9H), 1.00 (s, 9H).  $^{13}\text{C}$  NMR (101 MHz,  $\text{CDCl}_3$ )  $\delta$  176.12, 167.96, 156.12, 150.34, 133.93, 132.41, 129.13, 124.82, 123.17, 78.80, 51.21, 31.75, 31.43, 29.92, 29.35. HRMS (ESI)  $m/z$  calcd for  $\text{C}_{23}\text{H}_{33}\text{Cl}_2\text{N}_2\text{O}_3^+$  ( $\text{M}+\text{H}$ ) $^+$  455.1863, found 455.1863.

***(Z)*-3-((*tert*-butylamino)methylene)-6-chloro-4-oxo-*N*-(2,4,4-trimethylpentan-2-yl)chromane-2-carboxamide**

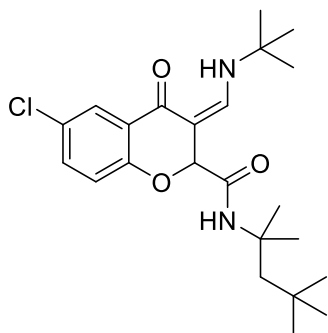

**5t**, 89mg, yellow solid, 71% (EA/Hex = 20%,  $R_f$  = 0.3),  $^1\text{H}$  NMR (400 MHz,  $\text{CDCl}_3$ )  $\delta$  10.83 (d,  $J$  = 12.7 Hz, 1H), 7.84 (s, 1H), 7.34 (dd,  $J$  = 17.9, 11.1 Hz, 2H), 6.89 (d,  $J$  = 8.2 Hz, 1H), 6.34 (s, 1H), 5.17 (s, 1H), 1.70 (s, 2H), 1.40 (d,  $J$  = 6.9 Hz, 6H), 1.36 (s, 9H), 0.93 (s, 9H).  $^{13}\text{C}$  NMR (101 MHz,  $\text{CDCl}_3$ )  $\delta$  177.75, 168.31, 154.93, 149.31, 133.10, 127.72, 126.18, 124.86, 118.01, 95.38, 78.58, 55.32, 53.07, 51.98, 31.62, 31.42, 30.00, 29.16, 28.73. HRMS (ESI)  $m/z$  calcd for  $\text{C}_{23}\text{H}_{34}\text{ClN}_2\text{O}_3^+$  ( $\text{M}+\text{H}$ ) $^+$  421.2252, found 421.2250.

***(Z)*-*N*-(*tert*-butyl)-3-((cyclopropylamino)methylene)-4-oxochromane-2-carboxamide**

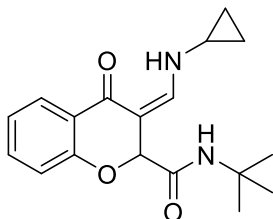

**5u**, 44 mg, light green solid, 47% (EA/Hex = 30%,  $R_f$  = 0.35),  $^1\text{H}$  NMR (400 MHz,  $\text{CDCl}_3$ )  $\delta$  10.32 (d,  $J$  = 12.3 Hz, 1H), 7.87 (d,  $J$  = 7.8 Hz, 1H), 7.42 – 7.35 (m, 1H), 7.20 (s, 1H), 7.05 (t,  $J$  = 7.5 Hz, 1H), 6.94 (d,  $J$  = 8.2 Hz, 1H), 6.28 (s, 1H), 5.14 (s, 1H), 2.82 (s, 1H), 1.30 (s, 9H), 0.77 – 0.73 (m, 2H), 0.71 (dd,  $J$  = 4.8, 3.5 Hz, 2H).  $^{13}\text{C}$  NMR (100 MHz,  $\text{CDCl}_3$ )  $\delta$  169.18, 156.97, 153.18, 134.06, 127.08, 123.87,

122.72, 116.81, 97.28, 78.70, 51.62, 29.78, 28.96, 6.93. HRMS (ESI)  $m/z$  calcd for  $C_{18}H_{23}N_2O_3^+$  ( $M+H$ ) $^+$  315.1703, found 315.1701.

***(Z)*-3-((butylamino)methylene)-N-(2,6-dimethylphenyl)-4-oxochromane-2-carboxamide**

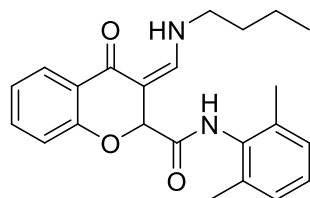

**5v**, 24 mg, white solid, 21% (EA/Hex = 30%,  $R_f$  = 0.3),  $^1H$  NMR (400 MHz,  $CDCl_3$ )  $\delta$  10.45 (d,  $J$  = 12.7 Hz, 1H), 7.94 (d,  $J$  = 7.9 Hz, 1H), 7.65 (s, 1H), 7.40 (t,  $J$  = 7.8 Hz, 1H), 7.22 (d,  $J$  = 13.1 Hz, 1H), 7.08 (dd,  $J$  = 14.9, 7.5 Hz, 2H), 7.02 (d,  $J$  = 7.8 Hz, 2H), 5.47 (s, 1H), 3.29 (dd,  $J$  = 13.2, 6.6 Hz, 2H), 2.03 (s, 6H), 1.38 (dd,  $J$  = 15.0, 7.6 Hz, 2H), 1.24 (t,  $J$  = 6.7 Hz, 2H), 0.91 (t,  $J$  = 7.3 Hz, 3H).  $^{13}C$  NMR (100 MHz,  $CDCl_3$ )  $\delta$  180.55, 155.51, 153.31, 151.26, 133.67, 126.59, 124.00, 122.54, 116.79, 96.79, 71.38, 62.59, 49.21, 32.85, 30.00, 19.66, 13.59. HRMS (ESI)  $m/z$  calcd for  $C_{23}H_{27}N_2O_3^+$  ( $M+H$ ) $^+$  379.2016, found 379.2021.

***(Z)*-4-oxo-3-(pyrrolidin-1-ylmethylene)-N-(2,4,4-trimethylpentan-2-yl)chromane-2-carboxamide**

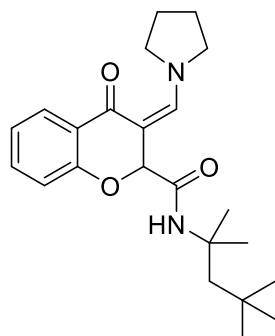

**5w**, 72 mg, light green solid, 63% (EA/Hex = 40%,  $R_f$  = 0.2),  $^1H$  NMR (400 MHz,  $CDCl_3$ )  $\delta$  8.08 (s, 1H), 7.95 (d,  $J$  = 7.6 Hz, 1H), 7.42 – 7.34 (m, 1H), 7.06 – 6.98 (m, 1H), 6.92 (d,  $J$  = 8.4 Hz, 1H), 6.08 (s, 1H), 5.77 (s, 1H), 3.86 (s, 2H), 3.53 (s, 2H), 1.96 (s, 2H), 1.21 (s, 6H), 0.97 (d,  $J$  = 12.2 Hz, 2H), 0.84 (d,  $J$  = 13.2 Hz, 2H), 0.76 (s, 9H).  $^{13}C$  NMR (101 MHz,  $CDCl_3$ )  $\delta$  178.30, 169.90, 156.82, 146.98, 133.64, 127.89,



122.10, 116.02, 75.67, 55.11, 51.27, 31.37, 31.14, 29.66, 29.35, 28.84. HRMS (ESI)  $m/z$  calcd for  $C_{23}H_{33}N_2O_3^+$  (M+H)<sup>+</sup> 385.2486, found 385.2486.

**3-((4-methoxypiperidin-1-yl)methylene)-4-oxo-N-(2,4,4-trimethylpentan-2-yl)chromane-2-carboxamide**

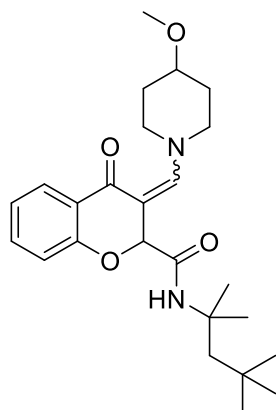

**5x**, 84 mg, light green solid, 66% (EA/Hex = 40%,  $R_f$  = 0.2), <sup>1</sup>H NMR (400 MHz, CDCl<sub>3</sub>)  $\delta$  7.93 (d,  $J$  = 7.5 Hz, 1H), 7.82 (s, 1H), 7.38 (t,  $J$  = 7.6 Hz, 1H), 7.02 (t,  $J$  = 7.5 Hz, 1H), 6.92 (d,  $J$  = 8.2 Hz, 1H), 6.10 (s, 1H), 5.77 (s, 1H), 3.87 – 3.68 (m, 2H), 3.59 – 3.41 (m, 3H), 3.35 (s, 3H), 1.94 (dd,  $J$  = 16.1, 9.7 Hz, 2H), 1.75 (d,  $J$  = 11.4 Hz, 2H), 1.24 (s, 2H), 1.23 (d,  $J$  = 8.4 Hz, 6H), 0.77 (s, 9H). <sup>13</sup>C NMR (101 MHz, CDCl<sub>3</sub>)  $\delta$  178.83, 169.39, 149.65, 133.75, 127.83, 122.17, 116.11, 97.40, 75.90, 73.92, 55.78, 55.18, 51.21, 31.49, 31.39, 31.30, 31.21, 31.13, 30.71, 29.67, 29.36, 28.87, 28.78. HRMS (ESI)  $m/z$  calcd for  $C_{25}H_{37}N_2O_4^+$  (M+H)<sup>+</sup> 429.2478, found 429.2477.

**3-(morpholinomethylene)-4-oxo-N-(2,4,4-trimethylpentan-2-yl)chromane-2-carboxamide**

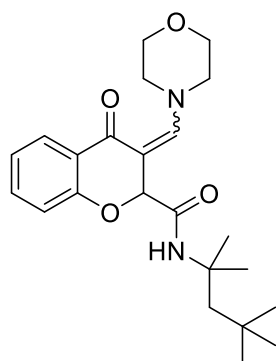

**5y**, 69 mg, light green solid, 58% (EA/Hex = 40%, Rf = 0.2), <sup>1</sup>H NMR (400 MHz, CDCl<sub>3</sub>) δ 7.94 (d, *J* = 7.7 Hz, 1H), 7.76 (s, 1H), 7.40 (t, *J* = 7.8 Hz, 1H), 7.03 (t, *J* = 7.5 Hz, 1H), 6.93 (d, *J* = 8.2 Hz, 1H), 6.10 (s, 1H), 5.76 (s, 1H), 3.86 – 3.74 (m, 6H), 3.49 (dd, *J* = 8.5, 5.1 Hz, 2H), 1.24 (s, 2H), 1.22 (s, 6H), 0.76 (s, 9H). <sup>13</sup>C NMR (101 MHz, CDCl<sub>3</sub>) δ 178.92, 169.34, 157.19, 149.62, 134.02, 127.94, 123.17, 122.30, 116.08, 98.14, 75.74, 66.53, 55.24, 51.53, 51.23, 31.49, 31.38, 31.13, 29.38, 28.84. HRMS (ESI) *m/z* calcd for C<sub>23</sub>H<sub>33</sub>N<sub>2</sub>O<sub>4</sub><sup>+</sup> (M+H)<sup>+</sup> 401.2435, found 401.2330.

**3-formyl-4-oxo-N-(2,4,4-trimethylpentan-2-yl)-4H-chromene-2-carboxamide**

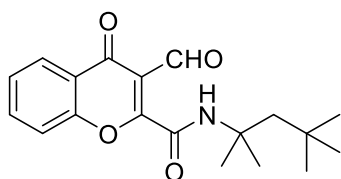

**11**, 28 mg, white solid, 42% (EA/Hex = 25%, Rf = 0.25), <sup>1</sup>H NMR (400 MHz, CDCl<sub>3</sub>) δ 10.36 (s, 1H), 8.34 (dd, *J* = 8.0, 1.6 Hz, 1H), 7.83 (ddd, *J* = 8.7, 7.3, 1.7 Hz, 1H), 7.59 (td, *J* = 7.7, 1.0 Hz, 1H), 7.51 – 7.43 (m, 1H), 2.11 (s, 2H), 1.70 (s, 6H), 0.86 (s, 9H). <sup>13</sup>C NMR (100 MHz, CDCl<sub>3</sub>) δ 187.96, 175.76, 156.73, 155.59, 146.04, 135.85, 127.52, 126.42, 124.62, 121.18, 118.24, 66.59, 54.62, 31.66, 30.72, 29.35. HRMS (ESI) *m/z* calcd for C<sub>23</sub>H<sub>27</sub>N<sub>2</sub>O<sub>3</sub><sup>+</sup> (M+H)<sup>+</sup> 330.1700, found 330.1705.

**(Z)-3-((tert-butylamino)methylene)-N-(1-(4-chlorophenyl)cyclopropane-1-carbonyl)-N-(2,6-dimethylphenyl)-4-oxochromane-2-carboxamide**

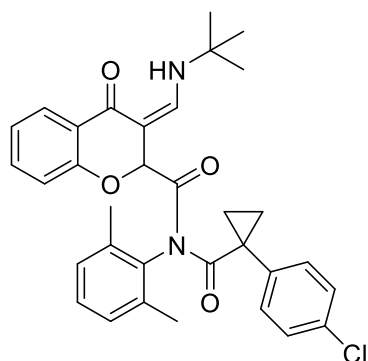

**13**, 139 mg, light green solid, 83% (EA/Hex = 20%, Rf = 0.3), <sup>1</sup>H NMR (400 MHz, CDCl<sub>3</sub>) δ 10.45 (d, *J* = 13.4 Hz, 1H), 7.75 (dd, *J* = 7.8, 1.6 Hz, 1H), 7.32 (ddd, *J* = 8.2, 7.3, 1.8 Hz, 1H), 7.07 – 6.95 (m, 2H), 6.97 – 6.87 (m, 4H), 6.68 (d, *J* = 7.3 Hz, 1H),

6.62 (d,  $J = 8.3$  Hz, 2H), 6.05 (s, 1H), 1.92 (s, 2H), 1.91 – 1.82 (m, 1H), 1.55 – 1.49 (m, 1H), 1.37 (s, 9H), 1.23 – 1.13 (m, 1H), 0.82 (ddd,  $J = 9.4, 7.2, 3.9$  Hz, 1H).  $^{13}\text{C}$  NMR (100 MHz,  $\text{CDCl}_3$ )  $\delta$  180.52, 177.01, 158.74, 148.86, 137.36, 136.73, 136.61, 135.01, 133.93, 132.67, 130.79, 128.82, 128.46, 127.97, 125.93, 123.13, 121.35, 117.04, 95.91, 79.48, 52.80, 32.33, 30.09, 18.26, 18.06, 17.71. HRMS (ESI)  $m/z$  calcd for  $\text{C}_{33}\text{H}_{34}\text{ClN}_2\text{O}_4^+$  ( $\text{M}+\text{H}$ ) $^+$  557.2202, found 557.2201.

$^1\text{H}$  NMR and  $^{13}\text{C}$  NMR spectrum of **5a**

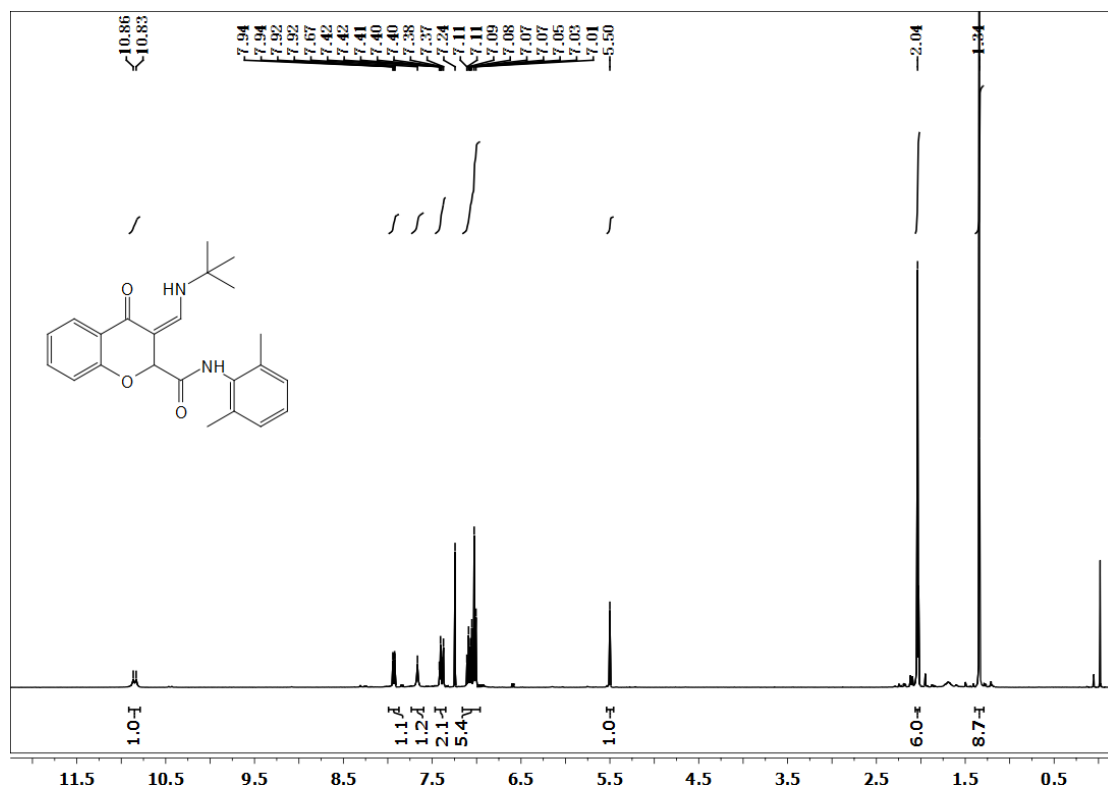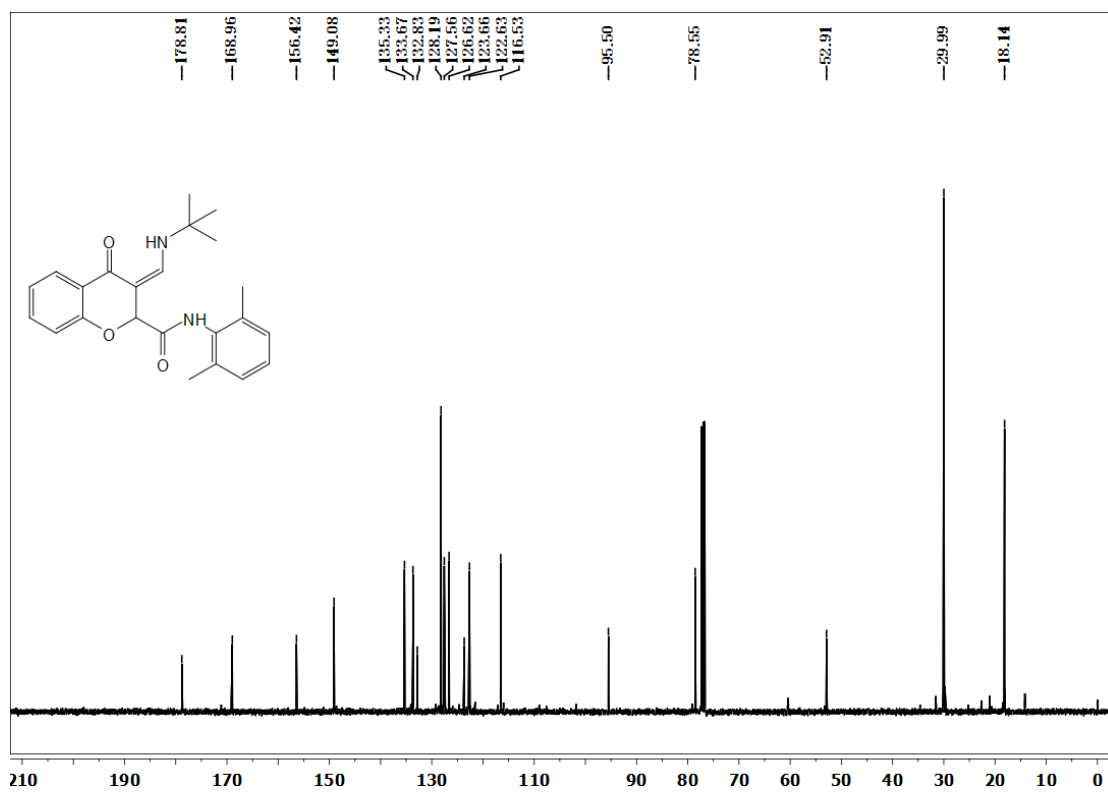

$^1\text{H}$  NMR and  $^{13}\text{C}$  NMR spectrum of **5b**

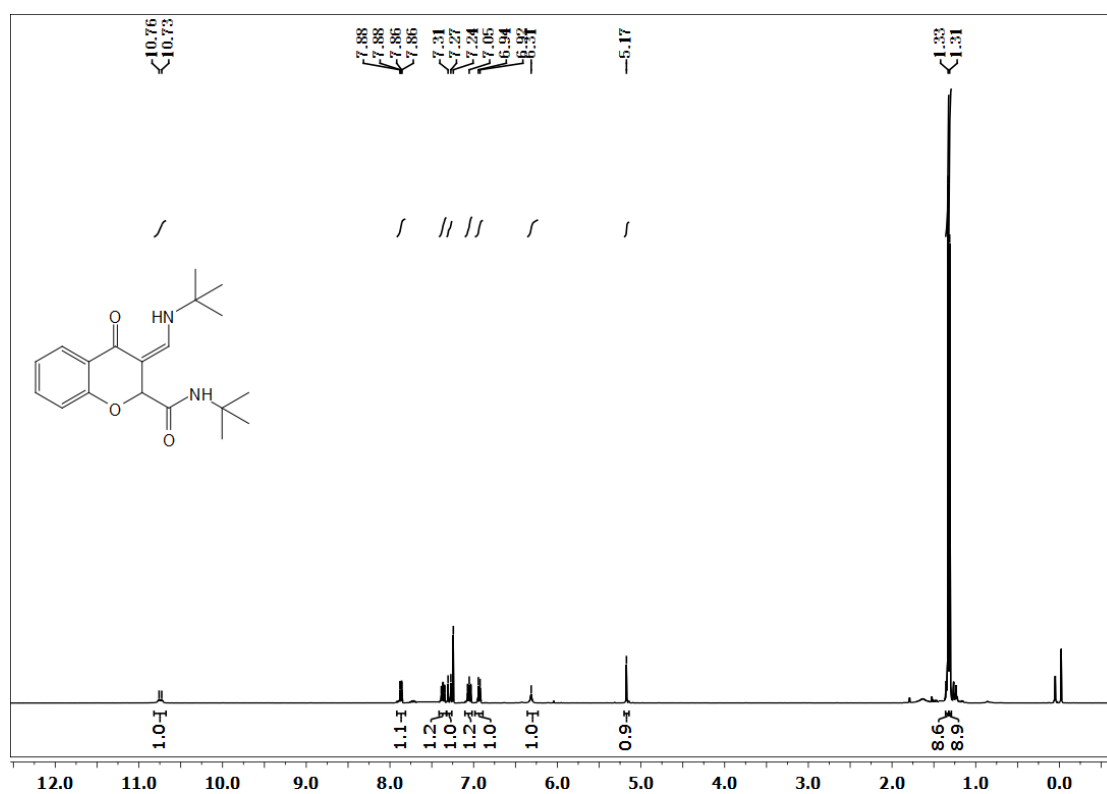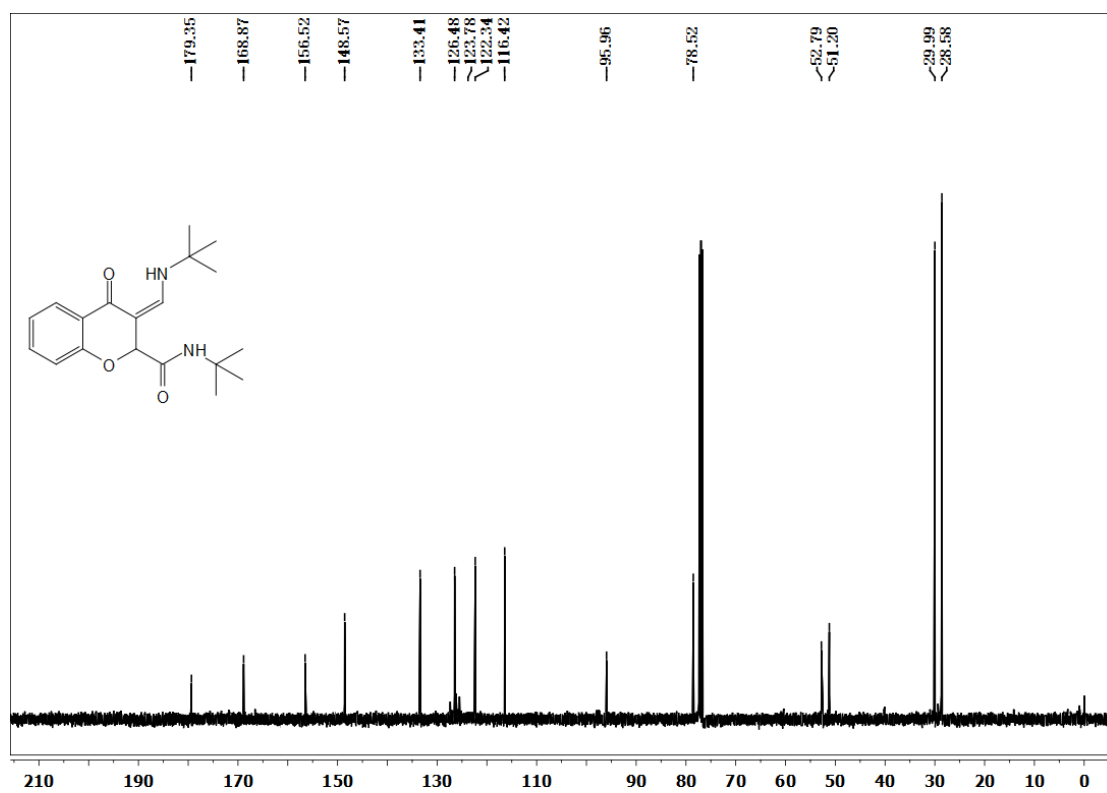

$^1\text{H}$  NMR and  $^{13}\text{C}$  NMR spectrum of **5c**

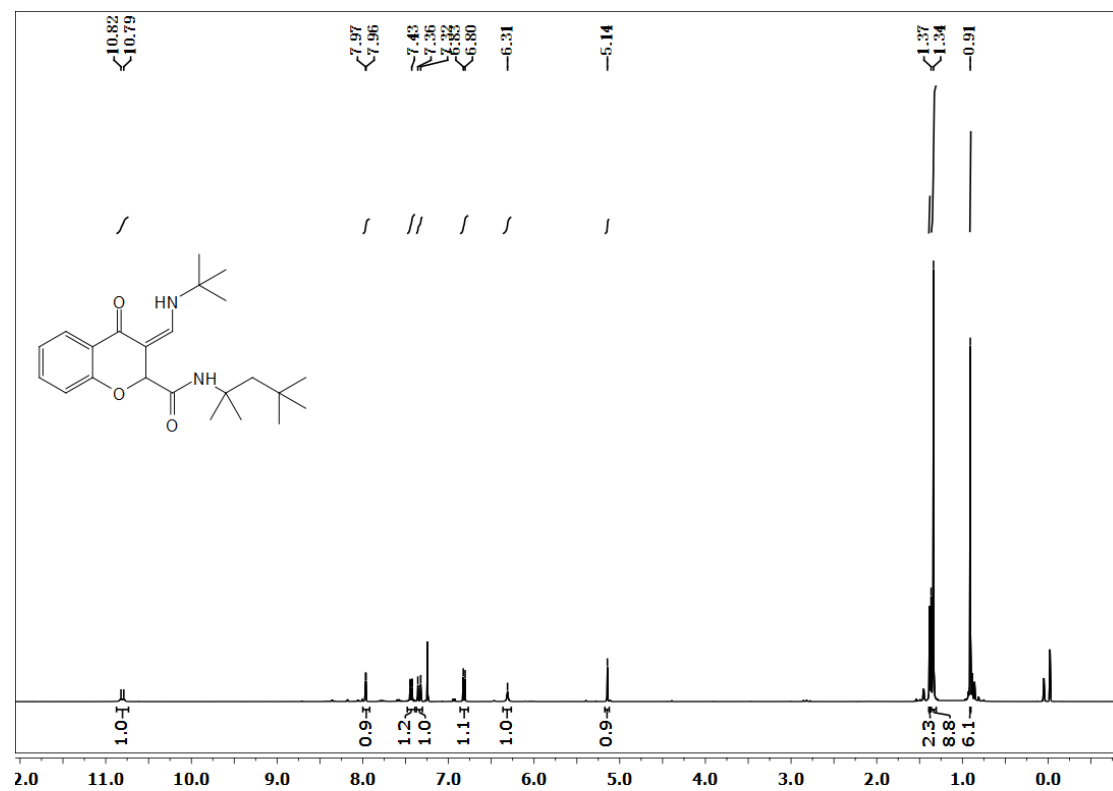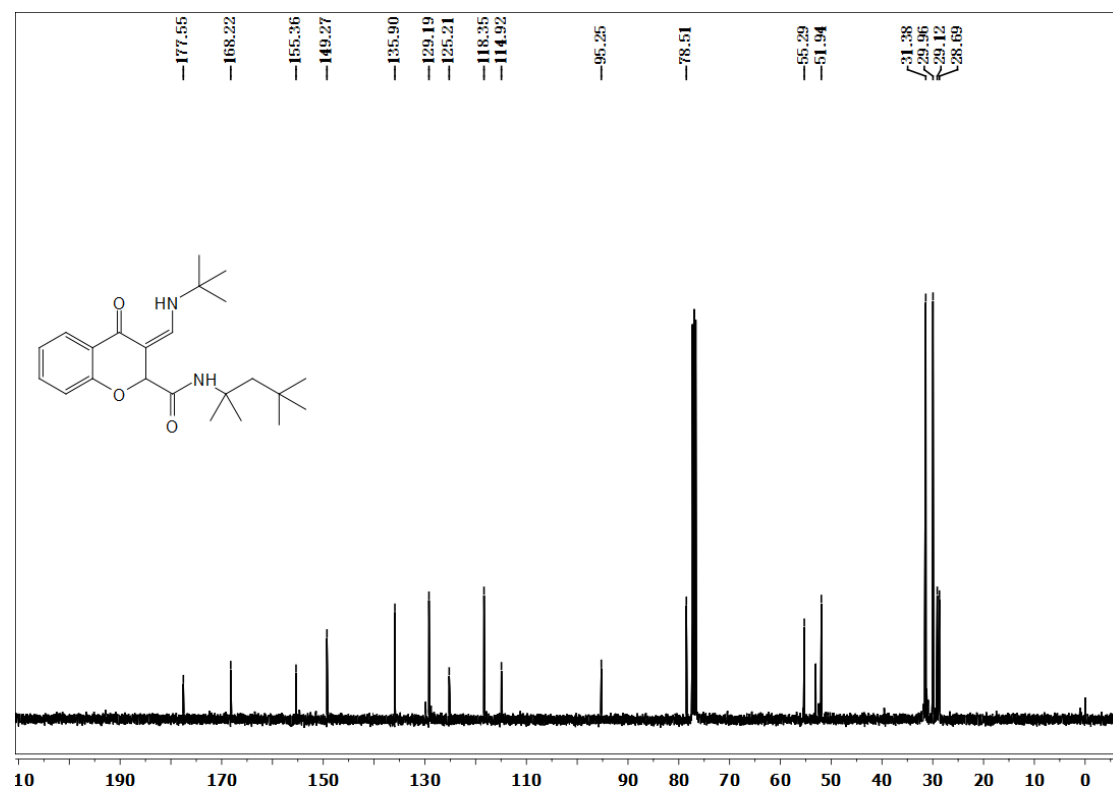

$^1\text{H}$  NMR and  $^{13}\text{C}$  NMR spectrum of **5d**

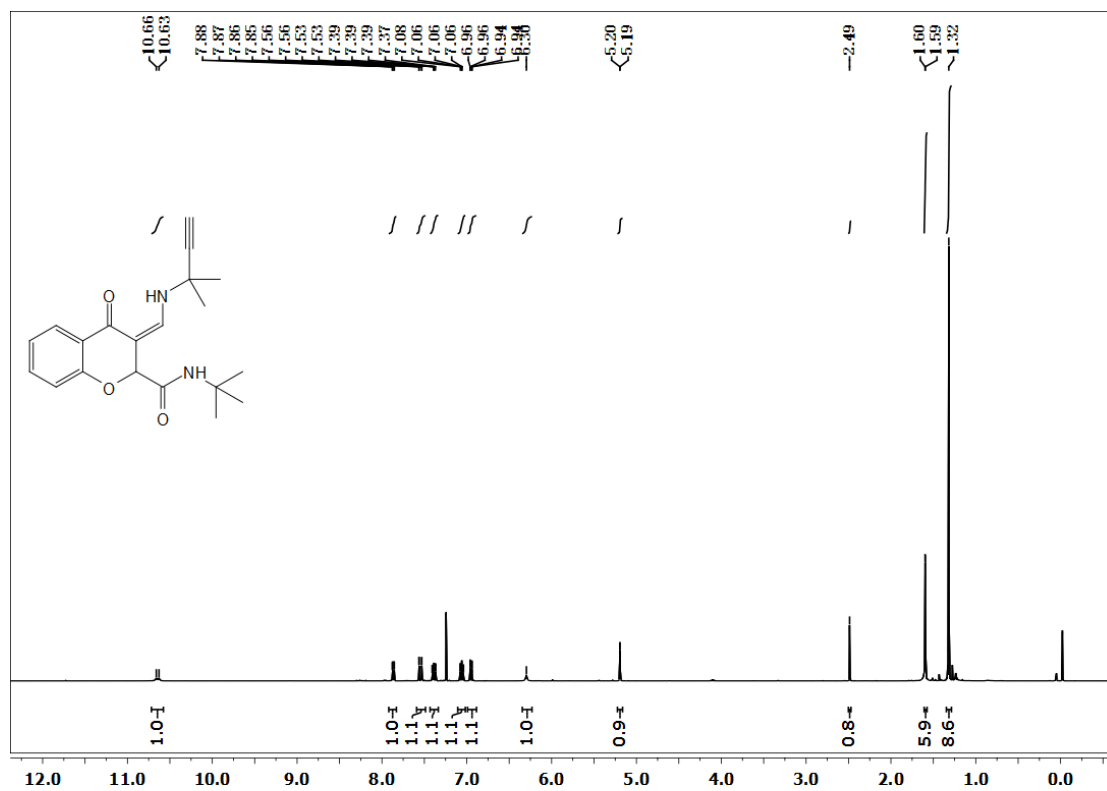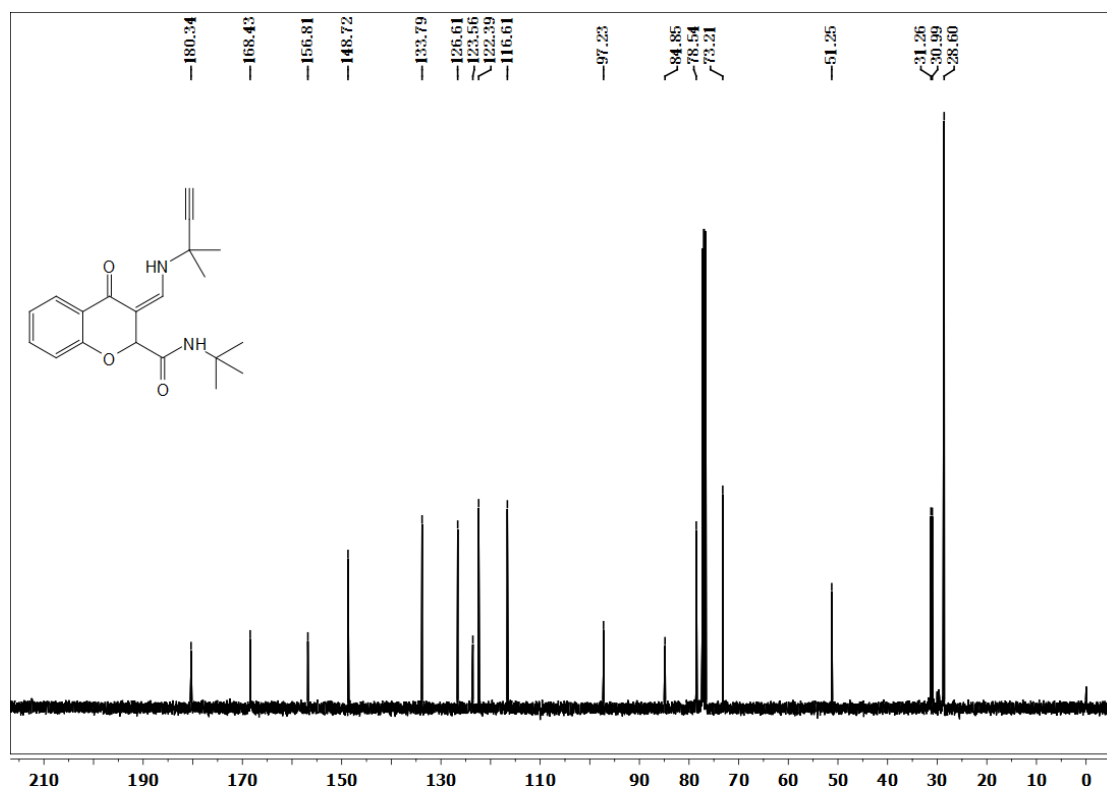

$^1\text{H}$  NMR and  $^{13}\text{C}$  NMR spectrum of **5e**

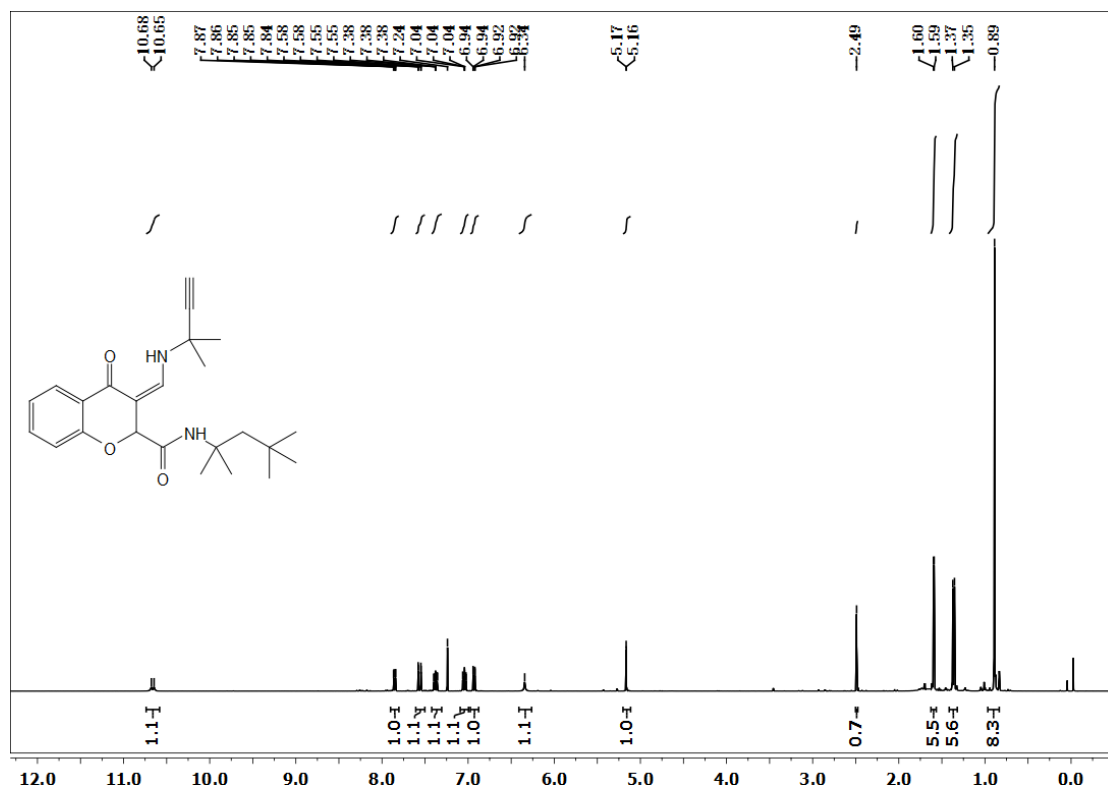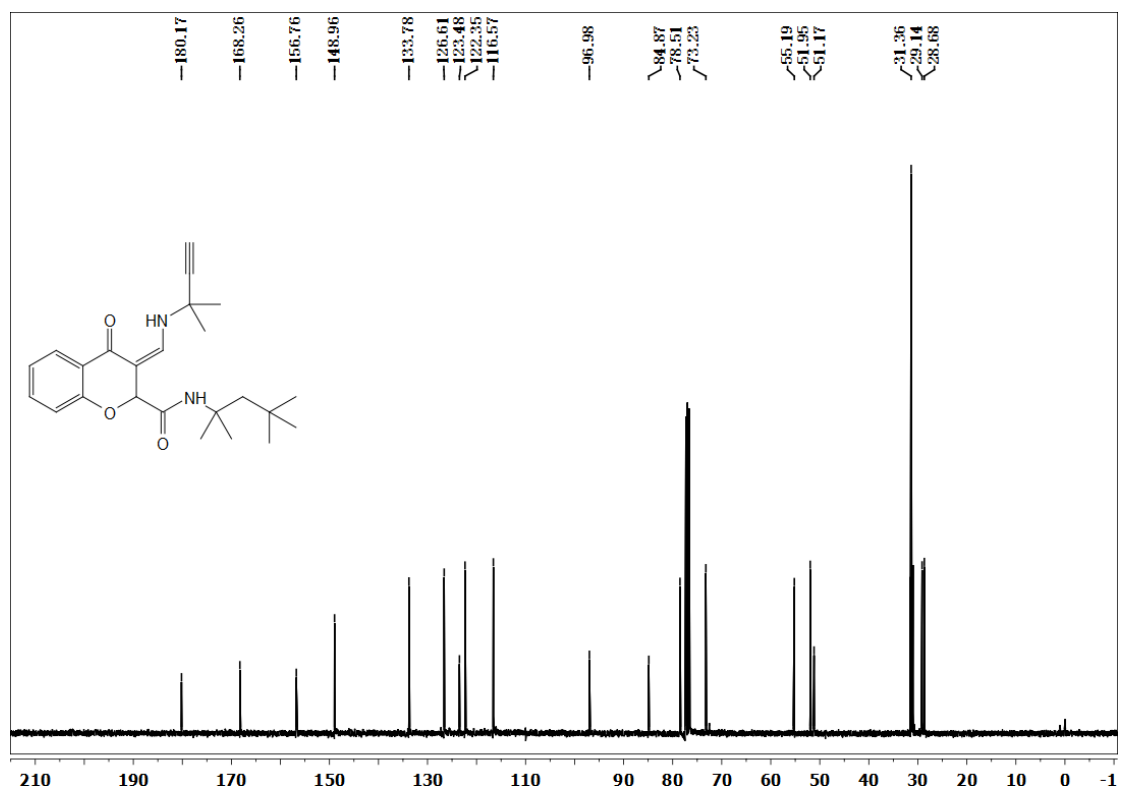



$^1\text{H}$  NMR and  $^{13}\text{C}$  NMR spectrum of **5f**

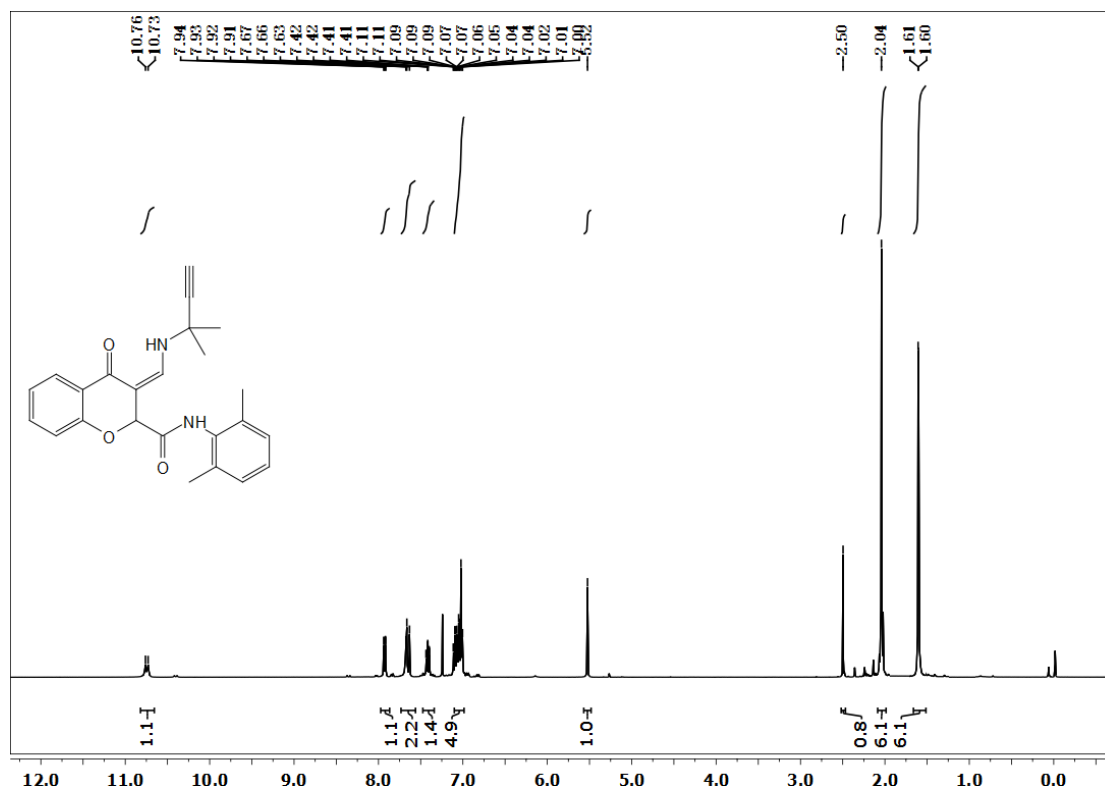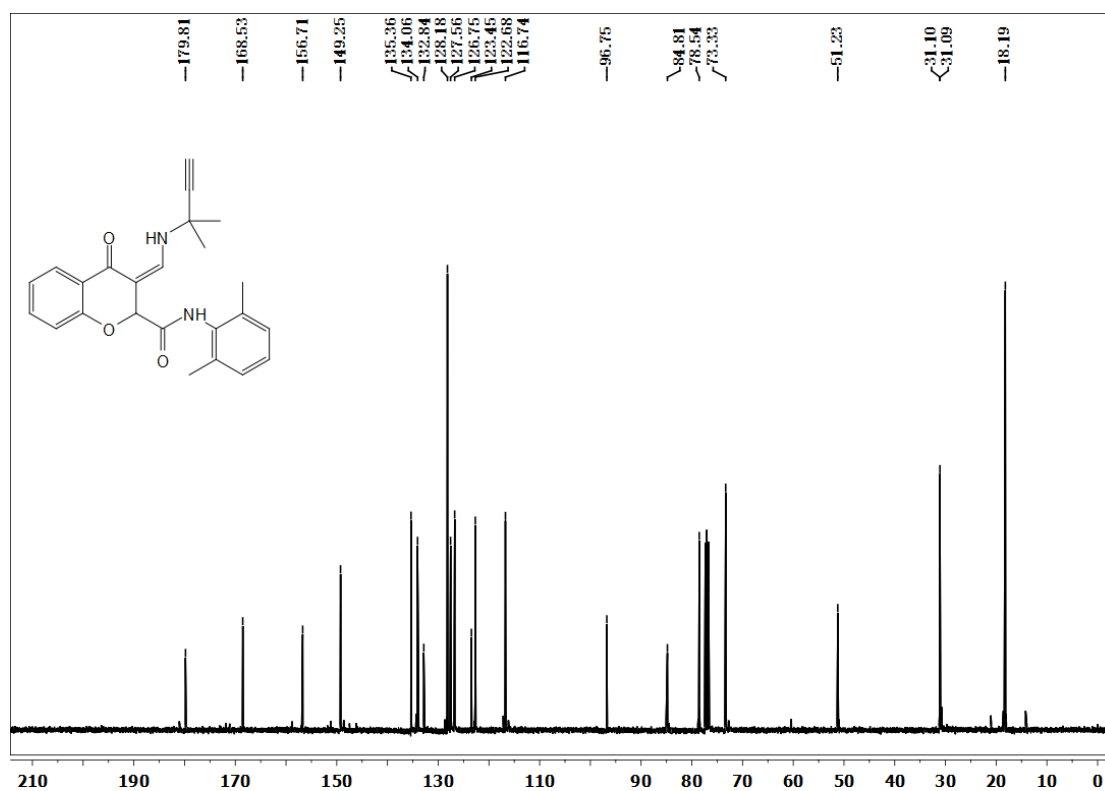

$^1\text{H}$  NMR and  $^{13}\text{C}$  NMR spectrum of **5g**

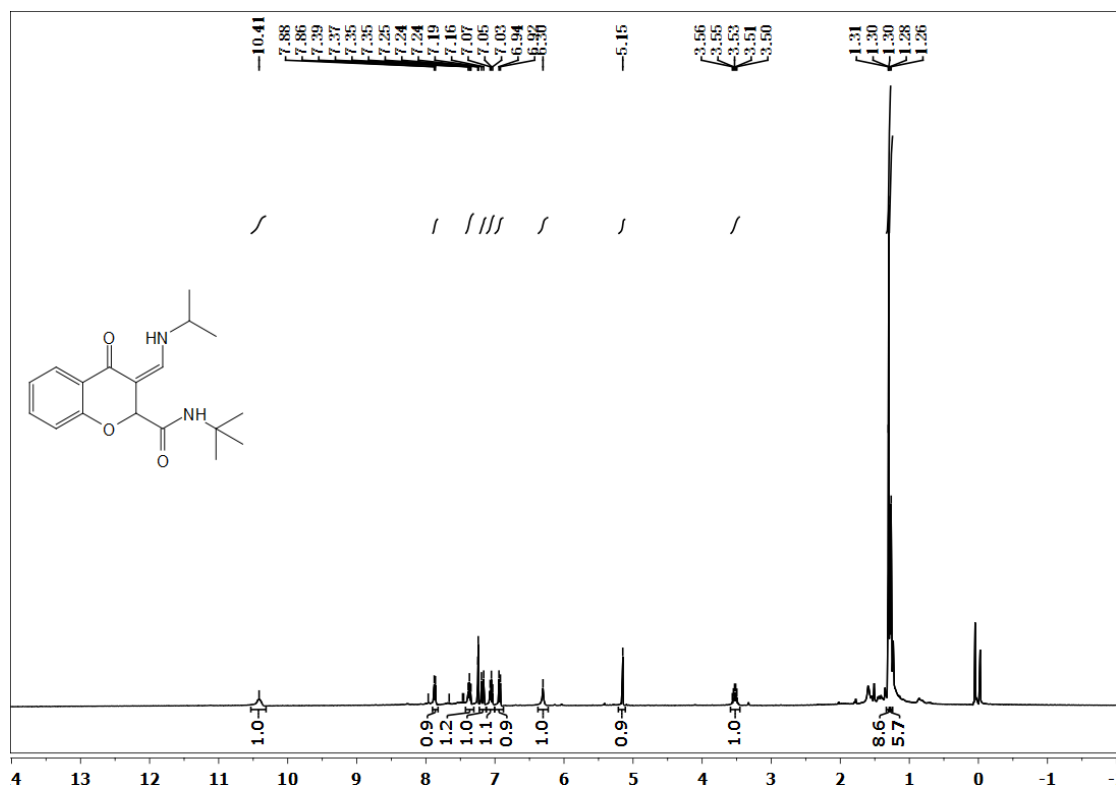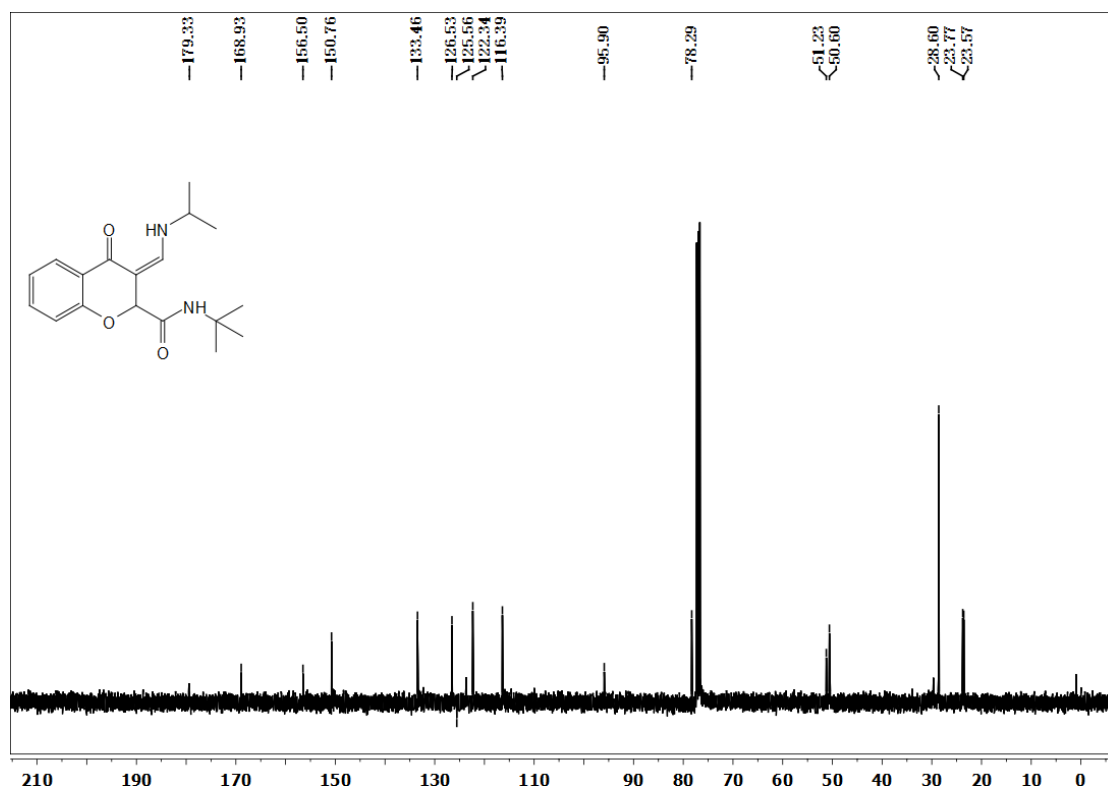

$^1\text{H}$  NMR and  $^{13}\text{C}$  NMR spectrum of **5h**

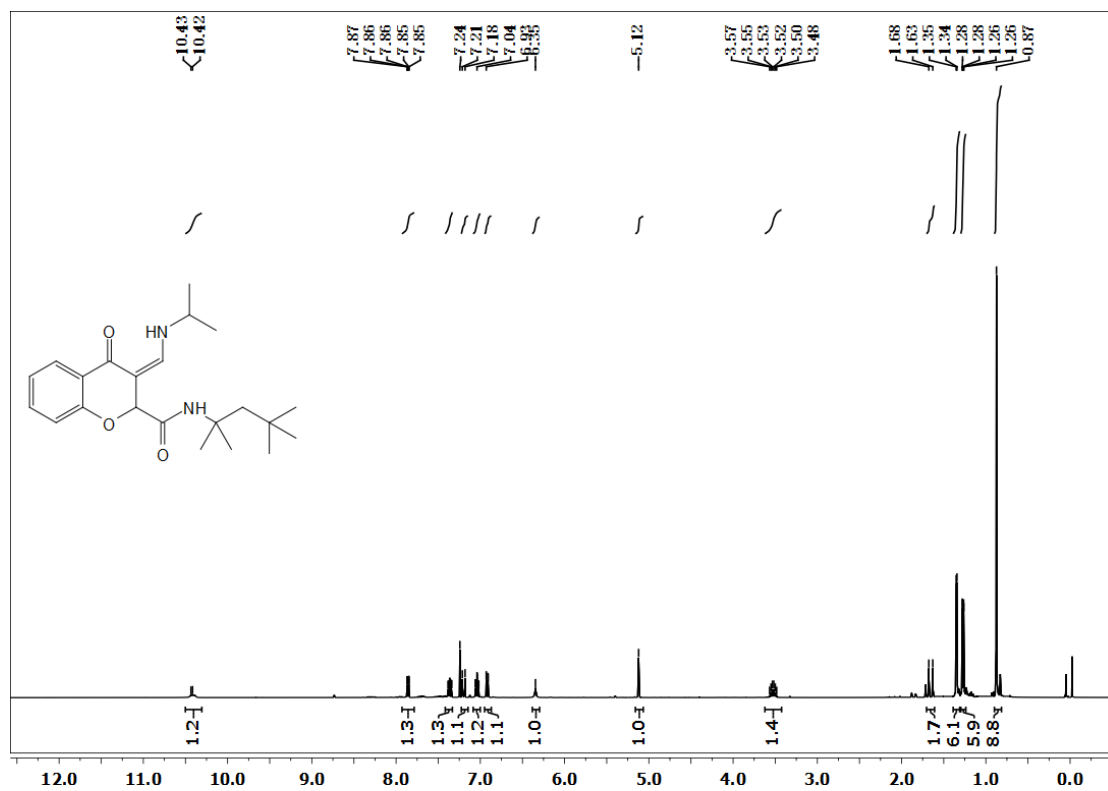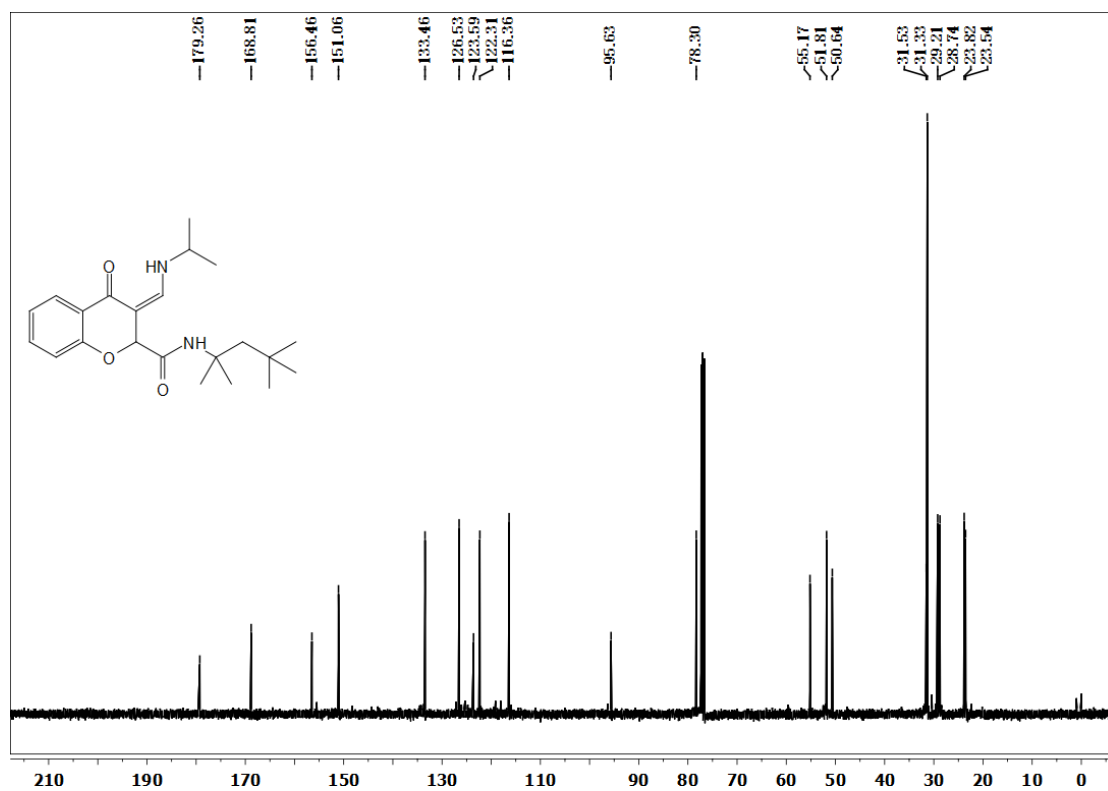

$^1\text{H}$  NMR and  $^{13}\text{C}$  NMR spectrum of **5i**

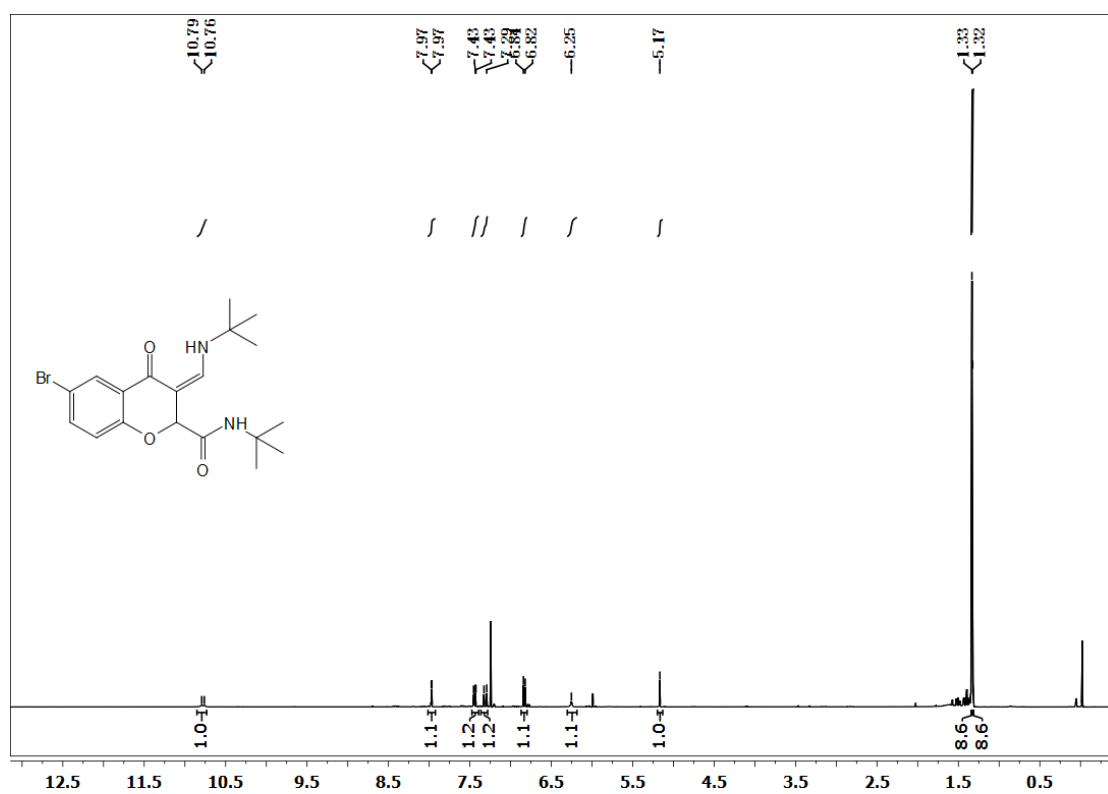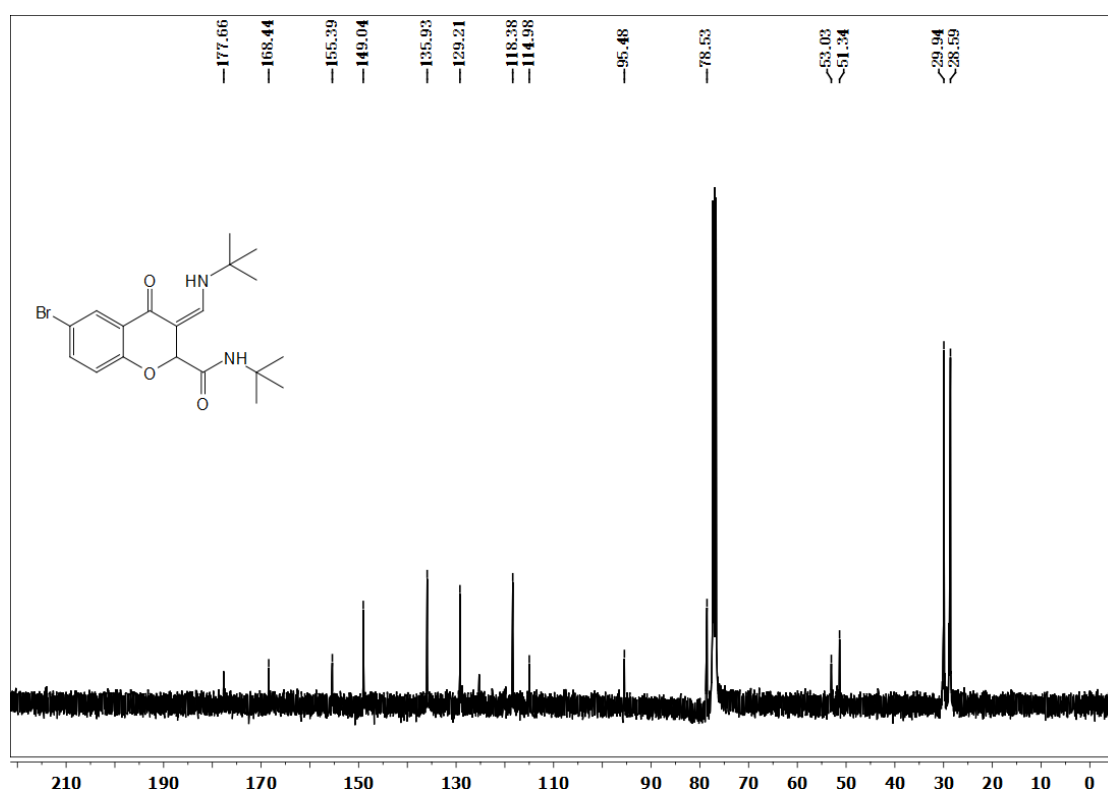

$^1\text{H}$  NMR and  $^{13}\text{C}$  NMR spectrum of **5j**

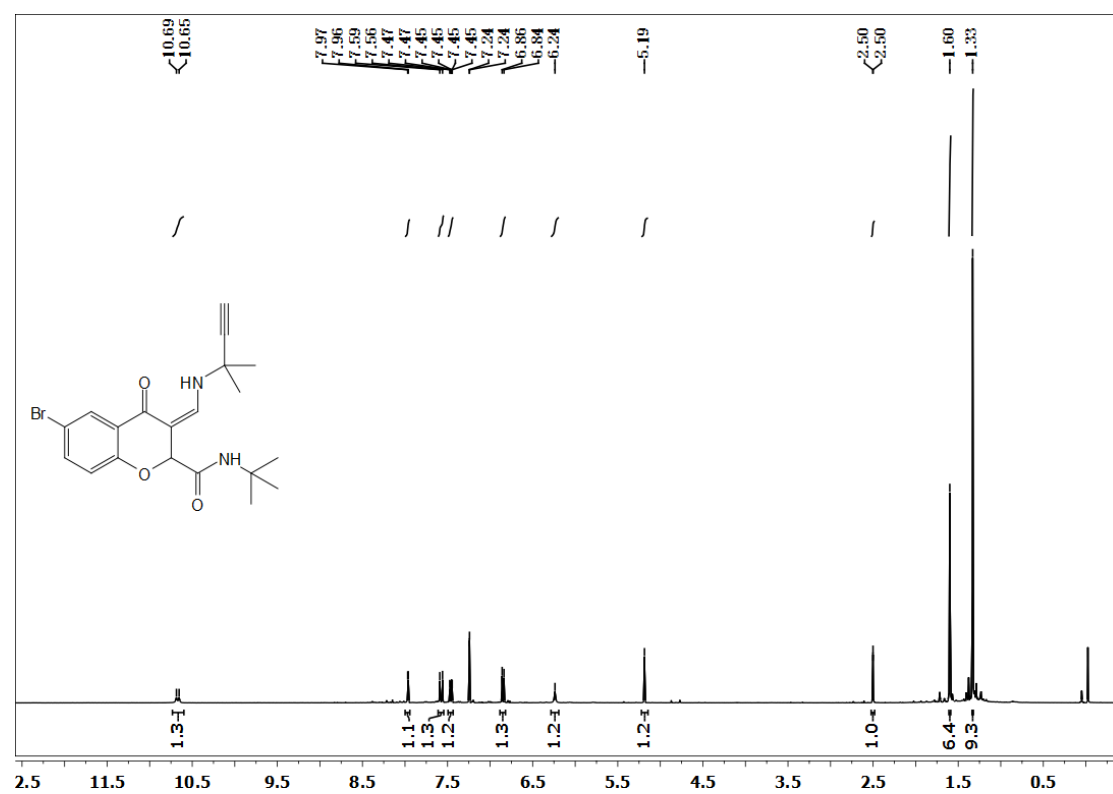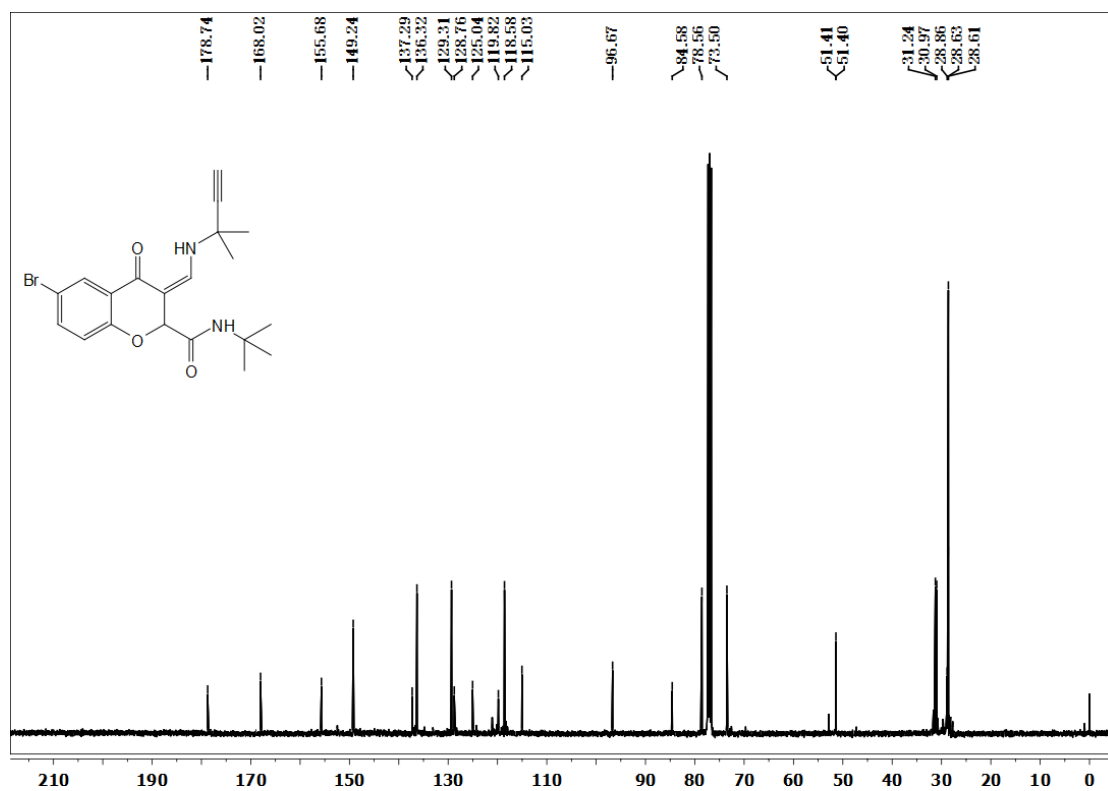

$^1\text{H}$  NMR and  $^{13}\text{C}$  NMR spectrum of **5k**

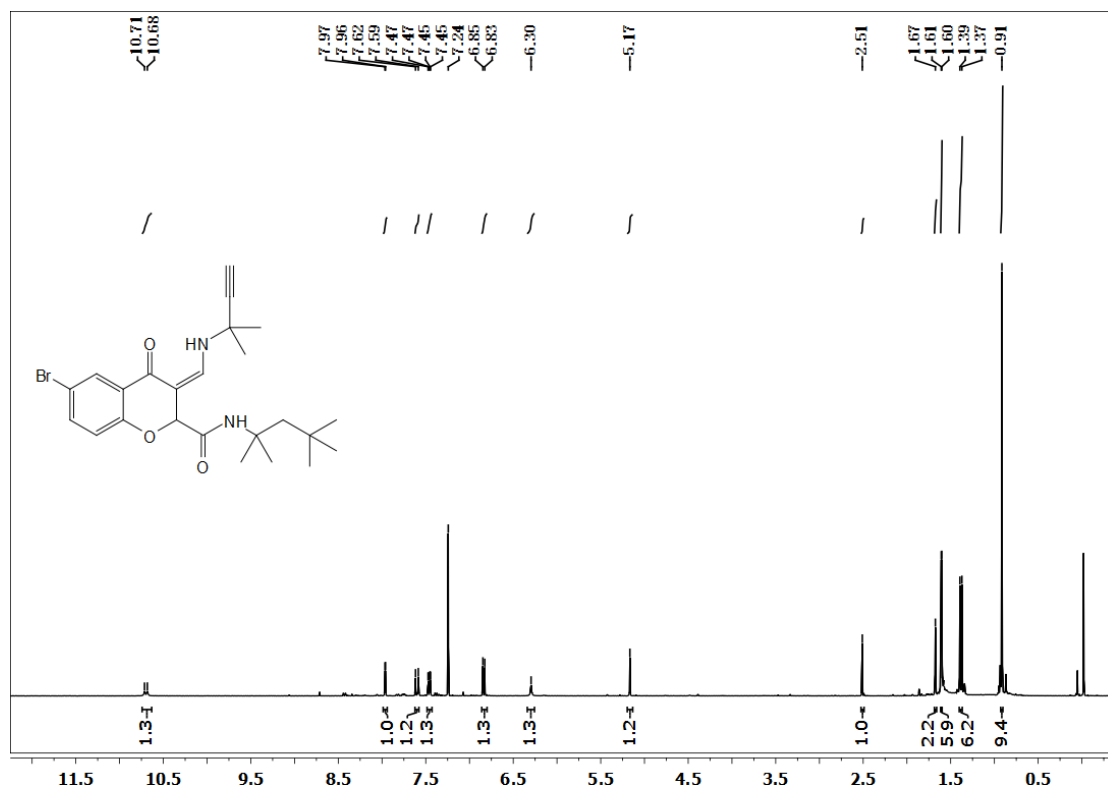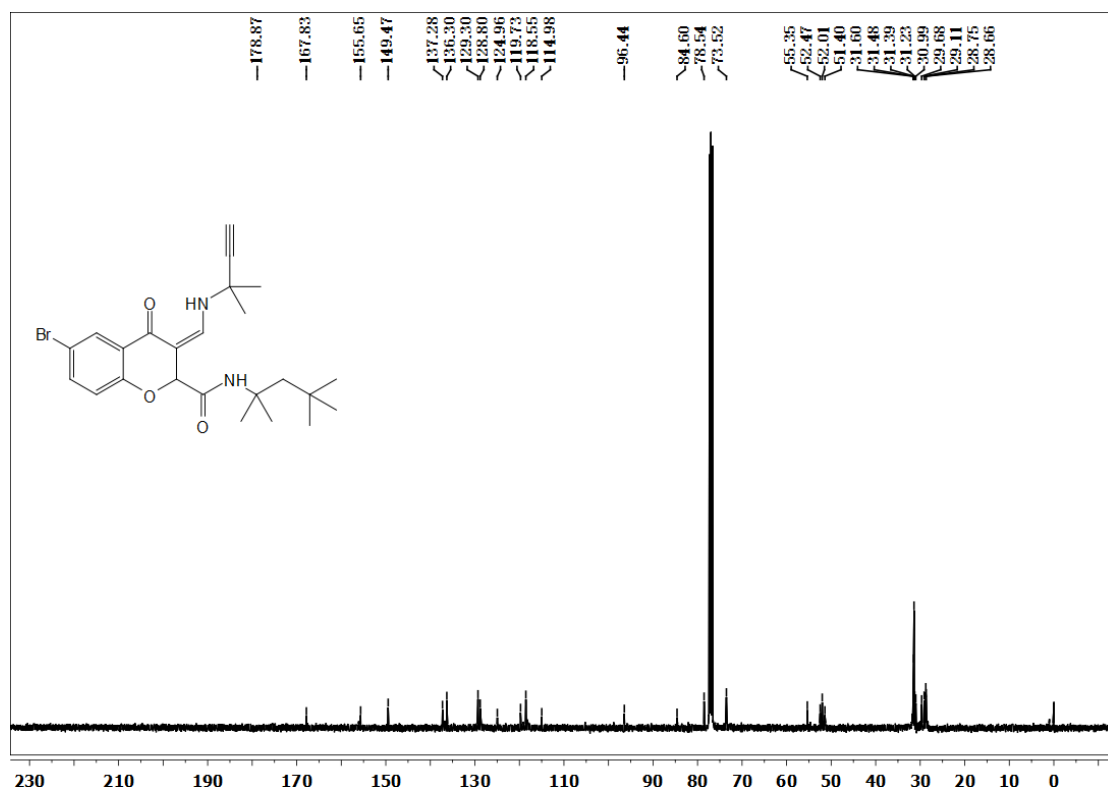

$^1\text{H}$  NMR and  $^{13}\text{C}$  NMR spectrum of **51**

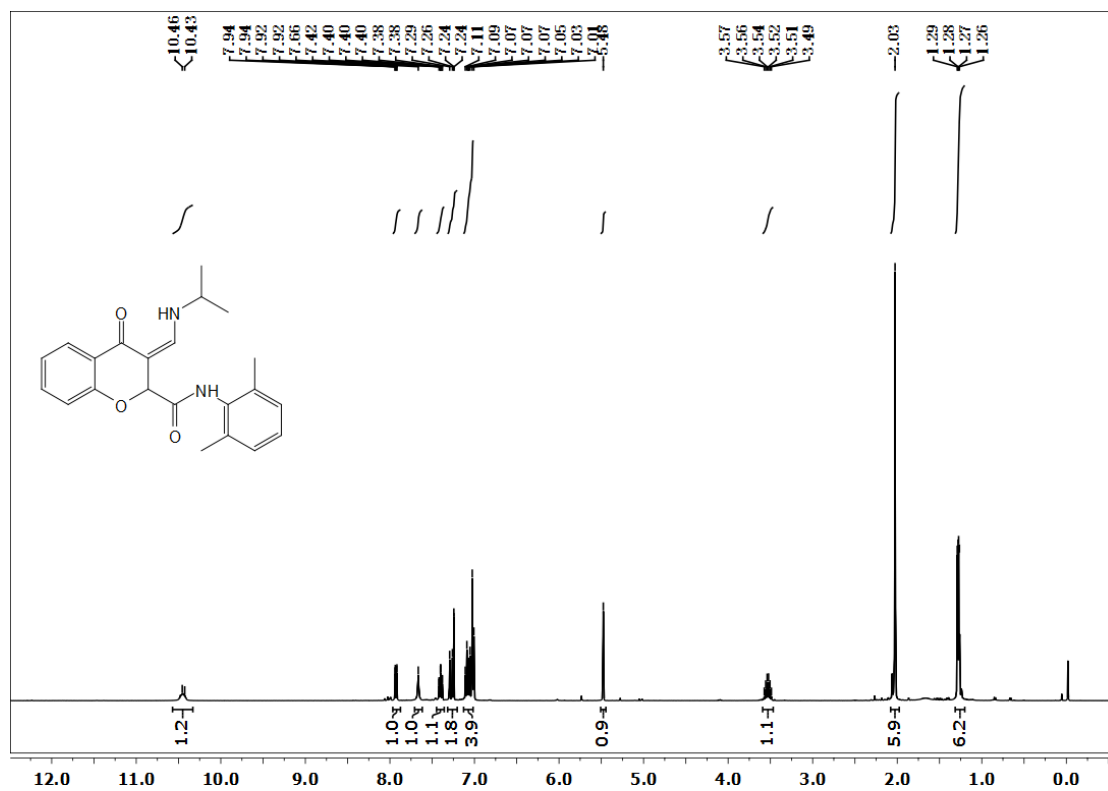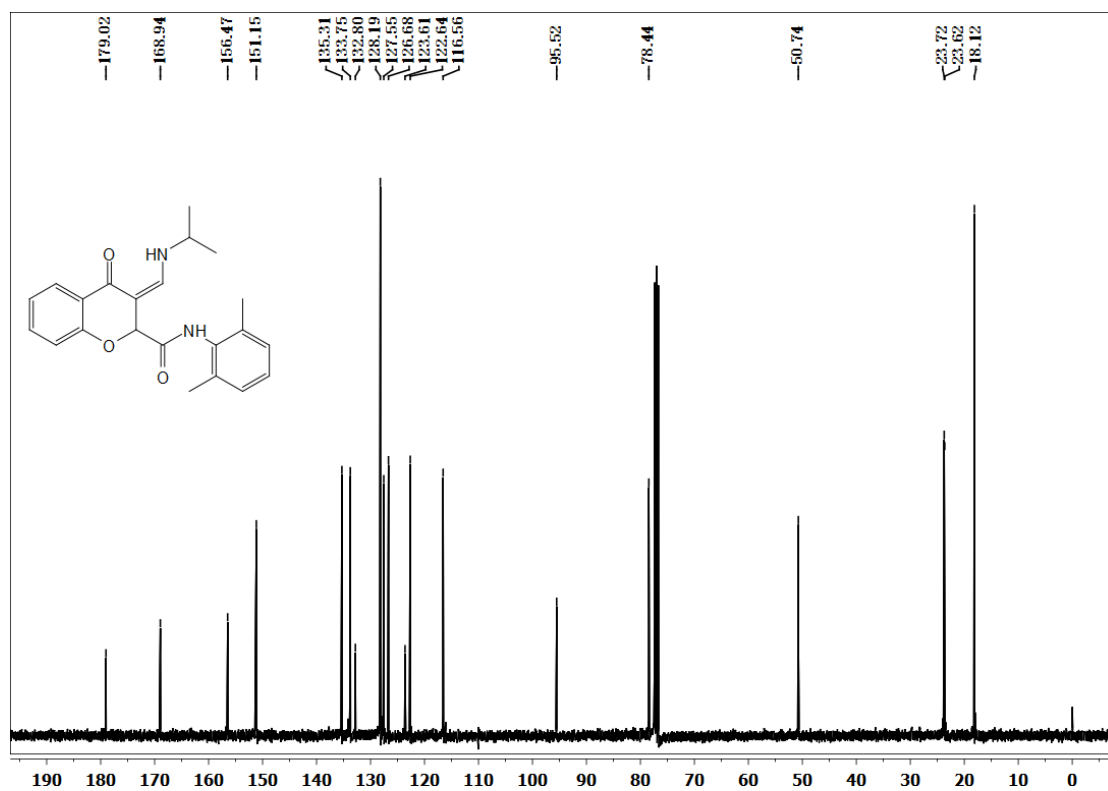

$^1\text{H}$  NMR and  $^{13}\text{C}$  NMR spectrum of **5m**

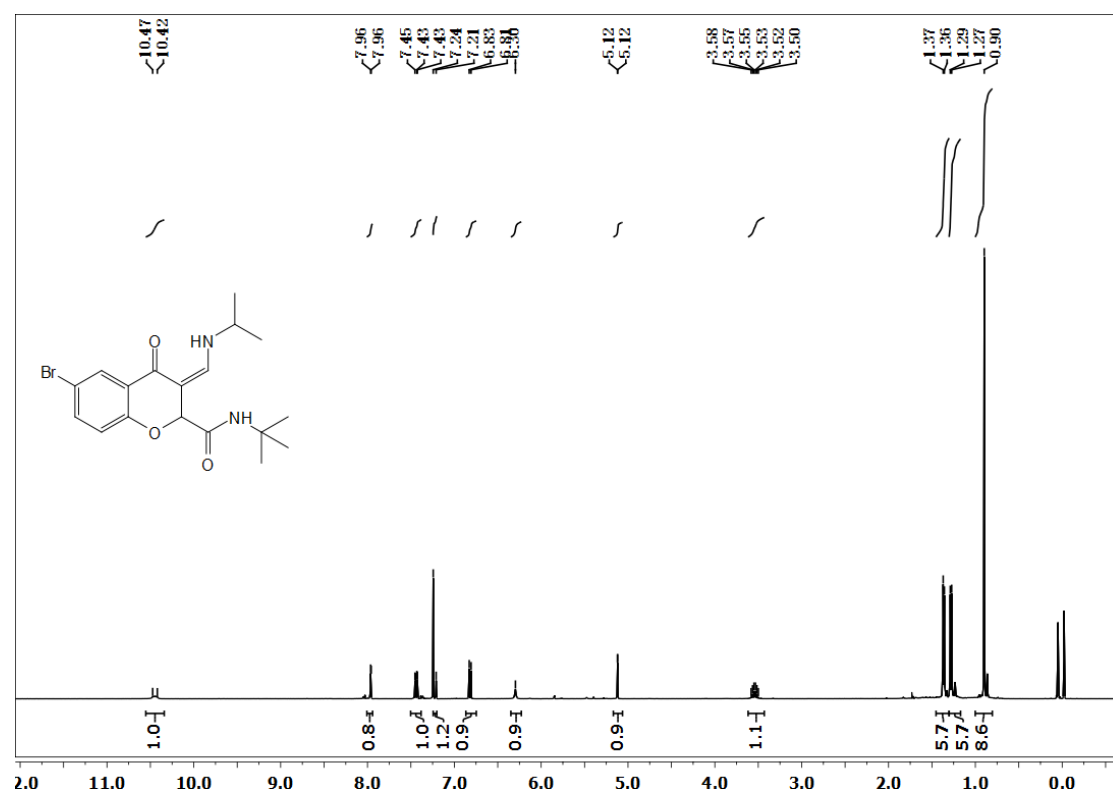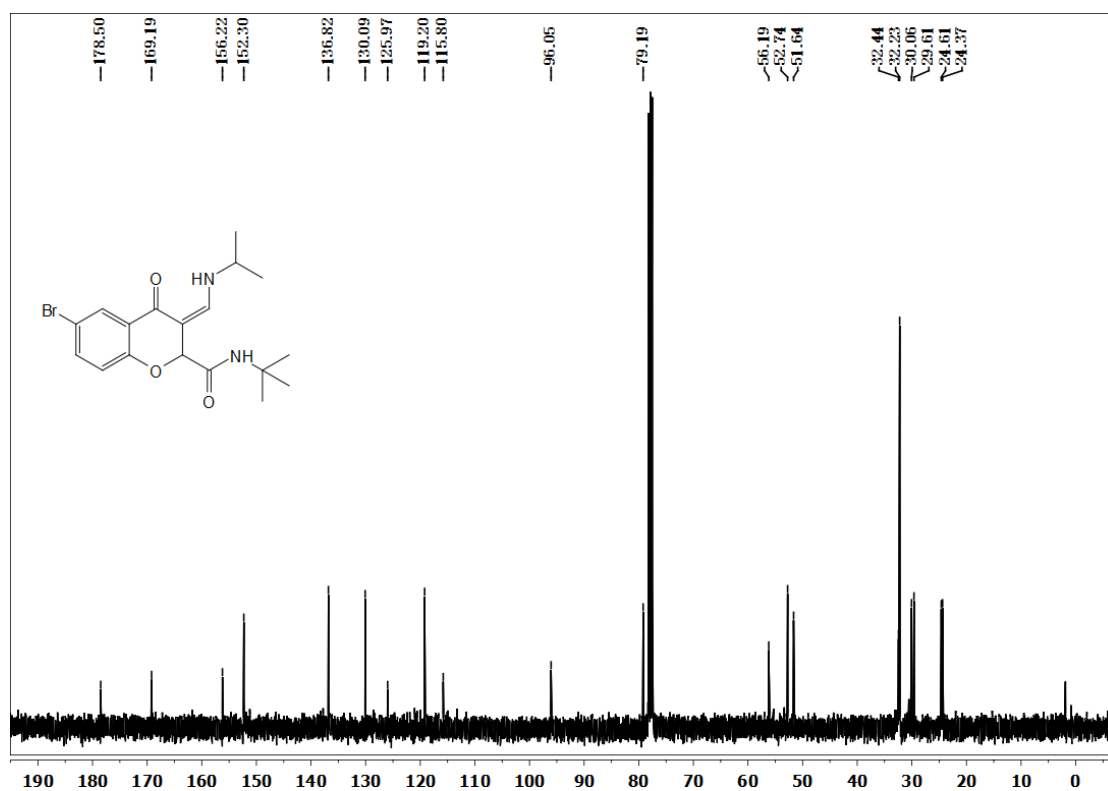



$^1\text{H}$  NMR and  $^{13}\text{C}$  NMR spectrum of **5n**

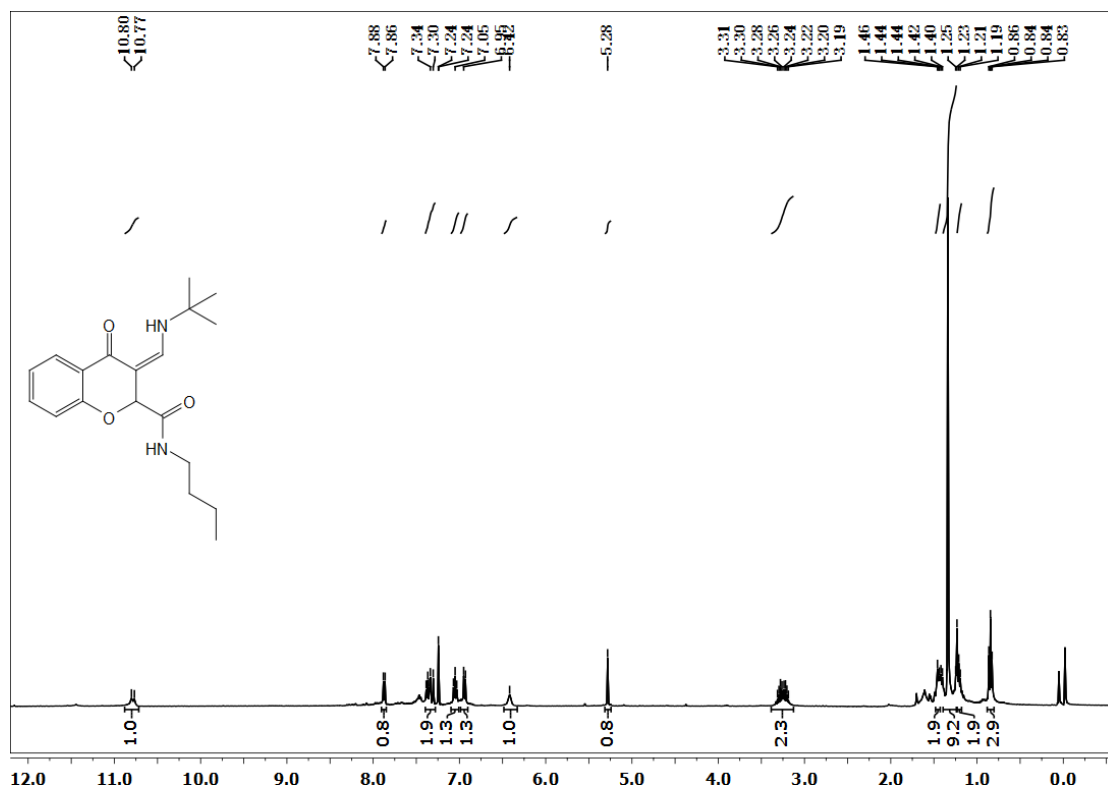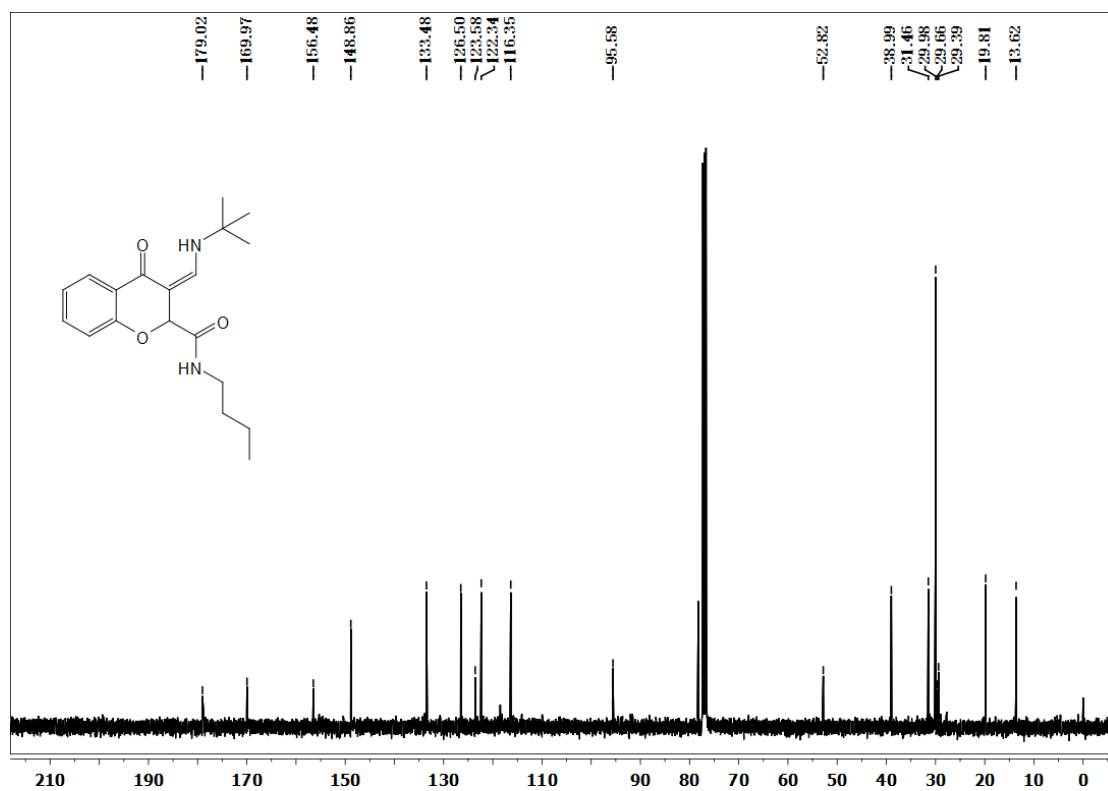

$^1\text{H}$  NMR and  $^{13}\text{C}$  NMR spectrum of **50**

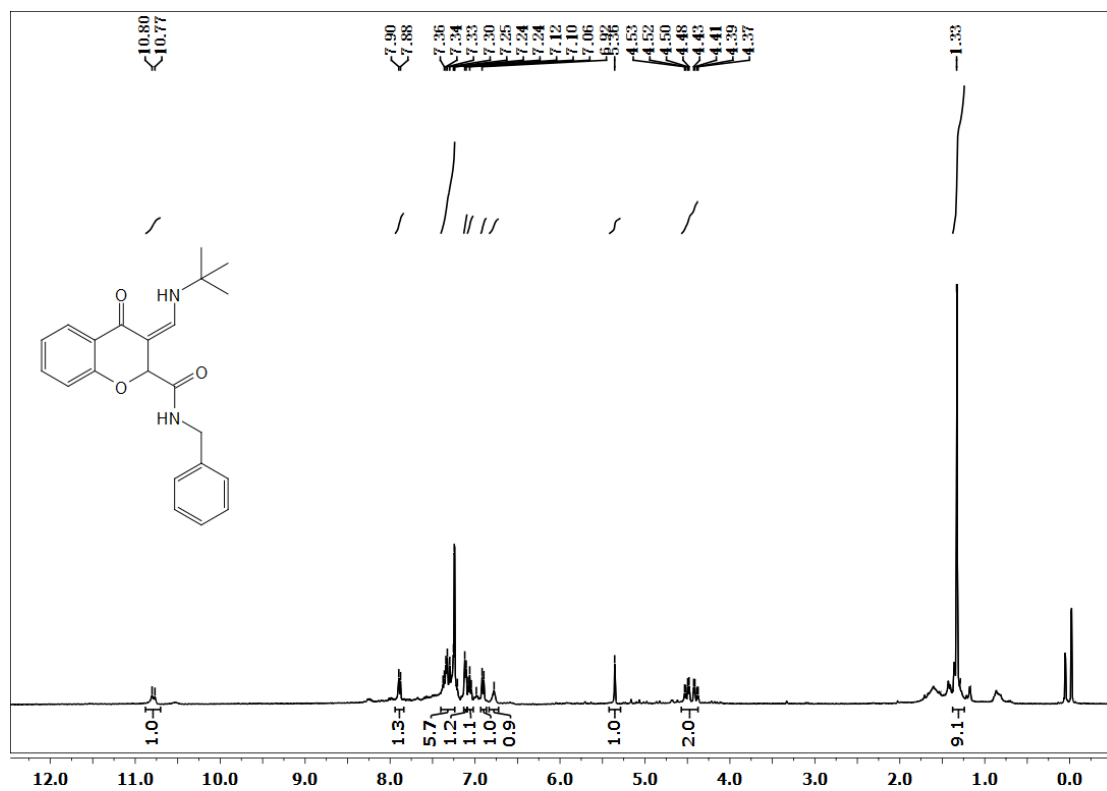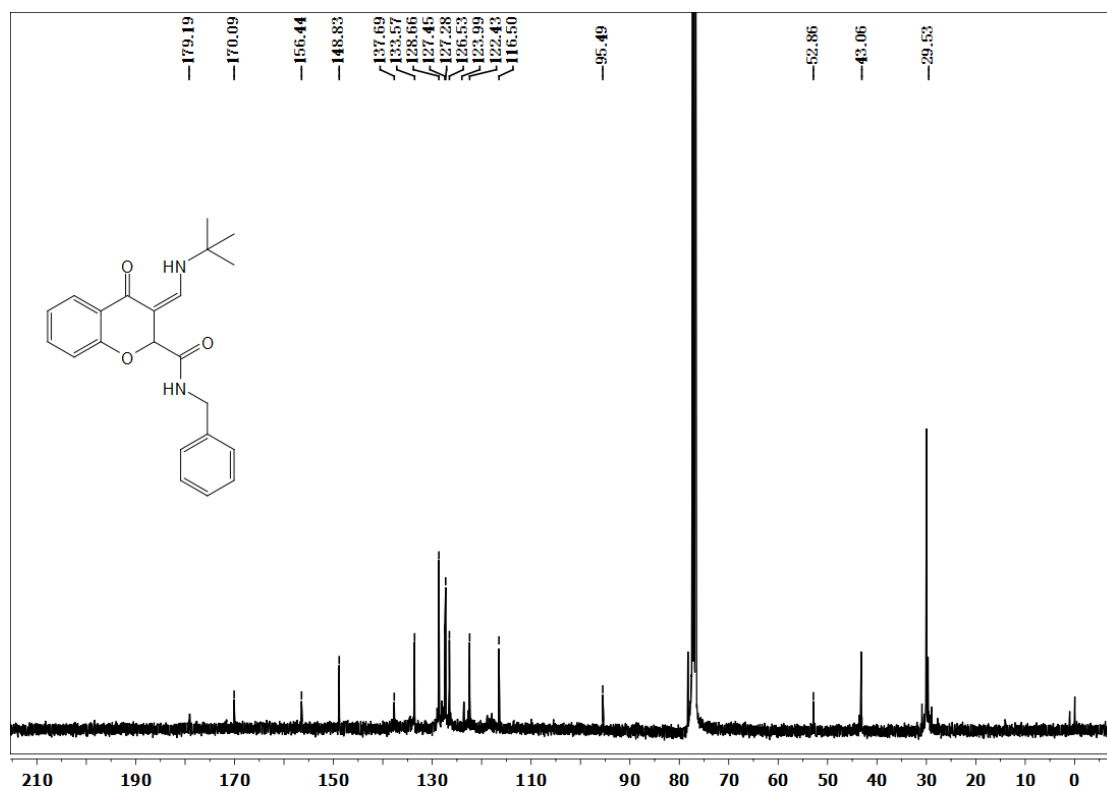

$^1\text{H}$  NMR and  $^{13}\text{C}$  NMR spectrum of **5p**

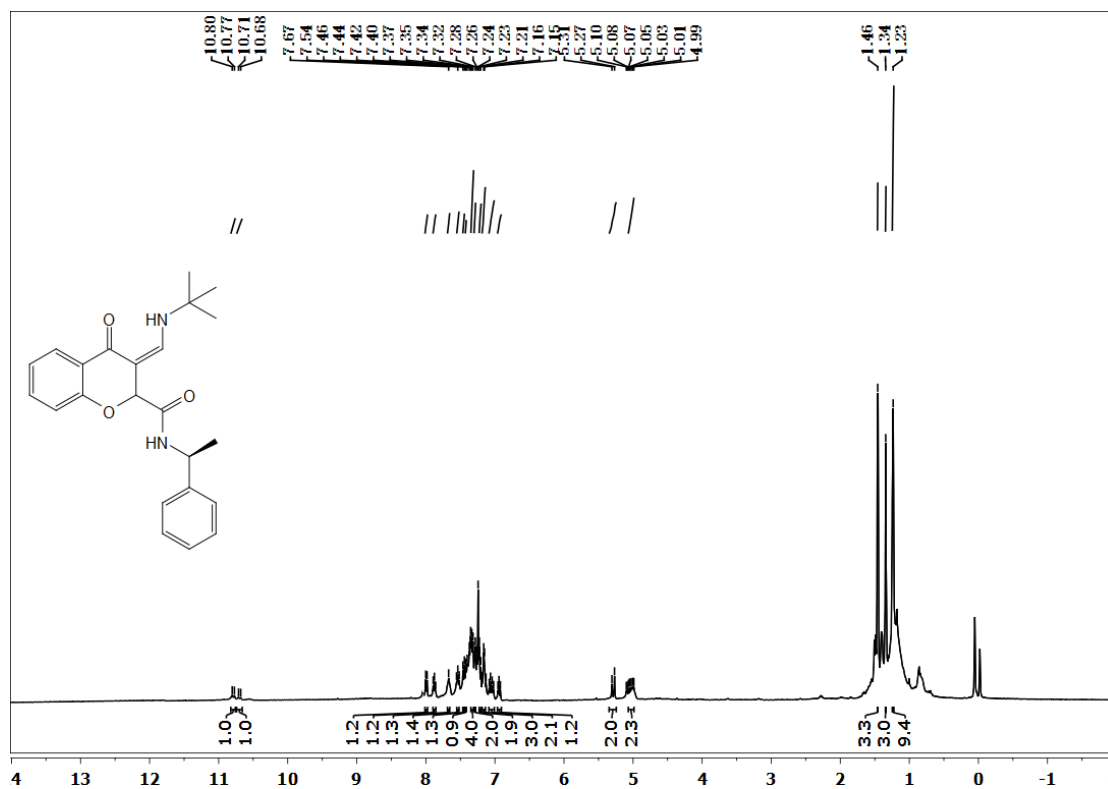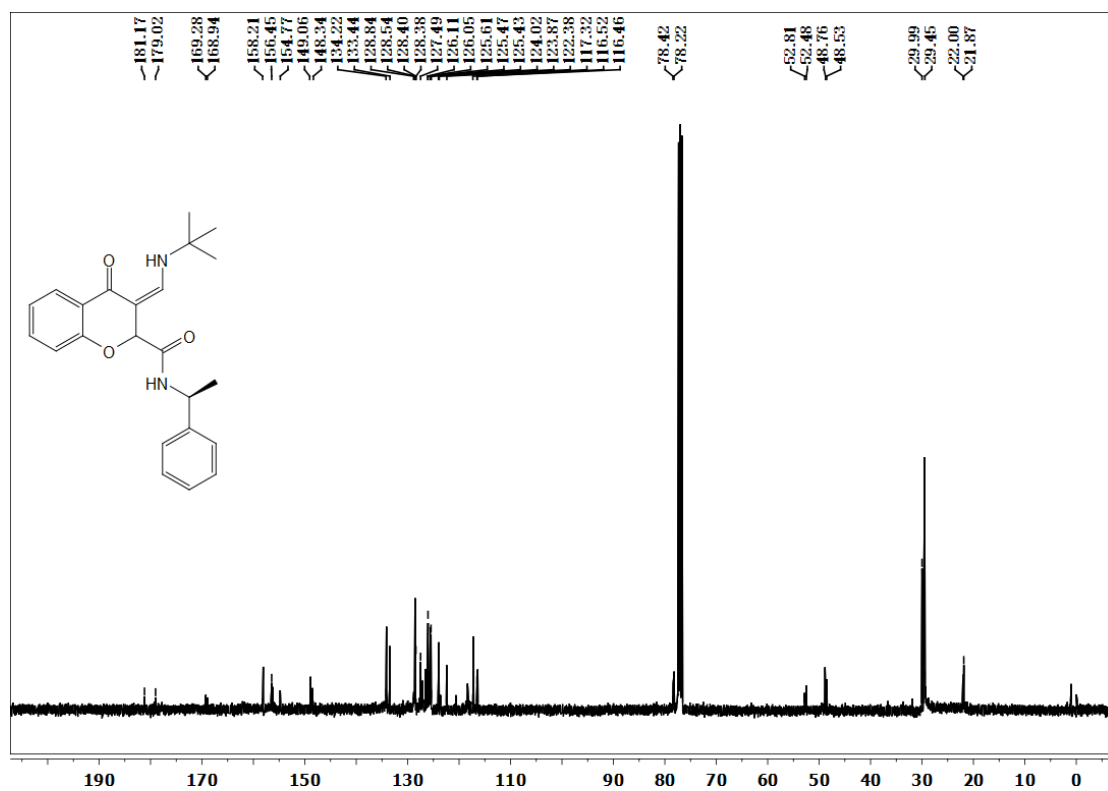

$^1\text{H}$  NMR and  $^{13}\text{C}$  NMR spectrum of **5q**

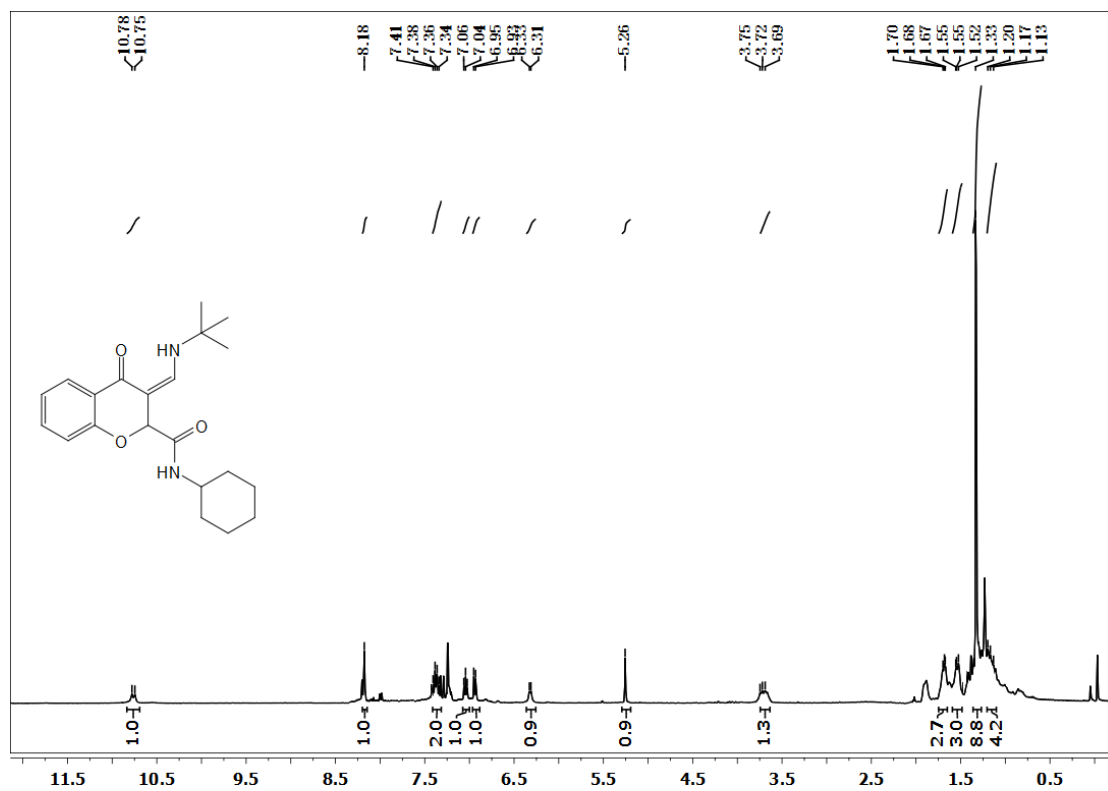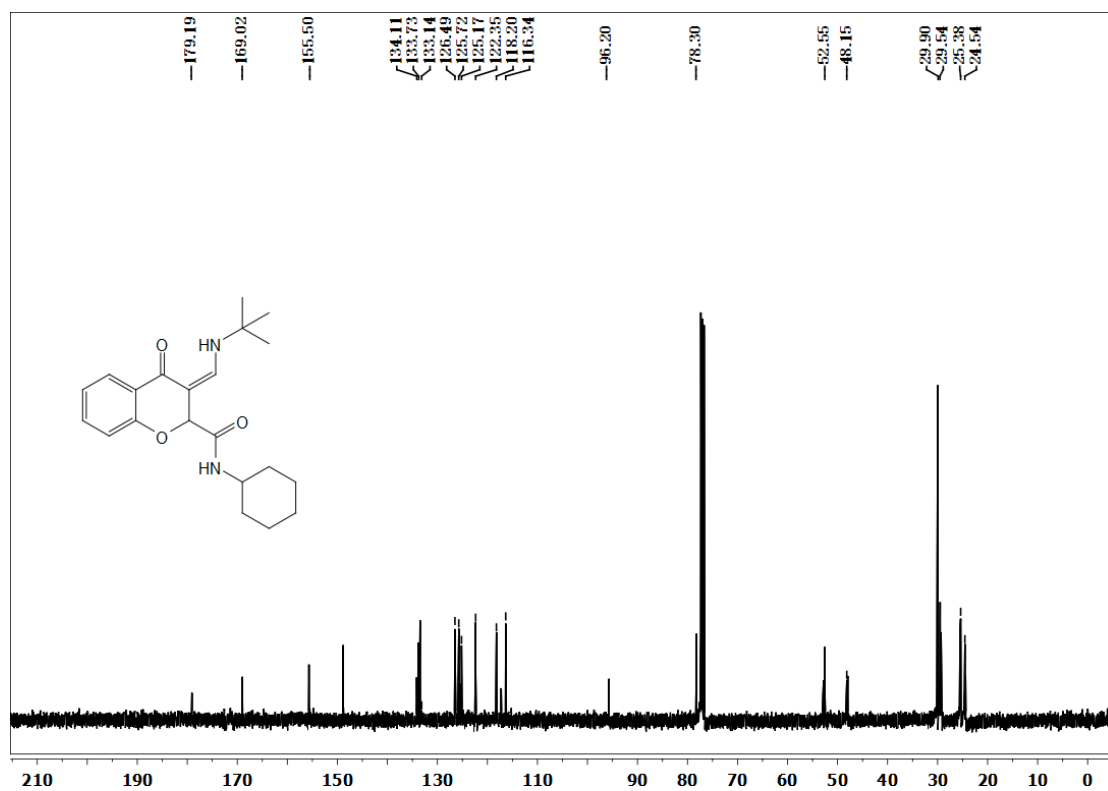

$^1\text{H}$  NMR and  $^{13}\text{C}$  NMR spectrum of **5r**

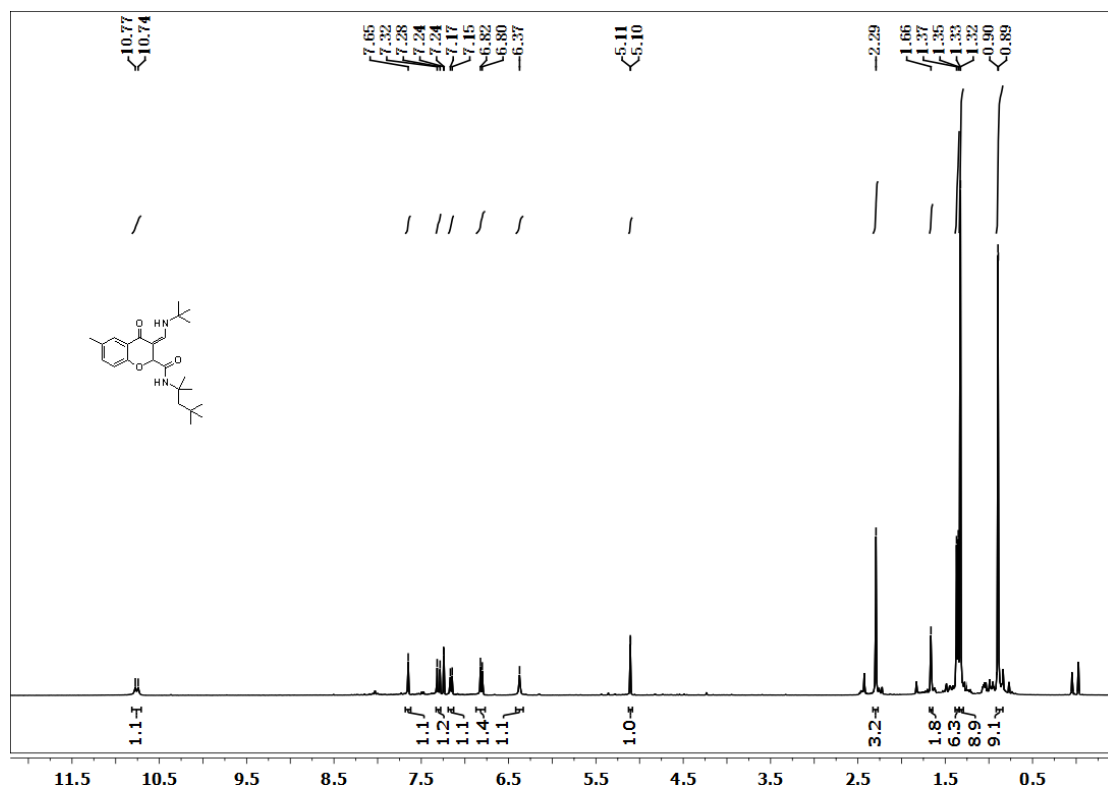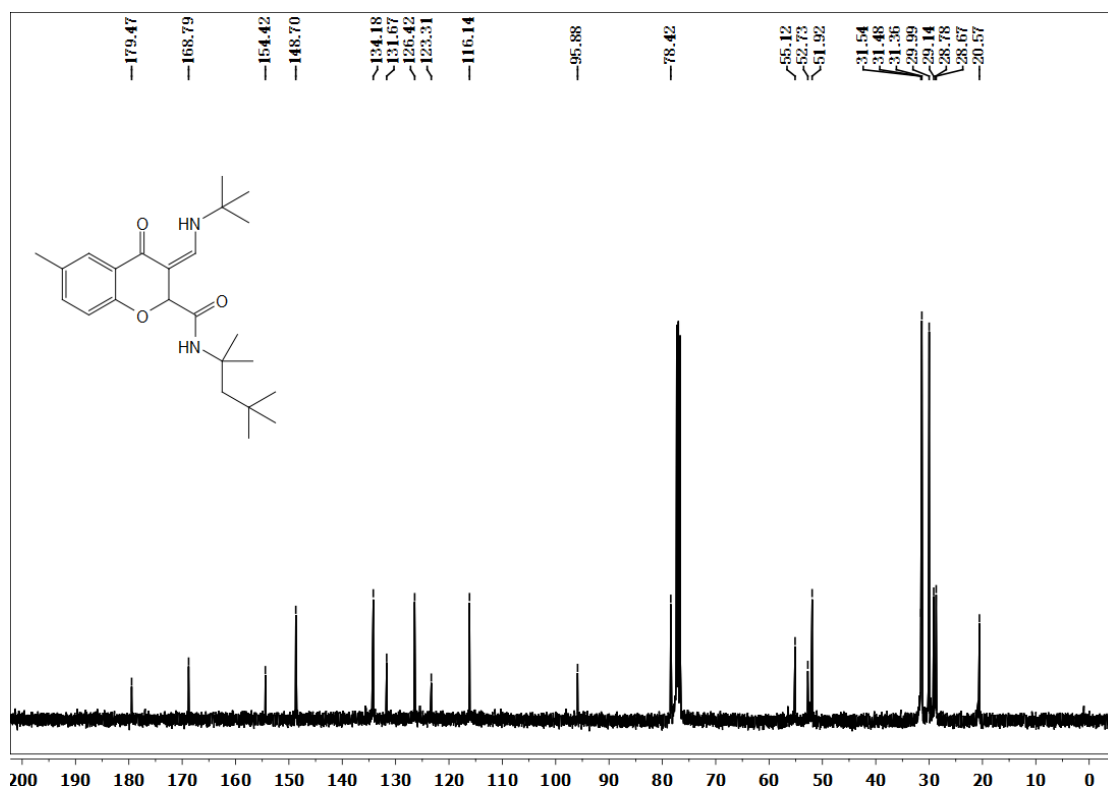

$^1\text{H}$  NMR and  $^{13}\text{C}$  NMR spectrum of **5s**

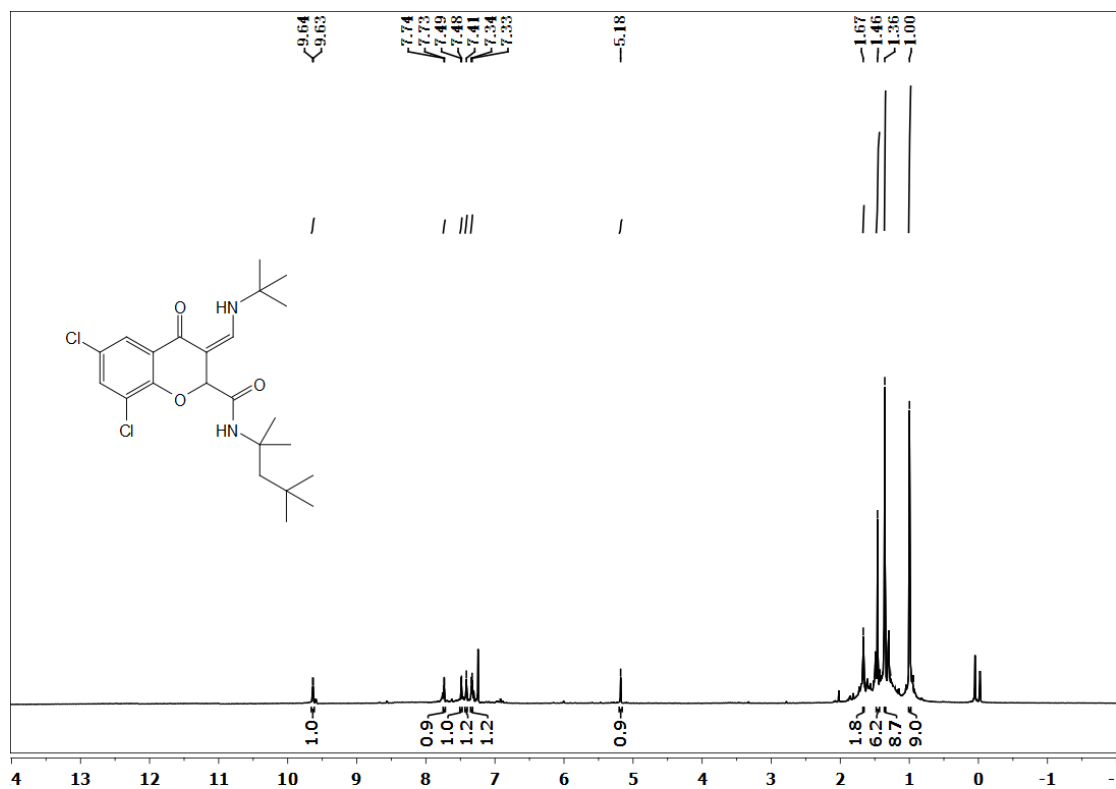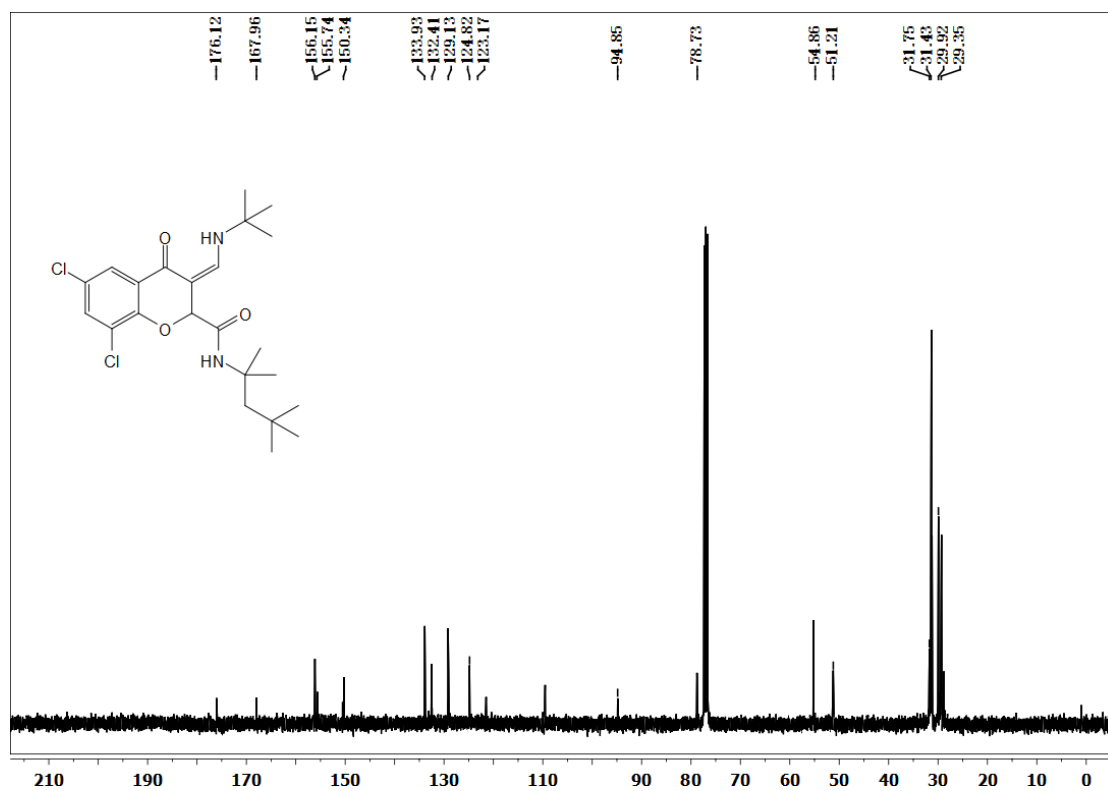

$^1\text{H}$  NMR and  $^{13}\text{C}$  NMR spectrum of **5t**

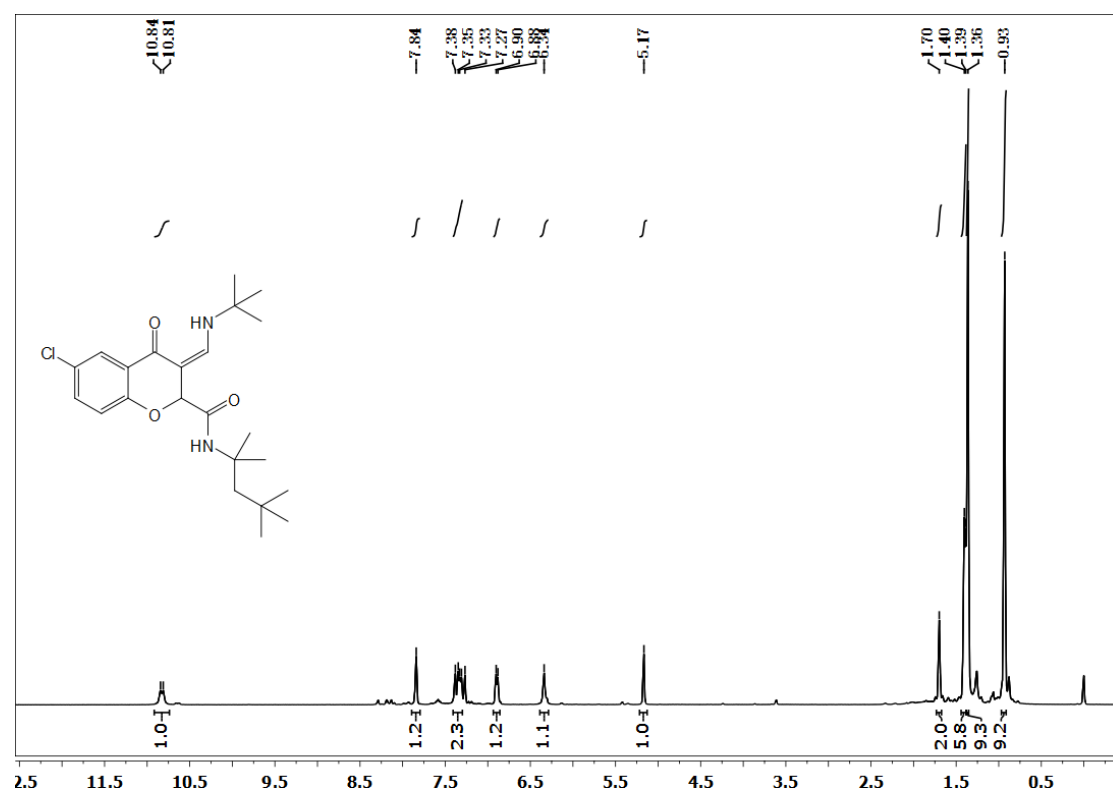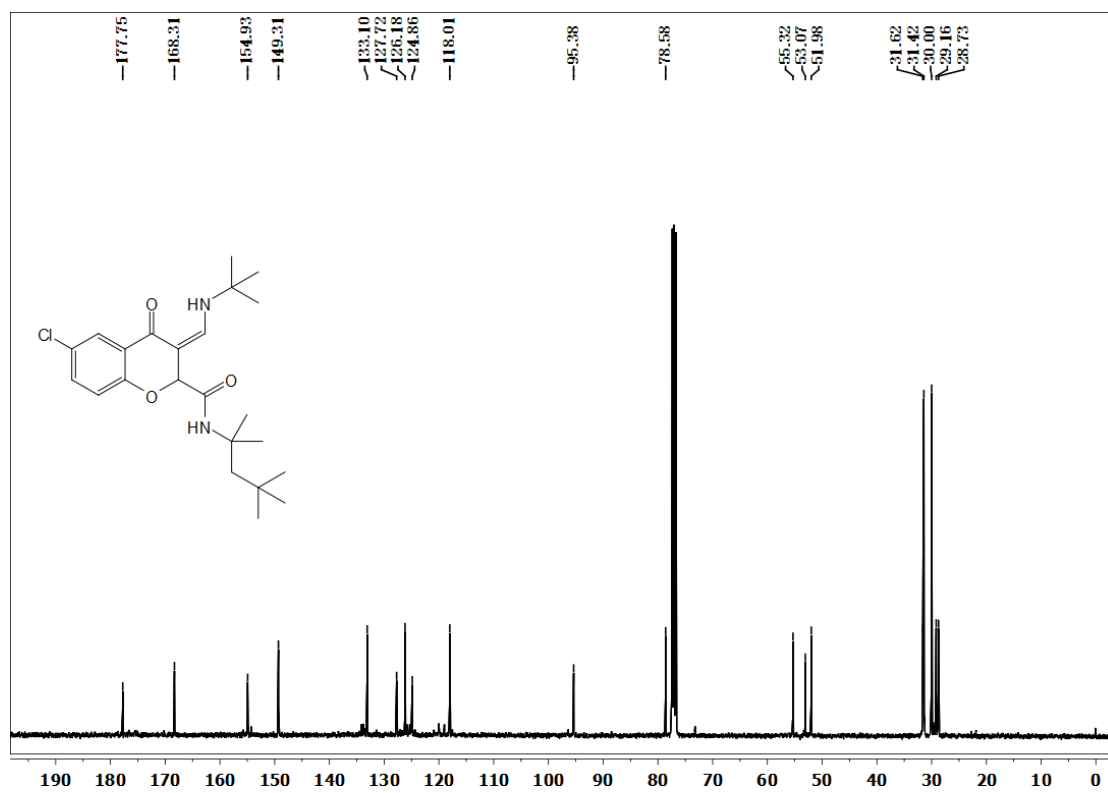

$^1\text{H}$  NMR and  $^{13}\text{C}$  NMR spectrum of **5u**

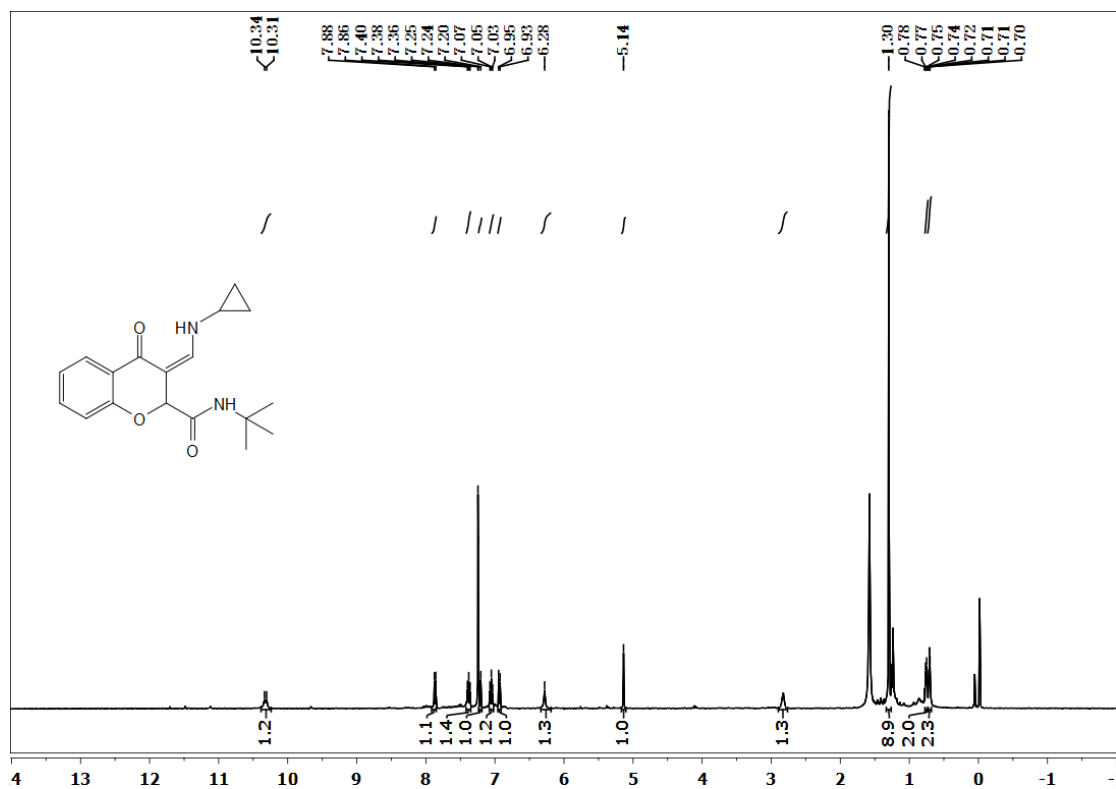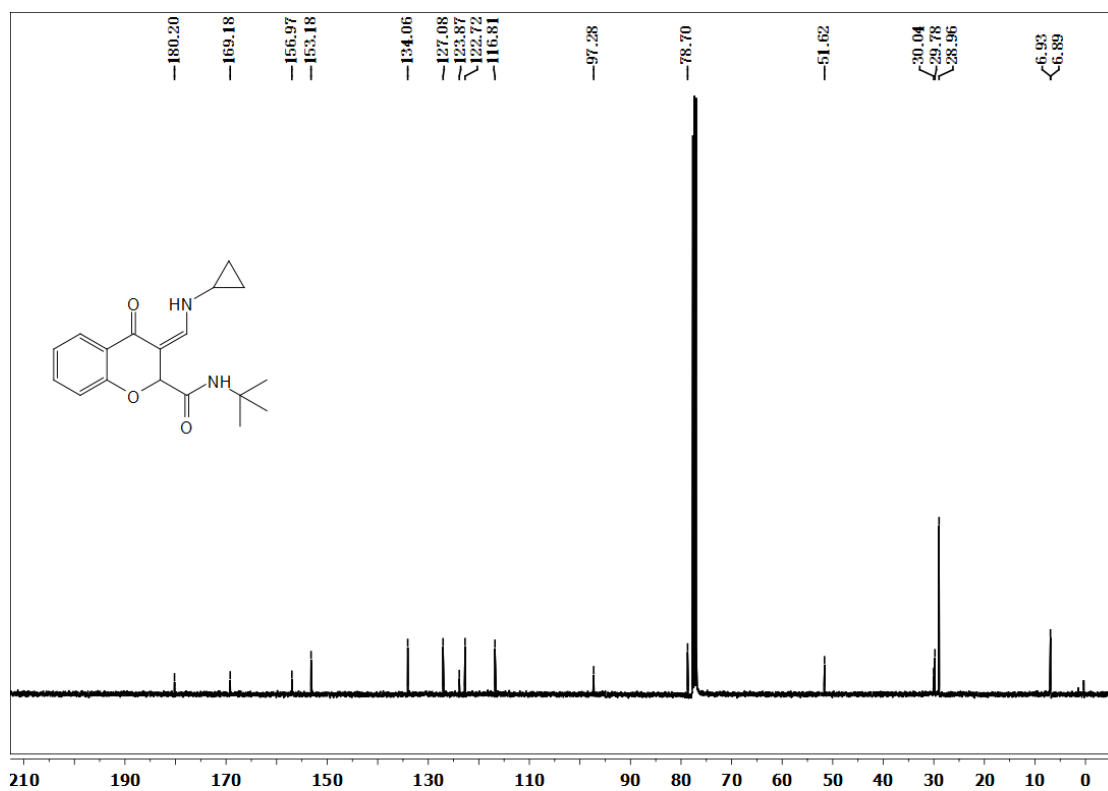



$^1\text{H}$  NMR and  $^{13}\text{C}$  NMR spectrum of **5v**

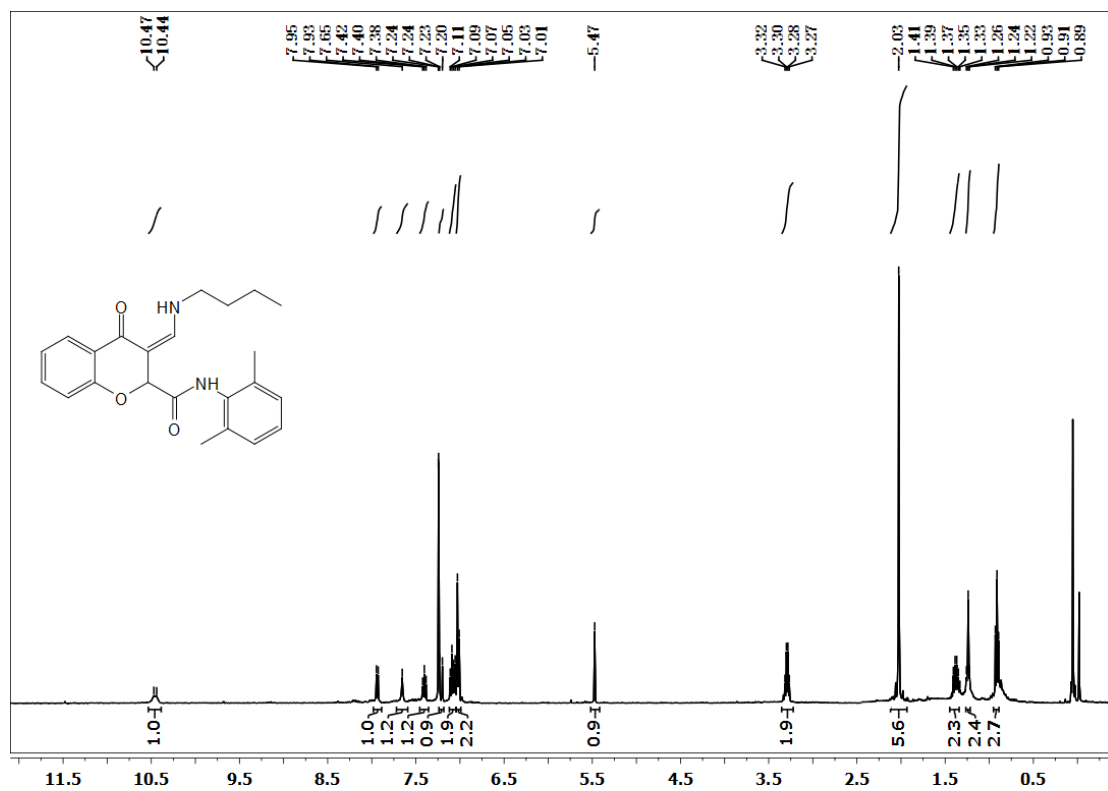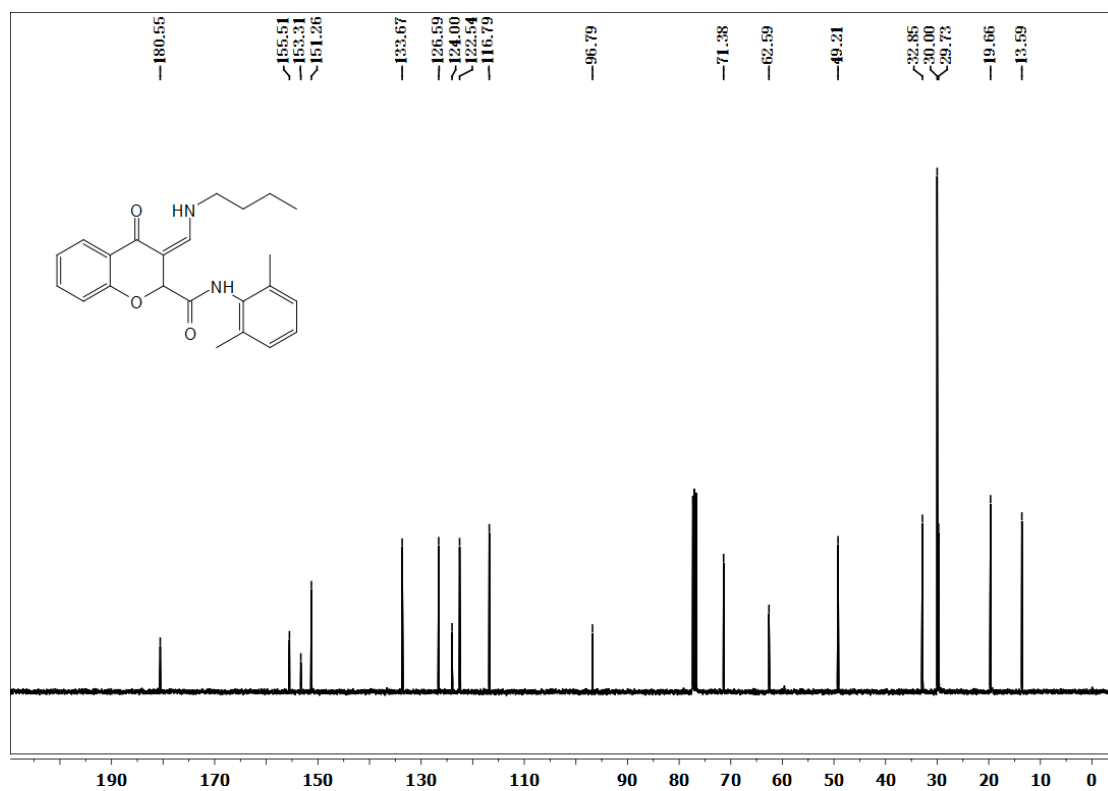

$^1\text{H}$  NMR and  $^{13}\text{C}$  NMR spectrum of **5w**

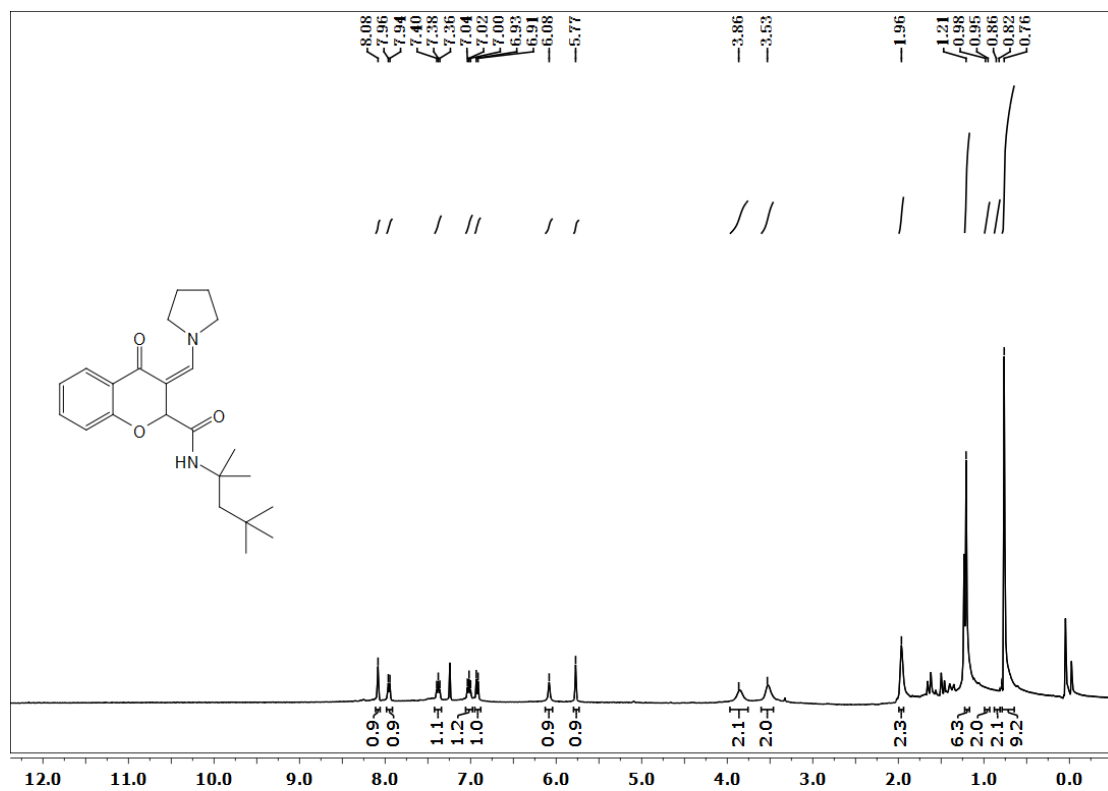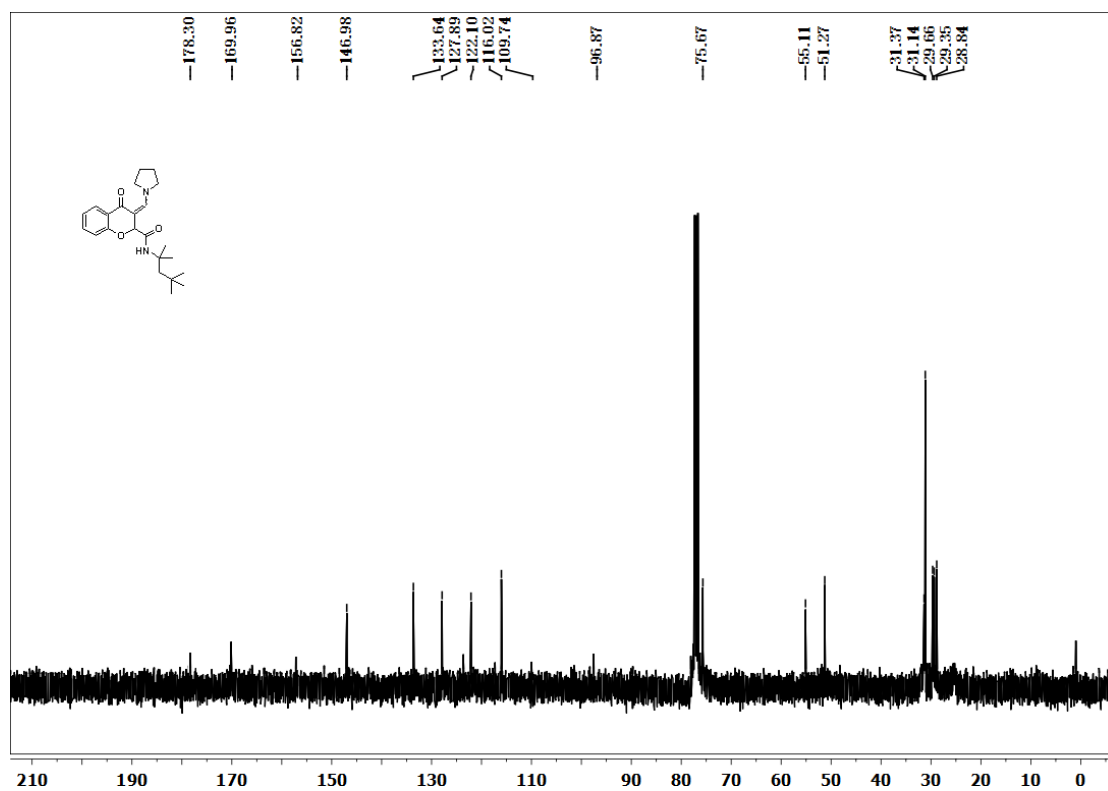

$^1\text{H}$  NMR and  $^{13}\text{C}$  NMR spectrum of **5x**

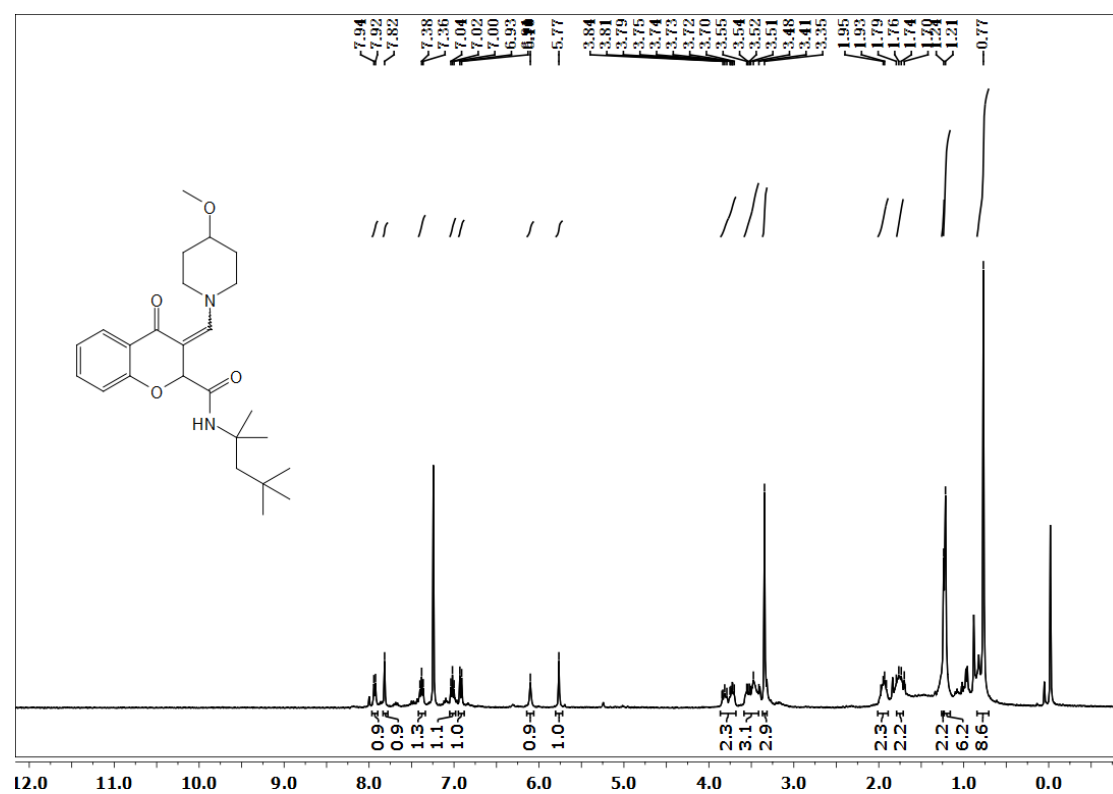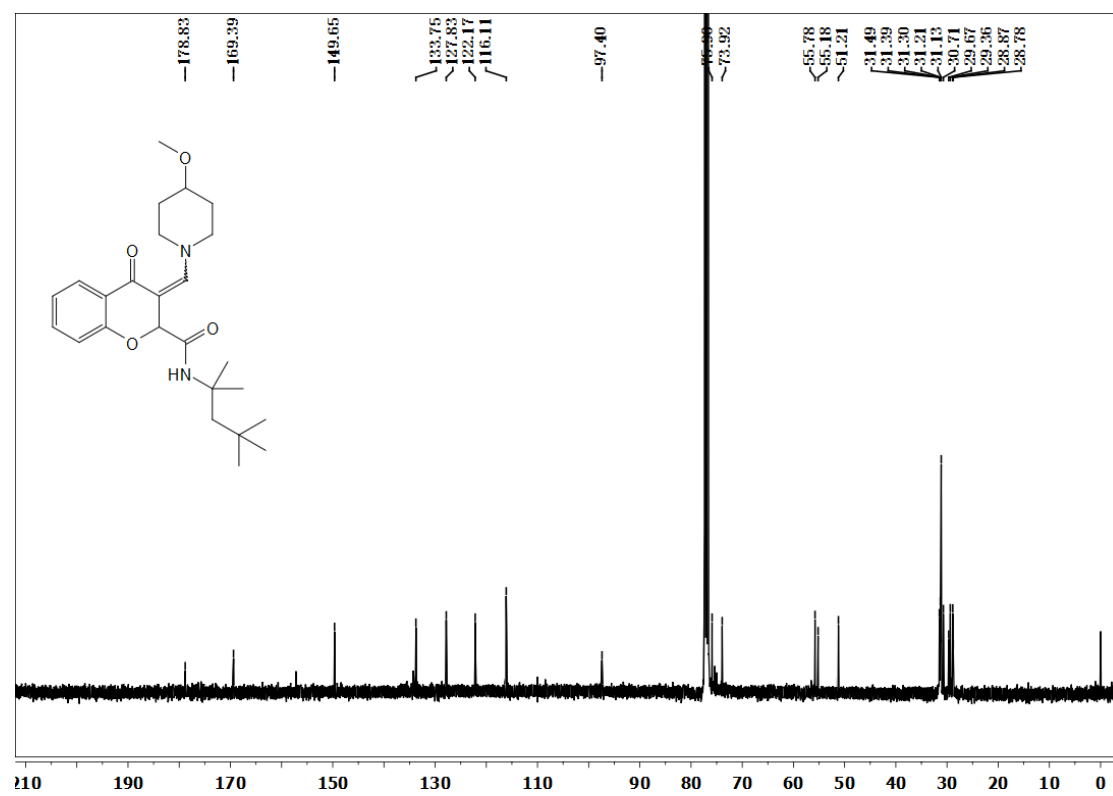

$^1\text{H}$  NMR and  $^{13}\text{C}$  NMR spectrum of **5y**

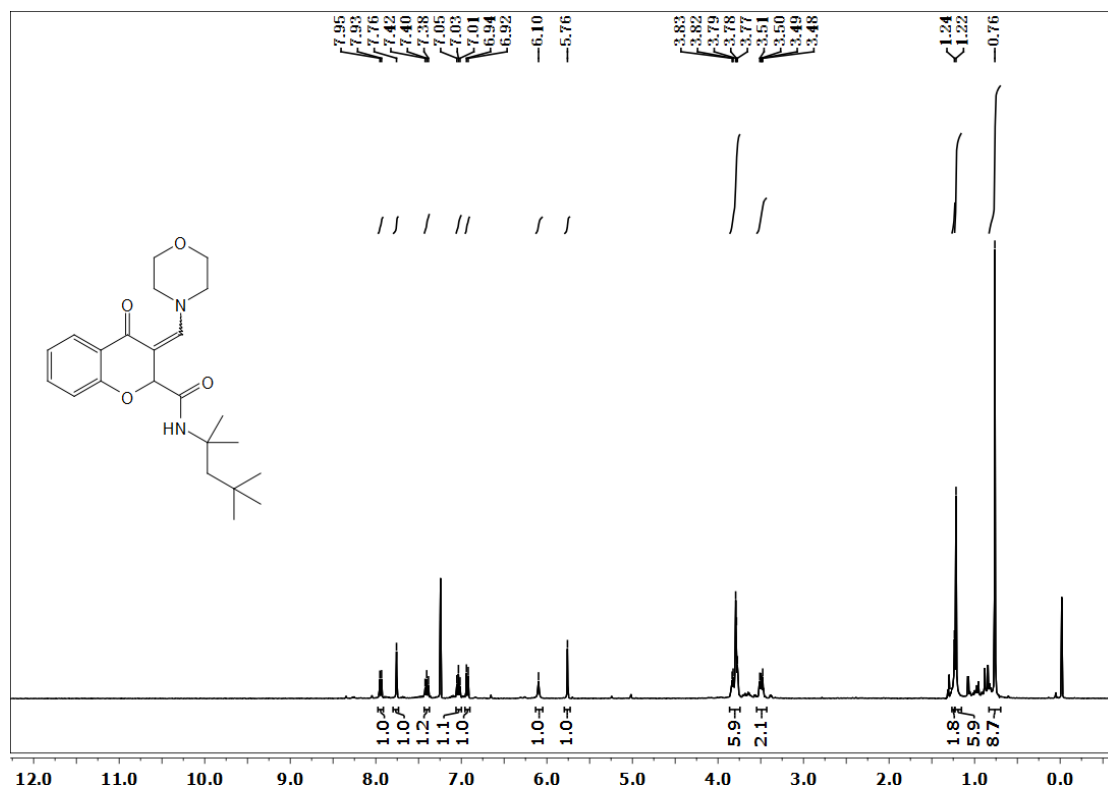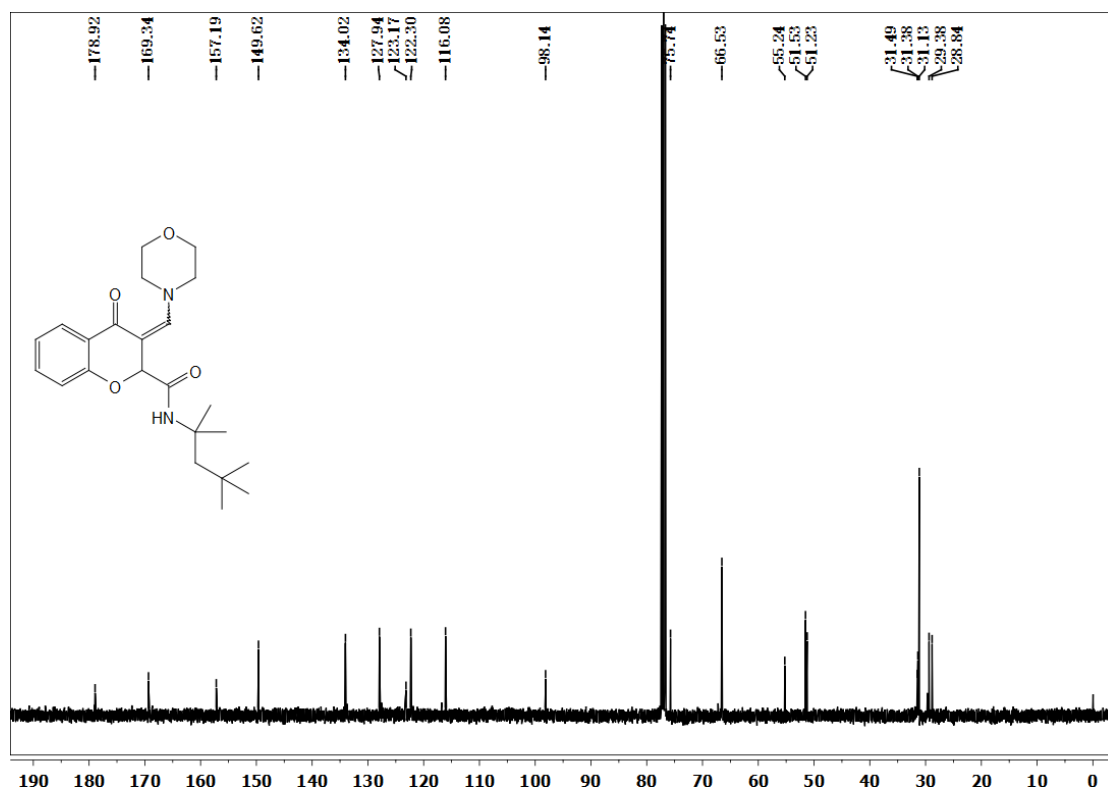

$^1\text{H}$  NMR and  $^{13}\text{C}$  NMR spectrum of **11**

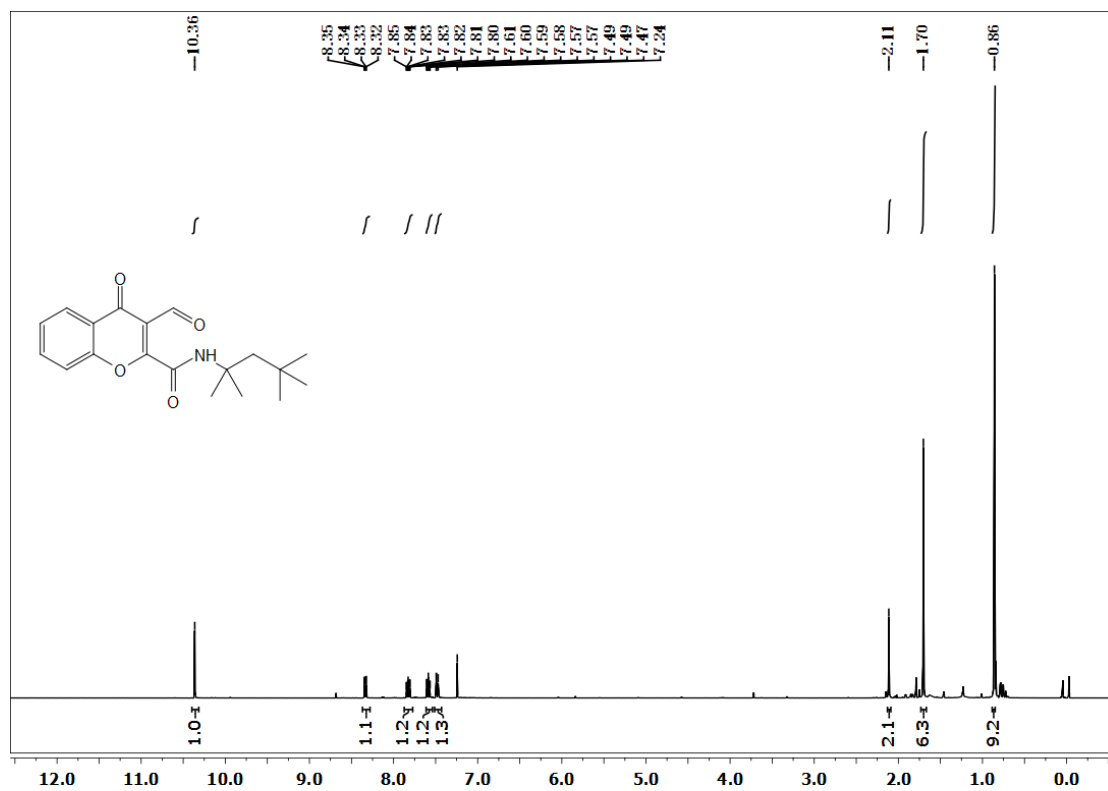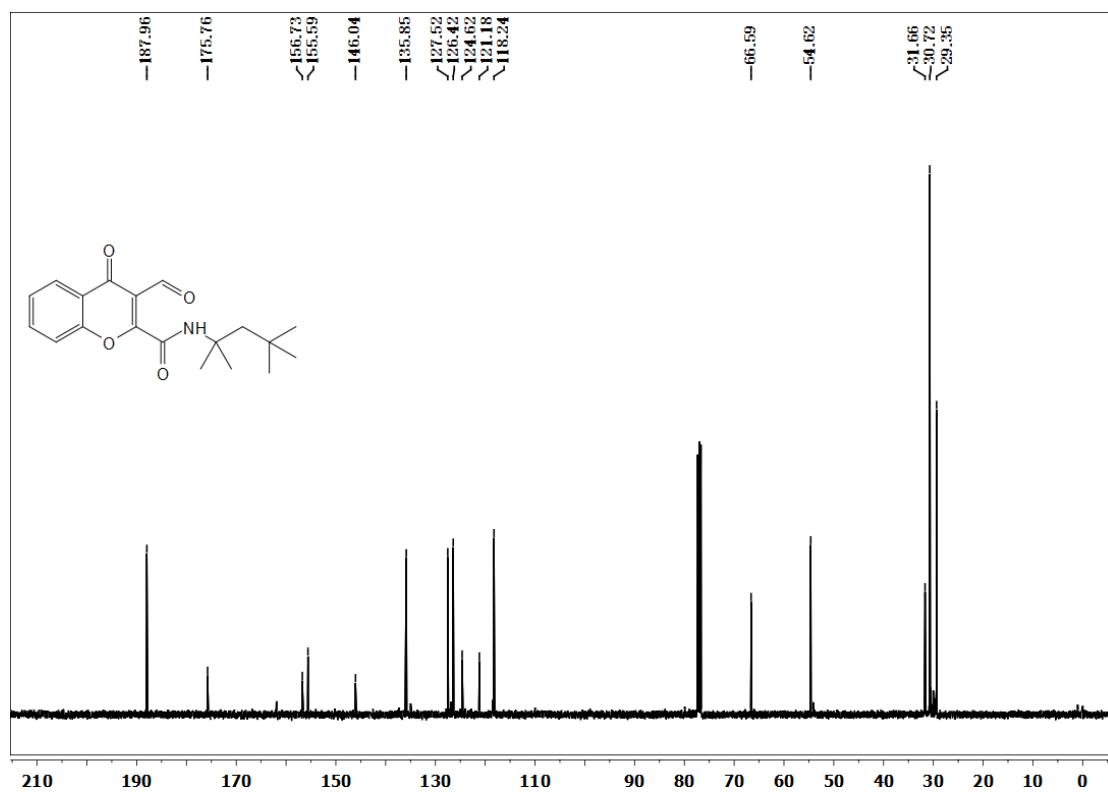

$^1\text{H}$  NMR and  $^{13}\text{C}$  NMR spectrum of **13**

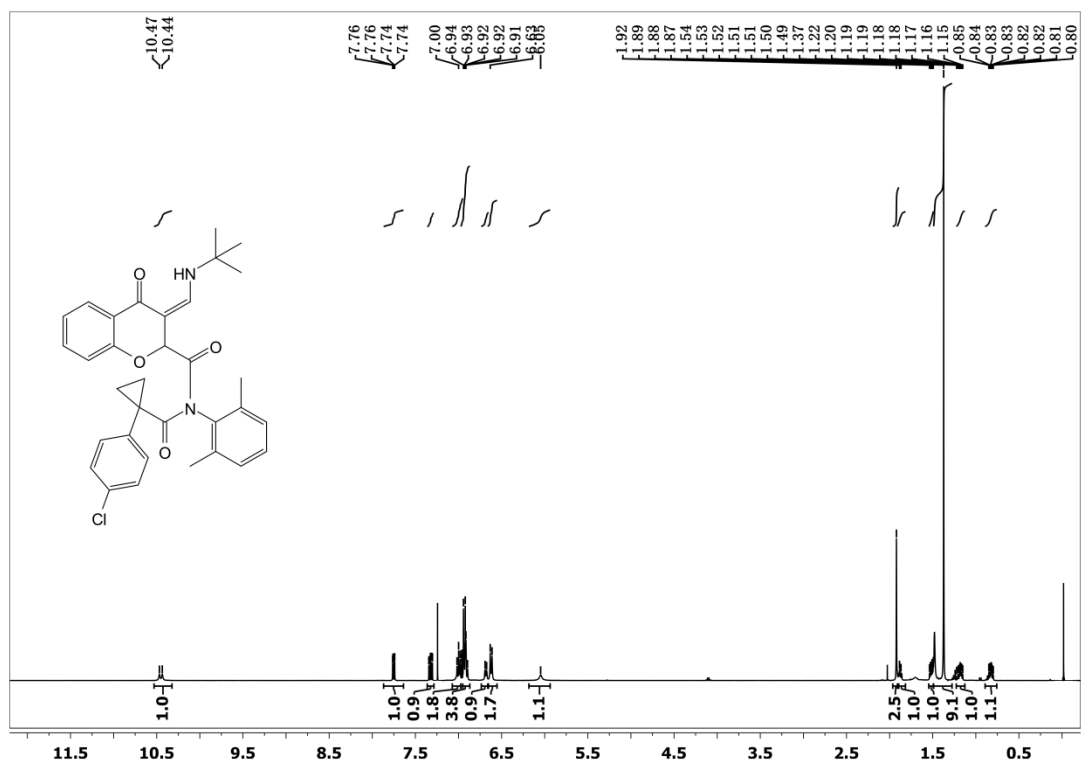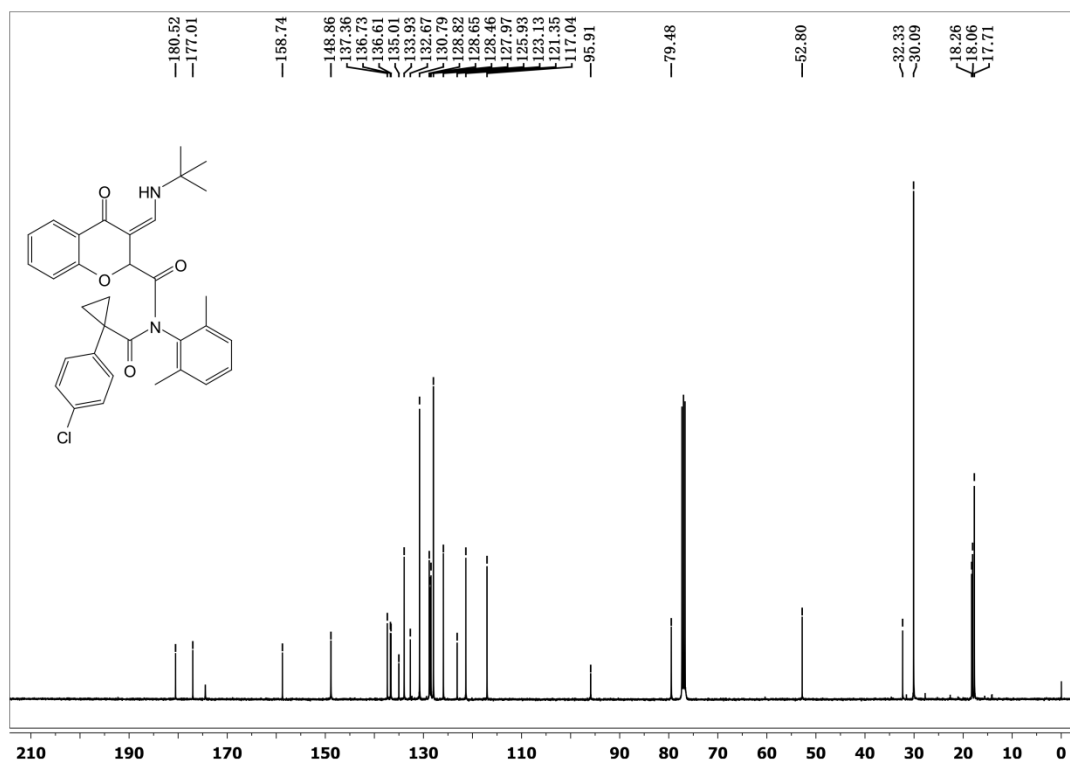

# checkCIF/PLATON report

Structure factors have been supplied for datablock(s) A

THIS REPORT IS FOR GUIDANCE ONLY. IF USED AS PART OF A REVIEW PROCEDURE FOR PUBLICATION, IT SHOULD NOT REPLACE THE EXPERTISE OF AN EXPERIENCED CRYSTALLOGRAPHIC REFEREE.

No syntax errors found.      CIF dictionary      Interpreting this report

## Datablock: A

---

|                 |                  |                    |              |
|-----------------|------------------|--------------------|--------------|
| Bond precision: | C-C = 0.0060 A   | Wavelength=0.71073 |              |
| Cell:           | a=10.3143(11)    | b=13.9869(12)      | c=20.0442(9) |
|                 | alpha=90         | beta=99.155(18)    | gamma=90     |
| Temperature:    | 296 K            |                    |              |
|                 | Calculated       | Reported           |              |
| Volume          | 2854.8(4)        | 2854.8(4)          |              |
| Space group     | P 21/c           | P 1 21/c 1         |              |
| Hall group      | -P 2ybc          | -P 2ybc            |              |
| Moiety formula  | C33 H33 Cl N2 O4 | C33 H33 Cl N2 O4   |              |
| Sum formula     | C33 H33 Cl N2 O4 | C33 H33 Cl N2 O4   |              |
| Mr              | 557.06           | 557.09             |              |
| Dx,g cm-3       | 1.296            | 1.296              |              |
| Z               | 4                | 4                  |              |
| Mu (mm-1)       | 0.175            | 0.175              |              |
| F000            | 1176.0           | 1177.1             |              |
| F000'           | 1177.09          |                    |              |
| h,k,lmax        | 12,16,23         | 12,16,23           |              |
| Nref            | 5029             | 5020               |              |
| Tmin,Tmax       | 0.952,0.966      | 0.952,0.966        |              |
| Tmin'           | 0.952            |                    |              |

Correction method= # Reported T Limits: Tmin=0.952 Tmax=0.966  
AbsCorr = NONE

Data completeness= 0.998      Theta(max)= 25.000

R(reflections)= 0.0607( 2297)      wR2(reflections)= 0.1398( 5020)

S = 1.110      Npar= 361

---

The following ALERTS were generated. Each ALERT has the format

**test-name\_ALERT\_alert-type\_alert-level.**

Click on the hyperlinks for more details of the test.

---

● **Alert level C**

ABSTY03\_ALERT\_1\_C The \_exptl\_absorpt\_correction\_type has been given as none.  
However values have been given for Tmin and Tmax. Remove  
these if an absorption correction has not been applied.  
From the CIF: \_exptl\_absorpt\_correction\_T\_min 0.952  
From the CIF: \_exptl\_absorpt\_correction\_T\_max 0.966

|                   |                                                  |         |        |
|-------------------|--------------------------------------------------|---------|--------|
| PLAT026_ALERT_3_C | Ratio Observed / Unique Reflections (too) Low .. | 46%     | Check  |
| PLAT230_ALERT_2_C | Hirshfeld Test Diff for C21 --C29 .              | 5.3     | s.u.   |
| PLAT241_ALERT_2_C | High 'MainMol' Ueq as Compared to Neighbors of   | C9      | Check  |
| PLAT241_ALERT_2_C | High 'MainMol' Ueq as Compared to Neighbors of   | C26     | Check  |
| PLAT242_ALERT_2_C | Low 'MainMol' Ueq as Compared to Neighbors of    | C1      | Check  |
| PLAT242_ALERT_2_C | Low 'MainMol' Ueq as Compared to Neighbors of    | C30     | Check  |
| PLAT334_ALERT_2_C | Small Aver. Benzene C-C Dist C23 -C28            | 1.37    | Ang.   |
| PLAT340_ALERT_3_C | Low Bond Precision on C-C Bonds .....            | 0.00597 | Ang.   |
| PLAT905_ALERT_3_C | Negative K value in the Analysis of Variance ... | -1.909  | Report |
| PLAT911_ALERT_3_C | Missing FCF Refl Between Thmin & STh/L= 0.595    | 9       | Report |
| PLAT978_ALERT_2_C | Number C-C Bonds with Positive Residual Density. | 0       | Info   |

---

● **Alert level G**

|                   |                                                  |        |        |
|-------------------|--------------------------------------------------|--------|--------|
| PLAT066_ALERT_1_G | Predicted and Reported Tmin&Tmax Range Identical | ?      | Check  |
| PLAT073_ALERT_1_G | H-atoms ref, but _hydrogen_treatment Reported as | constr | Check  |
| PLAT380_ALERT_4_G | Incorrectly? Oriented X(sp2)-Methyl Moiety ..... | C13    | Check  |
| PLAT380_ALERT_4_G | Incorrectly? Oriented X(sp2)-Methyl Moiety ..... | C18    | Check  |
| PLAT793_ALERT_4_G | Model has Chirality at C20 (Centro SPGR)         | S      | Verify |
| PLAT883_ALERT_1_G | No Info/Value for _atom_sites_solution_primary . | Please | Do !   |
| PLAT933_ALERT_2_G | Number of OMIT Records in Embedded .res File ... | 5      | Note   |
| PLAT960_ALERT_3_G | Number of Intensities with I < - 2*sig(I) ...    | 17     | Check  |
| PLAT983_ALERT_1_G | The Cl-f"= 0.1603 Deviates from IT-Value =       | 0.1585 | Check  |

---

- 0 **ALERT level A** = Most likely a serious problem - resolve or explain  
0 **ALERT level B** = A potentially serious problem, consider carefully  
12 **ALERT level C** = Check. Ensure it is not caused by an omission or oversight  
9 **ALERT level G** = General information/check it is not something unexpected
- 5 ALERT type 1 CIF construction/syntax error, inconsistent or missing data  
8 ALERT type 2 Indicator that the structure model may be wrong or deficient  
5 ALERT type 3 Indicator that the structure quality may be low  
3 ALERT type 4 Improvement, methodology, query or suggestion  
0 ALERT type 5 Informative message, check
- 
-



It is advisable to attempt to resolve as many as possible of the alerts in all categories. Often the minor alerts point to easily fixed oversights, errors and omissions in your CIF or refinement strategy, so attention to these fine details can be worthwhile. In order to resolve some of the more serious problems it may be necessary to carry out additional measurements or structure refinements. However, the purpose of your study may justify the reported deviations and the more serious of these should normally be commented upon in the discussion or experimental section of a paper or in the "special\_details" fields of the CIF. checkCIF was carefully designed to identify outliers and unusual parameters, but every test has its limitations and alerts that are not important in a particular case may appear. Conversely, the absence of alerts does not guarantee there are no aspects of the results needing attention. It is up to the individual to critically assess their own results and, if necessary, seek expert advice.

### **Publication of your CIF in IUCr journals**

A basic structural check has been run on your CIF. These basic checks will be run on all CIFs submitted for publication in IUCr journals (*Acta Crystallographica*, *Journal of Applied Crystallography*, *Journal of Synchrotron Radiation*); however, if you intend to submit to *Acta Crystallographica Section C* or *E* or *IUCrData*, you should make sure that full publication checks are run on the final version of your CIF prior to submission.

### **Publication of your CIF in other journals**

Please refer to the *Notes for Authors* of the relevant journal for any special instructions relating to CIF submission.

---

**PLATON version of 17/03/2019; check.def file version of 04/03/2019**

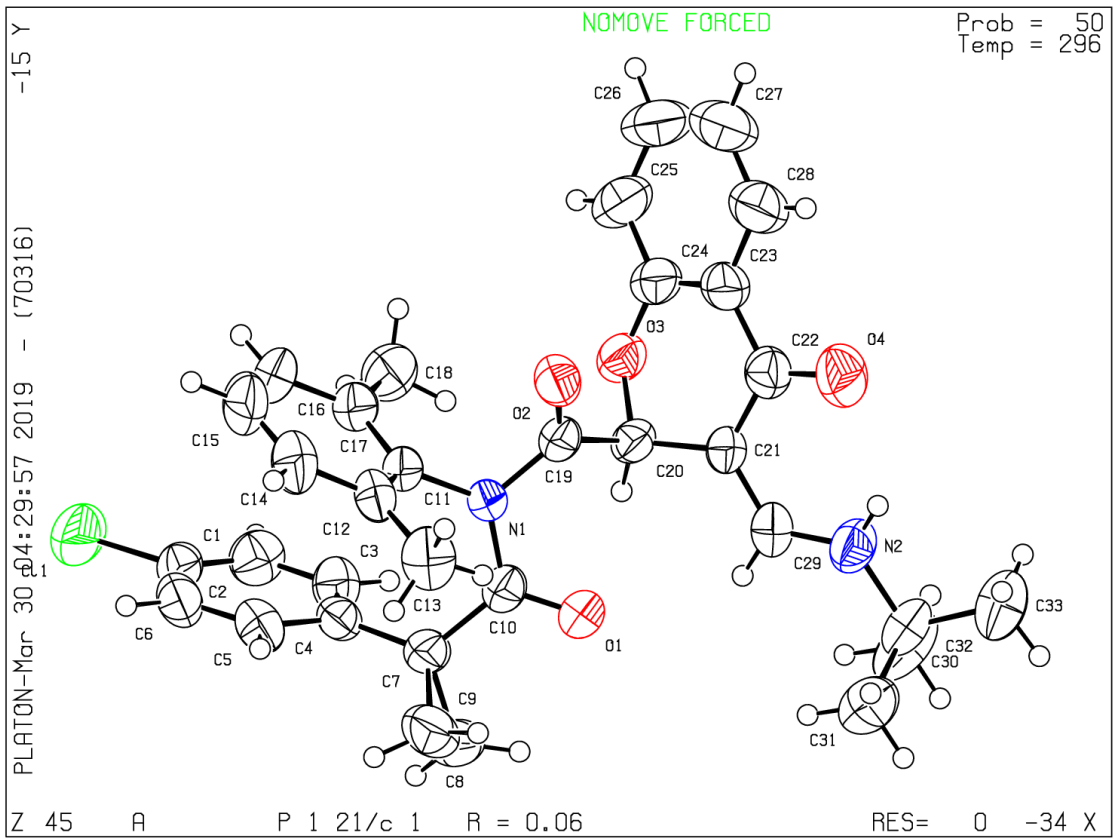

Supplement: d0gc00652a1.pdf [file d0gc00652a1.pdf]
